# Supplementary material for: Cryo-EM reveals a conserved baseplate architecture and distinct accessory protein assemblies in mycobacteriophages Claus, Corndog and Mysterious
Source: Research Square preprint supplement (doi:10.21203/rs.3.rs-9616548/v1), 2026-06-05
Supplement: Supplementary file 1 [file 45458fe534141d60a3248df5.docx]

**Cryo-EM reveals unique baseplate architectures underlying host adaptation in mycobacteriophages *Claus*, *Corndog* and *Mysterious***

Sunil Kumar Tewary1,Chun-Hsiung Wang1, Ming-Ching Lin1,2, Melvin C. Shen1, Li-An Tsai1, 2, Yel1, Todd L. Lowary1,2 and Meng-Chiao Ho1,2

1Institute of Biological Chemistry, Academia Sinica; 2Institute of Biochemical Sciences, National Taiwan University

**Supplementary Tables**

**Supplementary Table 3 - Claus inter and Intra subunit interactions**

**Supplementary Tables 3a**

**gp13 (TTP) chian A /gp17 (DTP)/gp26 (BppU) inter complex interactions**

| **Interface** | **Chain1** | **gp13** | **Chain2** | **gp17** | **Disatnce (Å)** | **Bond type** |
| --- | --- | --- | --- | --- | --- | --- |
| Chain A↔Chain J | A | ARG82 | J | ASP133 | 2.87 | Salt bridge (Electrostatic, Hydrogen bond) |
| Chain A↔Chain J | A | TYR75 | J | SER20 | 2.78 | Hydrogen bond |
| Chain A↔Chain J | A | ARG82 | J | GLY73 | 3.47 | Hydrogen bond |
| Chain A↔Chain J | A | TYR75 | J | LEU31 | 2.89 | Hydrogen bond (Hydrophobic) |
| Chain A↔Chain J | A | GLY76 | J | SER2 | 3.30 | Hydrogen bond |
| Chain A↔Chain J | A | TYR75 | J | ILE7 |  | Hydrophobic |
| Chain A↔Chain J | A | TYR75 | J | VAL35 |  | Hydrophobic |
| Chain A↔Chain K | A | LYS159 | K | GLU75 | 2.82 | Salt bridge (Electrostatic, Hydrogen bond) |
| Chain A↔Chain K | A | VAL130 | K | LEU130 |  | Hydrophobic |

| **Interface** | **Chain1** | **gp13** | **Chain2** | **gp26** | **Disatnce (Å)** | **Bond type** |
| --- | --- | --- | --- | --- | --- | --- |
| Chain A↔Chain S | A | GLU126 | S | ARG23 | 2.97 | Salt bridge (Electrostatic, Hydrogen bond) |
| Chain A↔Chain S | A | ASP114 | S | MET1 | 2.93 | Hydrogen bond |
| Chain A↔Chain S | A | GLU126 | S | LYS25 | 5.98 | Electrostatic |
| Chain A↔Chain S | A | ILE115 | S | PRO26 |  | Hydrophobic |
| Chain A↔Chain S | A | VAL124 | S | PRO26 |  | Hydrophobic |
| Chain A↔Chain T | A | SER28 | T | ASP28 | 2.81 | Hydrogen bond |
| Chain A↔Chain T | A | SER28 | T | LYS25 | 3.20 | Hydrogen bond |
| Chain A↔Chain T | A | ASP114 | T | ARG23 | 2.82 | Salt bridge (Electrostatic, Hydrogen bond) |
| Chain A↔Chain T | A | THR30 | T | GLY27 | 3.42 | Hydrogen bond |
| Chain A↔Chain U | A | VAL190 | U | ARG23 | 2.93 | Hydrogen bond |
| Chain A↔Chain U | A | TYR192 | U | ARG23 | 5.58 | Cation–π |

**Supplementary Tables 3a**

**gp13 (TTP) chain A interactions (Intra)**

| **Interface** | **Chain1** | **gp13** | **Chain2** | **gp13** | **Disatnce (Å)** | **Bond type** |
| --- | --- | --- | --- | --- | --- | --- |
| Chain A↔Chain B | A | LYS7 | B | ASN19 | 3.00 | Hydrogen bond |
| Chain A↔Chain B | A | GLU36 | B | SER118 | 2.85 | Hydrogen bond |
| Chain A↔Chain B | A | ASP71 | B | LYS183 | 3.38 | Salt bridge (Electrostatic, Hydrogen bond) |
| Chain A↔Chain B | A | GLU77 | B | ARG186 | 3.35 | Salt bridge (Electrostatic, Hydrogen bond) |
| Chain A↔Chain B | A | GLU79 | B | SER193 | 3.15 | Hydrogen bond |
| Chain A↔Chain B | A | GLN196 | B | TYR178 | 2.89 | Hydrogen bond |
| Chain A↔Chain B | A | GLN196 | B | TRP108 | 3.02 | Hydrogen bond |
| Chain A↔Chain B | A | ASN249 | B | GLU119 | 2.81 | Hydrogen bond |
| Chain A↔Chain B | A | LYS7 | B | LEU20 | 2.85 | Hydrogen bond |
| Chain A↔Chain B | A | LYS7 | B | SER51 | 2.99 | Hydrogen bond |
| Chain A↔Chain B | A | GLN10 | B | GLN98 | 2.84 | Hydrogen bond |
| Chain A↔Chain B | A | GLN10 | B | HIS54 | 3.48 | Hydrogen bond |
| Chain A↔Chain B | A | LEU13 | B | ASN99 | 2.94 | Hydrogen bond |
| Chain A↔Chain B | A | GLU36 | B | GLY122 | 3.44 | Hydrogen bond |
| Chain A↔Chain B | A | ILE81 | B | LYS159 | 3.32 | Hydrogen bond |
| Chain A↔Chain B | A | THR83 | B | TYR135 | 3.14 | Hydrogen bond |
| Chain A↔Chain B | A | ILE85 | B | ASN133 | 3.01 | Hydrogen bond |
| Chain A↔Chain B | A | ARG88 | B | ILE107 | 2.81 | Hydrogen bond |
| Chain A↔Chain B | A | ARG204 | B | PHE120 | 3.23 | Hydrogen bond |
| Chain A↔Chain B | A | ILE15 | B | ILE176 | 2.86 | Hydrogen bond (Hydrophobic) |
| Chain A↔Chain B | A | LEU61 | B | LEU170 | 2.78 | Hydrogen bond (Hydrophobic) |
| Chain A↔Chain B | A | LEU63 | B | GLN168 | 2.82 | Hydrogen bond |
| Chain A↔Chain B | A | VAL194 | B | ALA127 | 3.13 | Hydrogen bond (Hydrophobic) |
| Chain A↔Chain B | A | GLN196 | B | LEU125 | 2.88 | Hydrogen bond |
| Chain A↔Chain B | A | PHE198 | B | ILE123 | 2.88 | Hydrogen bond (Hydrophobic) |
| Chain A↔Chain B | A | GLU73 | B | LYS87 | 3.58 | Salt bridge (Electrostatic) |
| Chain A↔Chain B | A | LYS57 | B | ASP172 | 5.74 | Electrostatic |
| Chain A↔Chain B | A | ARG214 | B | GLU116 | 5.67 | Electrostatic |
| Chain A↔Chain B | A | PHE3 | B | LEU43 |  | Hydrophobic |
| Chain A↔Chain B | A | PHE3 | B | VAL141 |  | Hydrophobic |
| Chain A↔Chain B | A | PHE3 | B | LEU143 |  | Hydrophobic |
| Chain A↔Chain B | A | ILE6 | B | ILE45 |  | Hydrophobic |
| Chain A↔Chain B | A | ILE6 | B | LEU43 |  | Hydrophobic |
| Chain A↔Chain B | A | ALA14 | B | TYR97 |  | Hydrophobic |
| Chain A↔Chain B | A | ALA14 | B | VAL175 |  | Hydrophobic |
| Chain A↔Chain B | A | ALA16 | B | VAL175 |  | Hydrophobic |
| Chain A↔Chain B | A | PRO17 | B | ILE176 |  | Hydrophobic |
| Chain A↔Chain B | A | PRO17 | B | LEU170 |  | Hydrophobic |
| Chain A↔Chain B | A | LEU20 | B | LEU170 |  | Hydrophobic |
| Chain A↔Chain B | A | PHE67 | B | LEU162 |  | Hydrophobic |
| Chain A↔Chain B | A | PHE67 | B | LEU165 |  | Hydrophobic |
| Chain A↔Chain B | A | ILE85 | B | PRO131 |  | Hydrophobic |
| Chain A↔Chain B | A | VAL153 | B | ILE176 |  | Hydrophobic |
| Chain A↔Chain B | A | TYR154 | B | VAL124 |  | Hydrophobic |
| Chain A↔Chain B | A | TRP155 | B | TRP108 |  | Hydrophobic |
| Chain A↔Chain B | A | TRP155 | B | ILE176 |  | Hydrophobic |
| Chain A↔Chain B | A | TRP155 | B | LEU170 |  | Hydrophobic |
| Chain A↔Chain B | A | VAL194 | B | TRP108 |  | Hydrophobic |
| Chain A↔Chain B | A | ALA195 | B | VAL124 |  | Hydrophobic |
| Chain A↔Chain B | A | PHE198 | B | LEU104 |  | Hydrophobic |
| Chain A↔Chain B | A | TRP203 | B | ILE123 |  | Hydrophobic |
| Chain A↔Chain B | A | VAL207 | B | PRO117 |  | Hydrophobic |
| Chain A↔Chain B | A | VAL207 | B | ILE123 |  | Hydrophobic |
| Chain A↔Chain B | A | PHE212 | B | ILE115 |  | Hydrophobic |
| Chain A↔Chain B | A | PHE212 | B | ILE123 |  | Hydrophobic |
| Chain A↔Chain B | A | PHE212 | B | PHE112 |  | Hydrophobic |
| Chain A↔Chain B | A | PHE212 | B | LEU104 |  | Hydrophobic |
| Chain A↔Chain B | A | PHE212 | B | LEU125 |  | Hydrophobic |
| Chain A↔Chain B | A | ILE248 | B | PRO117 |  | Hydrophobic |
| Chain A↔Chain F | A | ASN19 | F | LYS7 | 2.96 | Hydrogen bond |
| Chain A↔Chain F | A | TRP108 | F | GLN196 | 3.20 | Hydrogen bond |
| Chain A↔Chain F | A | GLU116 | F | ARG214 | 2.95 | Salt bridge (Electrostatic, Hydrogen bond) |
| Chain A↔Chain F | A | SER118 | F | GLU36 | 2.88 | Hydrogen bond |
| Chain A↔Chain F | A | TYR178 | F | GLN196 | 2.92 | Hydrogen bond |
| Chain A↔Chain F | A | LYS183 | F | ASP71 | 2.88 | Salt bridge (Electrostatic, Hydrogen bond) |
| Chain A↔Chain F | A | LYS183 | F | THR83 | 2.99 | Hydrogen bond |
| Chain A↔Chain F | A | ARG186 | F | GLU77 | 3.14 | Salt bridge (Electrostatic, Hydrogen bond) |
| Chain A↔Chain F | A | SER193 | F | GLU79 | 2.88 | Hydrogen bond |
| Chain A↔Chain F | A | SER51 | F | LYS7 | 2.94 | Hydrogen bond |
| Chain A↔Chain F | A | GLN98 | F | GLN10 | 2.87 | Hydrogen bond |
| Chain A↔Chain F | A | ASN99 | F | LEU13 | 2.79 | Hydrogen bond |
| Chain A↔Chain F | A | ARG101 | F | GLY211 | 2.97 | Hydrogen bond |
| Chain A↔Chain F | A | ILE107 | F | ARG88 | 3.41 | Hydrogen bond |
| Chain A↔Chain F | A | PHE120 | F | ARG204 | 3.13 | Hydrogen bond (Cation–π) |
| Chain A↔Chain F | A | GLY121 | F | TRP203 | 3.31 | Hydrogen bond |
| Chain A↔Chain F | A | ASN133 | F | ILE85 | 2.92 | Hydrogen bond |
| Chain A↔Chain F | A | TYR135 | F | THR83 | 3.18 | Hydrogen bond |
| Chain A↔Chain F | A | ASP166 | F | ASN65 | 2.99 | Hydrogen bond |
| Chain A↔Chain F | A | ASN167 | F | ASN65 | 3.12 | Hydrogen bond |
| Chain A↔Chain F | A | ARG101 | F | ALA210 | 2.88 | Hydrogen bond |
| Chain A↔Chain F | A | GLU119 | F | ASN249 | 3.08 | Hydrogen bond |
| Chain A↔Chain F | A | ILE123 | F | PHE198 | 2.86 | Hydrogen bond (Hydrophobic) |
| Chain A↔Chain F | A | LEU125 | F | GLN196 | 2.88 | Hydrogen bond |
| Chain A↔Chain F | A | ALA127 | F | VAL194 | 3.01 | Hydrogen bond (Hydrophobic) |
| Chain A↔Chain F | A | GLN168 | F | LEU63 | 2.77 | Hydrogen bond |
| Chain A↔Chain F | A | LEU170 | F | LEU61 | 2.82 | Hydrogen bond (Hydrophobic) |
| Chain A↔Chain F | A | ILE176 | F | ILE15 | 2.86 | Hydrogen bond (Hydrophobic) |
| Chain A↔Chain F | A | LYS87 | F | GLU73 | 3.54 | Salt bridge (Electrostatic) |
| Chain A↔Chain F | A | LYS50 | F | ASP8 | 5.17 | Electrostatic |
| Chain A↔Chain F | A | ASP172 | F | LYS57 | 5.66 | Electrostatic |
| Chain A↔Chain F | A | LEU23 | F | ILE6 |  | Hydrophobic |
| Chain A↔Chain F | A | LEU43 | F | ILE6 |  | Hydrophobic |
| Chain A↔Chain F | A | ILE45 | F | ILE6 |  | Hydrophobic |
| Chain A↔Chain F | A | TYR97 | F | ALA14 |  | Hydrophobic |
| Chain A↔Chain F | A | LEU104 | F | PHE212 |  | Hydrophobic |
| Chain A↔Chain F | A | LEU104 | F | PHE198 |  | Hydrophobic |
| Chain A↔Chain F | A | TRP108 | F | VAL194 |  | Hydrophobic |
| Chain A↔Chain F | A | PHE112 | F | PHE212 |  | Hydrophobic |
| Chain A↔Chain F | A | PRO117 | F | ILE248 |  | Hydrophobic |
| Chain A↔Chain F | A | PRO117 | F | PHE212 |  | Hydrophobic |
| Chain A↔Chain F | A | PRO117 | F | VAL207 |  | Hydrophobic |
| Chain A↔Chain F | A | ILE123 | F | PHE212 |  | Hydrophobic |
| Chain A↔Chain F | A | ILE123 | F | TRP203 |  | Hydrophobic |
| Chain A↔Chain F | A | VAL124 | F | ALA195 |  | Hydrophobic |
| Chain A↔Chain F | A | VAL124 | F | TYR154 |  | Hydrophobic |
| Chain A↔Chain F | A | LEU125 | F | PHE212 |  | Hydrophobic |
| Chain A↔Chain F | A | PRO131 | F | ILE85 |  | Hydrophobic |
| Chain A↔Chain F | A | VAL141 | F | PHE3 |  | Hydrophobic |
| Chain A↔Chain F | A | LEU143 | F | PHE3 |  | Hydrophobic |
| Chain A↔Chain F | A | TRP152 | F | PHE3 |  | Hydrophobic |
| Chain A↔Chain F | A | LEU162 | F | PHE67 |  | Hydrophobic |
| Chain A↔Chain F | A | LEU165 | F | PHE67 |  | Hydrophobic |
| Chain A↔Chain F | A | LEU170 | F | TRP155 |  | Hydrophobic |
| Chain A↔Chain F | A | LEU170 | F | PRO17 |  | Hydrophobic |
| Chain A↔Chain F | A | LEU170 | F | LEU63 |  | Hydrophobic |
| Chain A↔Chain F | A | LEU170 | F | LEU20 |  | Hydrophobic |
| Chain A↔Chain F | A | VAL175 | F | ALA14 |  | Hydrophobic |
| Chain A↔Chain F | A | VAL175 | F | ALA16 |  | Hydrophobic |
| Chain A↔Chain F | A | ILE176 | F | TRP155 |  | Hydrophobic |
| Chain A↔Chain F | A | ILE176 | F | PRO17 |  | Hydrophobic |
| Chain A↔Chain F | A | ILE176 | F | VAL153 |  | Hydrophobic |
| Chain A↔Chain F | A | HIS54 | F | LYS7 | 5.31 | Cation–π |

**Supplementary Tables 3b**

**gp17 (DTP) chain G-gp13 (TTP) /gp18 (BHP)/26 (BppU) inter-complex**

| **Interface** | **Chain1** | **gp13** | **Chain2** | **gp17** | **Disatnce (Å)** | **Bond type** |
| --- | --- | --- | --- | --- | --- | --- |
| Chain C↔Chain G | C | GLU73 | G | LYS126 | 3.05 | Salt bridge (Electrostatic, Hydrogen bond) |
| Chain C↔Chain G | C | PRO78 | G | LYS126 | 2.93 | Hydrogen bond |
| Chain C↔Chain G | C | TYR75 | G | PRO128 |  | Hydrophobic |
| Chain C↔Chain G | C | PRO78 | G | LEU130 |  | Hydrophobic |
| Chain D↔Chain G | D | LYS70 | G | GLU135 | 3.25 | Salt bridge (Electrostatic, Hydrogen bond) |
| Chain D↔Chain G | D | ARG82 | G | ASP133 | 2.86 | Salt bridge (Electrostatic, Hydrogen bond) |
| Chain D↔Chain G | D | TYR75 | G | SER20 | 2.77 | Hydrogen bond |
| Chain D↔Chain G | D | ARG82 | G | GLY73 | 3.22 | Hydrogen bond |
| Chain D↔Chain G | D | TYR75 | G | LEU31 | 2.89 | Hydrogen bond (Hydrophobic) |
| Chain D↔Chain G | D | ARG82 | G | GLU75 | 3.65 | Salt bridge (Electrostatic) |
| Chain D↔Chain G | D | TYR75 | G | VAL35 |  | Hydrophobic |
| Chain D↔Chain G | D | TYR75 | G | ILE7 |  | Hydrophobic |

| **Interface** | **Chain1** | **gp17** | **Chain2** | **gp18** | **Disatnce (Å)** | **Bond type** |
| --- | --- | --- | --- | --- | --- | --- |
| Chain G↔Chain N | G | GLN55 | N | ASP488 | 3.26 | Hydrogen bond |
| Chain G↔Chain N | G | ARG60 | N | ASN530 | 3.36 | Hydrogen bond |
| Chain G↔Chain N | G | GLU205 | N | TYR16 | 2.81 | Hydrogen bond |
| Chain G↔Chain N | G | ASP250 | N | ARG49 | 3.10 | Salt bridge (Electrostatic, Hydrogen bond) |
| Chain G↔Chain N | G | LYS44 | N | ASP533 | 2.92 | Hydrogen bond |
| Chain G↔Chain N | G | ARG60 | N | ASP529 | 3.24 | Hydrogen bond |
| Chain G↔Chain N | G | ARG230 | N | ARG75 | 2.81 | Hydrogen bond |
| Chain G↔Chain N | G | MET200 | N | HIS28 | 3.10 | Hydrogen bond |
| Chain G↔Chain N | G | GLU205 | N | ARG20 | 5.69 | Electrostatic |
| Chain G↔Chain N | G | LYS247 | N | ASP259 | 5.74 | Electrostatic |
| Chain G↔Chain N | G | LEU46 | N | PRO536 |  | Hydrophobic |
| Chain G↔Chain N | G | PRO51 | N | TRP359 |  | Hydrophobic |
| Chain G↔Chain N | G | PRO51 | N | PRO361 |  | Hydrophobic |
| Chain G↔Chain N | G | PHE52 | N | TRP359 |  | Hydrophobic |
| Chain G↔Chain N | G | ALA57 | N | PRO536 |  | Hydrophobic |
| Chain G↔Chain N | G | ALA202 | N | ALA27 |  | Hydrophobic |
| Chain G↔Chain N | G | PHE201 | N | HIS28 | 5.89 | π–π stacking |
| Chain G↔Chain N | G | HIS244 | N | TYR93 | 6.45 | π–π stacking |

| **Interface** | **Chain1** | **gp17** | **Chain2** | **gp26** | **Disatnce (Å)** | **Bond type** |
| --- | --- | --- | --- | --- | --- | --- |
| Chain G↔Chain S | G | ASP207 | S | TYR200 | 2.92 | Hydrogen bond |
| Chain G↔Chain S | G | MET206 | S | TYR288 | 2.87 | Hydrogen bond |
| Chain G↔Chain S | G | GLY209 | S | TYR288 | 3.16 | Hydrogen bond |
| Chain G↔Chain S | G | THR211 | S | ASN201 | 3.04 | Hydrogen bond |
| Chain G↔Chain S | G | ARG301 | S | ASP107 | 4.63 | Electrostatic |
| Chain G↔Chain S | G | MET206 | S | PHE170 |  | Hydrophobic |
| Chain G↔Chain S | G | PRO264 | S | PHE286 |  | Hydrophobic |
| Chain G↔Chain S | G | ARG164 | S | PHE286 | 4.99 | Cation–π |
| Chain G↔Chain b | G | ASP107 | b | HIS74 | 2.91 | Hydrogen bond |
| Chain G↔Chain b | G | ARG296 | b | THR99 | 3.14 | Hydrogen bond |
| Chain G↔Chain b | G | SER106 | b | ARG104 | 3.17 | Hydrogen bond |
| Chain G↔Chain b | G | ASP107 | b | ARG104 | 3.44 | Hydrogen bond |
| Chain G↔Chain b | G | ASP152 | b | ASP107 | 2.87 | Hydrogen bond |
| Chain G↔Chain b | G | HIS298 | b | SER43 | 3.48 | Hydrogen bond |
| Chain G↔Chain b | G | ILE300 | b | SER43 | 2.87 | Hydrogen bond |
| Chain G↔Chain b | G | VAL153 | b | ASP107 | 3.09 | Hydrogen bond |
| Chain G↔Chain b | G | VAL153 | b | ALA108 |  | Hydrophobic |
| Chain G↔Chain b | G | VAL153 | b | PRO109 |  | Hydrophobic |
| Chain G↔Chain b | G | ILE155 | b | PRO109 |  | Hydrophobic |
| Chain G↔Chain b | G | ILE300 | b | ALA76 |  | Hydrophobic |
| Chain G↔Chain b | G | ILE300 | b | PRO73 |  | Hydrophobic |
| Chain G↔Chain b | G | TYR4 | b | ARG101 | 4.45 | Cation–π |
| Chain G↔Chain b | G | ARG296 | b | HIS74 | 5.20 | Cation–π |
| Chain G↔Chain c | G | ASP80 | c | ARG101 | 2.73 | Salt bridge (Electrostatic, Hydrogen bond) |
| Chain G↔Chain c | G | THR84 | c | THR97 | 3.42 | Hydrogen bond |
| Chain G↔Chain c | G | TRP77 | c | LEU7 |  | Hydrophobic |
| Chain G↔Chain c | G | VAL85 | c | LEU7 |  | Hydrophobic |
| Chain G↔Chain c | G | HIS74 | c | LYS2 | 5.85 | Cation–π |
| Chain G↔Chain d | G | LYS6 | d | THR97 | 2.85 | Hydrogen bond |
| Chain G↔Chain d | G | ASN238 | d | ARG126 | 3.07 | Hydrogen bond |
| Chain G↔Chain d | G | ASP13 | d | ARG104 | 2.85 | Hydrogen bond (Electrostatic) |
| Chain G↔Chain d | G | GLY14 | d | ARG104 | 3.06 | Hydrogen bond |
| Chain G↔Chain d | G | ASP239 | d | ARG132 | 3.68 | Salt bridge (Electrostatic) |
| Chain G↔Chain d | G | PRO241 | d | ILE128 |  | Hydrophobic |

**Supplementary Tables 3b**

**gp17 (DTP) chain G interactions (Intra)**

| **Interface** | **Chain1** | **gp17** | **Chain2** | **gp17** | **Disatnce (Å)** | **Bond type** |
| --- | --- | --- | --- | --- | --- | --- |
| Chain G↔Chain H | G | ARG63 | H | GLU54 | 3.48 | Salt bridge (Electrostatic, Hydrogen bond) |
| Chain G↔Chain H | G | ASP80 | H | ARG296 | 3.09 | Salt bridge (Electrostatic, Hydrogen bond) |
| Chain G↔Chain H | G | THR84 | H | ARG296 | 3.12 | Hydrogen bond |
| Chain G↔Chain H | G | ASP86 | H | ARG292 | 3.35 | Salt bridge (Electrostatic, Hydrogen bond) |
| Chain G↔Chain H | G | SER87 | H | HIS298 | 2.94 | Hydrogen bond |
| Chain G↔Chain H | G | ASP96 | H | TYR56 | 2.77 | Hydrogen bond |
| Chain G↔Chain H | G | ASP96 | H | LYS59 | 2.79 | Salt bridge (Electrostatic, Hydrogen bond) |
| Chain G↔Chain H | G | TYR123 | H | TRP294 | 3.08 | Hydrogen bond (Hydrophobic, π–π stacking) |
| Chain G↔Chain H | G | ASP127 | H | SER2 | 2.95 | Hydrogen bond |
| Chain G↔Chain H | G | SER87 | H | ARG296 | 3.01 | Hydrogen bond |
| Chain G↔Chain H | G | LEU117 | H | THR45 | 2.84 | Hydrogen bond |
| Chain G↔Chain H | G | GLU119 | H | VAL43 | 3.04 | Hydrogen bond |
| Chain G↔Chain H | G | VAL61 | H | GLY53 | 3.37 | Hydrogen bond |
| Chain G↔Chain H | G | ALA125 | H | ASN34 | 3.15 | Hydrogen bond |
| Chain G↔Chain H | G | ARG90 | H | ASP40 | 3.97 | Salt bridge (Electrostatic) |
| Chain G↔Chain H | G | GLU119 | H | ARG62 | 3.90 | Salt bridge (Electrostatic) |
| Chain G↔Chain H | G | ARG90 | H | ASP174 | 5.90 | Electrostatic |
| Chain G↔Chain H | G | VAL61 | H | PHE52 |  | Hydrophobic |
| Chain G↔Chain H | G | PRO79 | H | TYR4 |  | Hydrophobic |
| Chain G↔Chain H | G | TYR95 | H | VAL43 |  | Hydrophobic |
| Chain G↔Chain H | G | LEU117 | H | TRP47 |  | Hydrophobic |
| Chain G↔Chain H | G | TYR123 | H | ILE39 |  | Hydrophobic |
| Chain G↔Chain H | G | PRO128 | H | TRP294 |  | Hydrophobic |
| Chain G↔Chain H | G | PHE129 | H | VAL5 |  | Hydrophobic |
| Chain G↔Chain H | G | PHE129 | H | TRP294 | 5.46 | Hydrophobic (π–π stacking) |
| Chain G↔Chain H | G | PHE129 | H | TYR4 | 5.63 | Hydrophobic (π–π stacking) |
| Chain G↔Chain H | G | VAL141 | H | TRP47 |  | Hydrophobic |
| Chain G↔Chain H | G | PHE144 | H | PHE52 | 5.19 | Hydrophobic (π–π stacking) |
| Chain G↔Chain H | G | PRO145 | H | PHE52 |  | Hydrophobic |
| Chain G↔Chain H | G | TYR146 | H | PHE52 | 6.05 | Hydrophobic (π–π stacking) |
| Chain G↔Chain H | G | TRP178 | H | PHE52 |  | Hydrophobic |
| Chain G↔Chain H | G | TRP289 | H | PHE52 | 5.70 | Hydrophobic (π–π stacking) |
| Chain G↔Chain H | G | TRP91 | H | HIS298 | 4.96 | π–π stacking |
| Chain G↔Chain H | G | TYR123 | H | ARG292 | 5.42 | Cation–π |
| Chain G↔Chain H | G | ARG230 | H | PHE52 | 4.14 | Cation–π |
| Chain G↔Chain L | G | SER2 | L | ASP127 | 2.80 | Hydrogen bond |
| Chain G↔Chain L | G | GLU54 | L | ARG63 | 3.02 | Salt bridge (Electrostatic, Hydrogen bond) |
| Chain G↔Chain L | G | TYR56 | L | ASP96 | 3.30 | Hydrogen bond |
| Chain G↔Chain L | G | LYS59 | L | ASP96 | 2.82 | Salt bridge (Electrostatic, Hydrogen bond) |
| Chain G↔Chain L | G | ARG292 | L | ASP86 | 3.38 | Salt bridge (Electrostatic, Hydrogen bond) |
| Chain G↔Chain L | G | ARG292 | L | TYR123 | 3.41 | Hydrogen bond (Cation–π) |
| Chain G↔Chain L | G | TRP294 | L | TYR123 | 3.35 | Hydrogen bond (Hydrophobic, π–π stacking) |
| Chain G↔Chain L | G | ARG296 | L | THR84 | 3.03 | Hydrogen bond |
| Chain G↔Chain L | G | HIS298 | L | ASP13 | 2.90 | Hydrogen bond |
| Chain G↔Chain L | G | VAL43 | L | GLU119 | 3.32 | Hydrogen bond |
| Chain G↔Chain L | G | THR45 | L | LEU117 | 2.90 | Hydrogen bond |
| Chain G↔Chain L | G | TYR56 | L | GLU143 | 3.05 | Hydrogen bond |
| Chain G↔Chain L | G | TYR56 | L | TYR95 | 3.35 | Hydrogen bond |
| Chain G↔Chain L | G | ARG296 | L | ASP80 | 2.98 | Salt bridge (Electrostatic, Hydrogen bond) |
| Chain G↔Chain L | G | ARG296 | L | SER87 | 3.14 | Hydrogen bond |
| Chain G↔Chain L | G | ASN34 | L | ALA125 | 3.05 | Hydrogen bond |
| Chain G↔Chain L | G | GLY53 | L | VAL61 | 3.10 | Hydrogen bond |
| Chain G↔Chain L | G | ARG62 | L | GLU119 | 4.00 | Salt bridge (Electrostatic) |
| Chain G↔Chain L | G | ASP40 | L | ARG90 | 5.21 | Electrostatic |
| Chain G↔Chain L | G | LYS59 | L | ASP94 | 5.89 | Electrostatic |
| Chain G↔Chain L | G | TYR4 | L | PHE129 | 6.14 | Hydrophobic (π–π stacking) |
| Chain G↔Chain L | G | TYR4 | L | PRO79 |  | Hydrophobic |
| Chain G↔Chain L | G | VAL5 | L | PHE129 |  | Hydrophobic |
| Chain G↔Chain L | G | ILE39 | L | ALA122 |  | Hydrophobic |
| Chain G↔Chain L | G | ILE39 | L | TYR123 |  | Hydrophobic |
| Chain G↔Chain L | G | VAL43 | L | TYR95 |  | Hydrophobic |
| Chain G↔Chain L | G | TRP47 | L | LEU117 |  | Hydrophobic |
| Chain G↔Chain L | G | TRP47 | L | VAL141 |  | Hydrophobic |
| Chain G↔Chain L | G | PRO51 | L | PRO229 |  | Hydrophobic |
| Chain G↔Chain L | G | PHE52 | L | VAL61 |  | Hydrophobic |
| Chain G↔Chain L | G | PHE52 | L | TRP178 |  | Hydrophobic |
| Chain G↔Chain L | G | PHE52 | L | PRO229 |  | Hydrophobic |
| Chain G↔Chain L | G | PHE52 | L | PHE144 | 5.41 | Hydrophobic (π–π stacking) |
| Chain G↔Chain L | G | PHE52 | L | TYR146 | 6.00 | Hydrophobic (π–π stacking) |
| Chain G↔Chain L | G | PHE52 | L | TRP289 | 5.71 | Hydrophobic (π–π stacking) |
| Chain G↔Chain L | G | PHE52 | L | PRO145 |  | Hydrophobic |
| Chain G↔Chain L | G | TRP294 | L | PRO128 |  | Hydrophobic |
| Chain G↔Chain L | G | TRP294 | L | PHE129 | 5.16 | Hydrophobic (π–π stacking) |
| Chain G↔Chain L | G | PHE52 | L | ARG230 | 5.13 | Cation–π |
| Chain G↔Chain L | G | HIS298 | L | ARG12 | 5.76 | Cation–π |

**Supplementary Tables 3c**

**gp18 (BHP) chain M-gp17 (DTP)/gp20 (CFP)/gp26 (BppU) inter-complex interactions**

| **Interface** | **Chain1** | **gp17** | **Chain2** | **gp18** | **Disatnce (Å)** | **Bond type** |
| --- | --- | --- | --- | --- | --- | --- |
| Chain H↔Chain M | H | LYS59 | M | GLU358 | 3.42 | Salt bridge (Electrostatic, Hydrogen bond) |
| Chain H↔Chain M | H | LYS157 | M | ASP4 | 2.87 | Salt bridge (Electrostatic, Hydrogen bond) |
| Chain H↔Chain M | H | THR182 | M | ASP11 | 2.72 | Hydrogen bond |
| Chain H↔Chain M | H | ASN238 | M | SER340 | 3.12 | Hydrogen bond |
| Chain H↔Chain M | H | ASP239 | M | HIS21 | 3.08 | Hydrogen bond |
| Chain H↔Chain M | H | HIS244 | M | TRP351 | 3.42 | Hydrogen bond |
| Chain H↔Chain M | H | LYS247 | M | GLN349 | 3.32 | Hydrogen bond |
| Chain H↔Chain M | H | LYS283 | M | ASP11 | 2.74 | Salt bridge (Electrostatic, Hydrogen bond) |
| Chain H↔Chain M | H | ARG203 | M | GLN513 | 3.27 | Hydrogen bond |
| Chain H↔Chain M | H | GLN232 | M | ARG18 | 2.75 | Hydrogen bond |
| Chain H↔Chain M | H | ASP239 | M | GLY341 | 2.92 | Hydrogen bond |
| Chain H↔Chain M | H | HIS244 | M | LEU343 | 3.38 | Hydrogen bond |
| Chain H↔Chain M | H | HIS244 | M | GLY344 | 3.42 | Hydrogen bond |
| Chain H↔Chain M | H | ASN249 | M | ARG355 | 3.31 | Hydrogen bond |
| Chain H↔Chain M | H | ASN278 | M | MET1 | 3.17 | Hydrogen bond |
| Chain H↔Chain M | H | GLY279 | M | TRP2 | 3.22 | Hydrogen bond |
| Chain H↔Chain M | H | ASN278 | M | TRP2 | 3.48 | Hydrogen bond |
| Chain H↔Chain M | H | LYS247 | M | ASP329 | 3.93 | Salt bridge (Electrostatic) |
| Chain H↔Chain M | H | ARG60 | M | GLU358 | 5.94 | Electrostatic |
| Chain H↔Chain M | H | ASP226 | M | ARG18 | 5.85 | Electrostatic |
| Chain H↔Chain M | H | ASP250 | M | ARG355 | 5.58 | Electrostatic |
| Chain H↔Chain M | H | VAL153 | M | TRP8 |  | Hydrophobic |
| Chain H↔Chain M | H | ILE155 | M | LEU7 |  | Hydrophobic |
| Chain H↔Chain M | H | PRO159 | M | MET1 |  | Hydrophobic |
| Chain H↔Chain M | H | PRO176 | M | TRP359 |  | Hydrophobic |
| Chain H↔Chain M | H | TRP178 | M | TRP359 | 5.79 | Hydrophobic (π–π stacking) |
| Chain H↔Chain M | H | PRO186 | M | TRP2 |  | Hydrophobic |
| Chain H↔Chain M | H | PRO229 | M | TRP359 |  | Hydrophobic |
| Chain H↔Chain M | H | VAL235 | M | TYR17 |  | Hydrophobic |
| Chain H↔Chain M | H | ALA237 | M | ILE10 |  | Hydrophobic |
| Chain H↔Chain M | H | PRO241 | M | TRP342 |  | Hydrophobic |
| Chain H↔Chain M | H | LEU252 | M | VAL303 |  | Hydrophobic |
| Chain H↔Chain M | H | ALA281 | M | LEU7 |  | Hydrophobic |
| Chain H↔Chain M | H | ALA281 | M | TRP2 |  | Hydrophobic |
| Chain H↔Chain M | H | HIS222 | M | TRP2 | 5.16 | π–π stacking |
| Chain H↔Chain M | H | HIS244 | M | HIS496 | 6.56 | π–π stacking |
| Chain H↔Chain M | H | LYS218 | M | TYR338 | 5.04 | Cation–π |
| Chain H↔Chain M | H | LYS247 | M | PHE298 | 4.49 | Cation–π |
| Chain I↔Chain M | I | ASP199 | M | SER23 | 3.34 | Hydrogen bond |
| Chain I↔Chain M | I | LYS247 | M | ASP259 | 3.24 | Salt bridge (Electrostatic, Hydrogen bond) |
| Chain I↔Chain M | I | ASP250 | M | ARG49 | 2.97 | Salt bridge (Electrostatic, Hydrogen bond) |
| Chain I↔Chain M | I | LYS44 | M | GLY532 | 2.95 | Hydrogen bond |
| Chain I↔Chain M | I | LYS44 | M | ASP533 | 3.48 | Hydrogen bond |
| Chain I↔Chain M | I | ARG60 | M | THR53 | 3.43 | Hydrogen bond |
| Chain I↔Chain M | I | ARG230 | M | ARG75 | 2.94 | Hydrogen bond |
| Chain I↔Chain M | I | MET200 | M | HIS28 | 3.39 | Hydrogen bond |
| Chain I↔Chain M | I | GLU205 | M | ARG20 | 3.99 | Salt bridge (Electrostatic) |
| Chain I↔Chain M | I | LEU46 | M | PRO536 |  | Hydrophobic |
| Chain I↔hain M | I | PRO51 | M | PRO361 |  | Hydrophobic |
| Chain I↔Chain M | I | PHE52 | M | TRP359 |  | Hydrophobic |
| Chain I↔hain M | I | ALA57 | M | PRO536 |  | Hydrophobic |
| Chain I↔Chain M | I | ALA202 | M | ALA27 |  | Hydrophobic |
| Chain I↔hain M | I | ALA202 | M | MET24 |  | Hydrophobic |
| Chain I↔Chain M | I | PHE201 | M | HIS28 | 6.04 | π–π stacking |
| Chain I↔Chain M | I | HIS244 | M | TYR93 | 6.37 | π–π stacking |
| Chain J↔Chain M | J | GLN55 | M | ARG75 | 2.91 | Hydrogen bond |
| Chain J↔Chain M | J | LYS44 | M | ASP124 | 2.89 | Hydrogen bond |
| Chain J↔Chain M | J | LEU46 | M | ALA126 |  | Hydrophobic |
| Chain J↔Chain M | J | PRO49 | M | ILE56 |  | Hydrophobic |

| **Interface** | **Chain1** | **gp18** | **Chain2** | **gp20** | **Disatnce (Å)** | **Bond type** |
| --- | --- | --- | --- | --- | --- | --- |
| Chain M↔Chain P | M | ASP192 | P | THR23 | 2.93 | Hydrogen bond |
| Chain M↔Chain P | M | ASN148 | P | LEU25 | 3.39 | Hydrogen bond |
| Chain M↔Chain P | M | THR227 | P | ALA2 | 2.80 | Hydrogen bond |
| Chain M↔Chain P | M | ASP246 | P | ALA2 | 3.13 | Hydrogen bond |
| Chain M↔Chain P | M | ASP246 | P | GLY3 | 3.22 | Hydrogen bond |
| Chain M↔Chain P | M | SER467 | P | GLY3 | 3.24 | Hydrogen bond |
| Chain M↔Chain P | M | MET163 | P | ILE18 | 2.88 | Hydrogen bond |
| Chain M↔Chain P | M | ALA165 | P | ILE18 | 2.92 | Hydrogen bond |
| Chain M↔Chain P | M | ASP192 | P | VAL22 | 3.34 | Hydrogen bond |
| Chain M↔Chain P | M | TRP226 | P | LEU4 | 2.88 | Hydrogen bond (Hydrophobic) |
| Chain M↔Chain P | M | ASP242 | P | ALA2 | 3.46 | Hydrogen bond |
| Chain M↔Chain P | M | LEU463 | P | ASP12 | 3.24 | Hydrogen bond |
| Chain M↔Chain P | M | PRO149 | P | LEU25 |  | Hydrophobic |
| Chain M↔Chain P | M | PHE150 | P | ALA26 |  | Hydrophobic |
| Chain M↔Chain P | M | PHE150 | P | LEU25 |  | Hydrophobic |
| Chain M↔Chain P | M | PHE156 | P | VAL33 |  | Hydrophobic |
| Chain M↔Chain P | M | PHE158 | P | VAL33 |  | Hydrophobic |
| Chain M↔Chain P | M | PHE158 | P | TYR16 | 5.19 | Hydrophobic (π–π stacking) |
| Chain M↔Chain P | M | PHE162 | P | ILE18 |  | Hydrophobic |
| Chain M↔Chain P | M | PHE162 | P | LEU25 |  | Hydrophobic |
| Chain M↔Chain P | M | MET163 | P | TYR16 |  | Hydrophobic |
| Chain M↔Chain P | M | MET163 | P | VAL17 |  | Hydrophobic |
| Chain M↔Chain P | M | LEU164 | P | ILE18 |  | Hydrophobic |
| Chain M↔Chain P | M | ALA165 | P | LEU11 |  | Hydrophobic |
| Chain M↔Chain P | M | ALA165 | P | VAL17 |  | Hydrophobic |
| Chain M↔Chain P | M | MET174 | P | VAL22 |  | Hydrophobic |
| Chain M↔Chain P | M | LEU178 | P | VAL22 |  | Hydrophobic |
| Chain M↔Chain P | M | LEU178 | P | LEU25 |  | Hydrophobic |
| Chain M↔Chain P | M | LEU190 | P | VAL22 |  | Hydrophobic |
| Chain M↔Chain P | M | PRO194 | P | VAL22 |  | Hydrophobic |
| Chain M↔Chain P | M | PHE228 | P | LEU11 |  | Hydrophobic |
| Chain M↔Chain P | M | PHE228 | P | VAL17 |  | Hydrophobic |
| Chain M↔Chain P | M | PHE228 | P | LEU4 |  | Hydrophobic |
| Chain M↔Chain P | M | TYR314 | P | PRO5 |  | Hydrophobic |
| Chain M↔Chain P | M | PHE318 | P | PRO5 |  | Hydrophobic |
| Chain M↔Chain P | M | ALA399 | P | LEU48 |  | Hydrophobic |
| Chain M↔Chain P | M | TYR403 | P | ALA51 |  | Hydrophobic |
| Chain M↔Chain P | M | PHE404 | P | ALA51 |  | Hydrophobic |
| Chain M↔Chain P | M | PHE404 | P | TYR54 | 6.56 | Hydrophobic (π–π stacking) |
| Chain M↔Chain P | M | PHE404 | P | PRO50 |  | Hydrophobic |
| Chain M↔Chain P | M | LEU406 | P | ILE59 |  | Hydrophobic |
| Chain M↔Chain P | M | LEU406 | P | TYR54 |  | Hydrophobic |
| Chain M↔Chain P | M | ALA407 | P | TYR54 |  | Hydrophobic |
| Chain M↔Chain P | M | ALA464 | P | LEU11 |  | Hydrophobic |
| Chain M↔Chain P | M | ALA464 | P | LEU4 |  | Hydrophobic |
| Chain M↔Chain P | M | LEU466 | P | LEU4 |  | Hydrophobic |
| Chain M↔Chain P | M | LEU466 | P | PRO5 |  | Hydrophobic |
| Chain M↔Chain P | M | PHE158 | P | HIS37 | 5.63 | π–π stacking |
| Chain M↔Chain R | M | GLY402 | R | ASN46 | 3.11 | Hydrogen bond |
| Chain M↔Chain R | M | ILE415 | R | ARG38 | 2.79 | Hydrogen bond |
| Chain M↔Chain R | M | ILE401 | R | VAL41 |  | Hydrophobic |
| Chain M↔Chain R | M | TYR403 | R | LEU52 |  | Hydrophobic |
| Chain M↔Chain R | M | LEU406 | R | PHE56 |  | Hydrophobic |
| Chain M↔Chain R | M | LEU406 | R | LEU52 |  | Hydrophobic |
| Chain M↔Chain R | M | ILE415 | R | VAL41 |  | Hydrophobic |
| Chain M↔Chain R | M | VAL419 | R | VAL41 |  | Hydrophobic |
| Chain M↔Chain R | M | ILE420 | R | VAL41 |  | Hydrophobic |
| Chain M↔Chain R | M | LEU424 | R | VAL33 |  | Hydrophobic |

| **Interface** | **Chain1** | **gp18** | **Chain2** | **gp26** | **Disatnce (Å)** | **Bond type** |
| --- | --- | --- | --- | --- | --- | --- |
| Chain M↔Chain a | M | ASP335 | a | THR127 | 3.38 | Hydrogen bond |
| Chain M↔Chain a | M | GLN339 | a | THR127 | 2.74 | Hydrogen bond |
| Chain M↔Chain a | M | GLY261 | a | LYS135 | 2.86 | Hydrogen bond |
| Chain M↔Chain a | M | ASP265 | a | LYS139 | 5.49 | Electrostatic |
| Chain M↔Chain a | M | PHE263 | a | PHE162 | 5.05 | Hydrophobic (π–π stacking) |
| Chain M↔Chain a | M | TRP342 | a | ILE128 |  | Hydrophobic |
| Chain M↔Chain a | M | TYR16 | a | ARG132 | 5.86 | Cation–π |
| Chain M↔Chain a | M | TYR17 | a | ARG132 | 5.42 | Cation–π |
| Chain M↔Chain a | M | PHE263 | a | LYS139 | 5.30 | Cation–π |
| Chain M↔Chain a | M | PHE263 | a | LYS135 | 5.92 | Cation–π |
| Chain M↔Chain c | M | TRP8 | c | THR111 | 3.40 | Hydrogen bond |
| Chain M↔Chain c | M | TRP8 | c | VAL113 |  | Hydrophobic |
| Chain M↔Chain d | M | ASP305 | d | LYS135 | 5.27 | Electrostatic |
| Chain M↔Chain d | M | ILE304 | d | TYR200 |  | Hydrophobic |

**Supplementary Tables 3c**

**gp18 (BHP) chain M interactions (Intra)**

| **Interface** | **Chain1** | **gp18** | **Chain2** | **gp18** | **Disatnce (Å)** | **Bond type** |
| --- | --- | --- | --- | --- | --- | --- |
| Chain M↔Chain N | M | ASP356 | N | LYS127 | 2.86 | Salt bridge (Electrostatic, Hydrogen bond) |
| Chain M↔Chain N | M | LYS373 | N | ASP115 | 2.85 | Salt bridge (Electrostatic, Hydrogen bond) |
| Chain M↔Chain N | M | TYR448 | N | THR138 | 2.89 | Hydrogen bond |
| Chain M↔Chain N | M | GLU450 | N | ARG182 | 2.83 | Salt bridge (Electrostatic, Hydrogen bond) |
| Chain M↔Chain N | M | SER509 | N | ASP76 | 2.72 | Hydrogen bond |
| Chain M↔Chain N | M | SER509 | N | LYS85 | 2.76 | Hydrogen bond |
| Chain M↔Chain N | M | SER364 | N | THR121 | 2.79 | Hydrogen bond |
| Chain M↔Chain N | M | GLY381 | N | ARG232 | 3.17 | Hydrogen bond |
| Chain M↔Chain N | M | GLY426 | N | ARG232 | 3.21 | Hydrogen bond |
| Chain M↔Chain N | M | THR427 | N | GLN157 | 3.37 | Hydrogen bond |
| Chain M↔Chain N | M | THR427 | N | PHE158 | 3.46 | Hydrogen bond |
| Chain M↔Chain N | M | LEU443 | N | ASN36 | 2.96 | Hydrogen bond |
| Chain M↔Chain N | M | TRP445 | N | ASP208 | 2.93 | Hydrogen bond |
| Chain M↔Chain N | M | TRP445 | N | ASN36 | 3.40 | Hydrogen bond |
| Chain M↔Chain N | M | MET446 | N | ASN36 | 3.10 | Hydrogen bond |
| Chain M↔Chain N | M | HIS447 | N | GLN210 | 3.02 | Hydrogen bond |
| Chain M↔Chain N | M | ASP508 | N | LYS127 | 3.45 | Hydrogen bond (Electrostatic) |
| Chain M↔Chain N | M | PRO510 | N | LYS85 | 2.84 | Hydrogen bond |
| Chain M↔Chain N | M | ARG548 | N | ASP115 | 2.94 | Salt bridge (Electrostatic, Hydrogen bond) |
| Chain M↔Chain N | M | ARG548 | N | LYS116 | 3.30 | Hydrogen bond |
| Chain M↔Chain N | M | MET367 | N | ILE119 | 2.98 | Hydrogen bond (Hydrophobic) |
| Chain M↔Chain N | M | TRP369 | N | TRP117 | 3.04 | Hydrogen bond (Hydrophobic) |
| Chain M↔Chain N | M | ALA429 | N | VAL155 | 3.30 | Hydrogen bond |
| Chain M↔Chain N | M | ALA442 | N | LYS95 | 2.86 | Hydrogen bond |
| Chain M↔Chain N | M | ASP366 | N | LYS120 | 3.87 | Salt bridge (Electrostatic) |
| Chain M↔Chain N | M | MET367 | N | TRP117 |  | Hydrophobic |
| Chain M↔Chain N | M | TRP369 | N | LEU87 |  | Hydrophobic |
| Chain M↔Chain N | M | TRP369 | N | PRO88 |  | Hydrophobic |
| Chain M↔Chain N | M | PRO371 | N | LEU114 |  | Hydrophobic |
| Chain M↔Chain N | M | VAL378 | N | MET233 |  | Hydrophobic |
| Chain M↔Chain N | M | VAL378 | N | LEU144 |  | Hydrophobic |
| Chain M↔Chain N | M | PRO384 | N | LEU574 |  | Hydrophobic |
| Chain M↔Chain N | M | ILE394 | N | ILE394 |  | Hydrophobic |
| Chain M↔Chain N | M | TYR403 | N | TYR403 | 5.69 | Hydrophobic (π–π stacking) |
| Chain M↔Chain N | M | PRO422 | N | ILE389 |  | Hydrophobic |
| Chain M↔Chain N | M | PHE423 | N | ILE389 |  | Hydrophobic |
| Chain M↔Chain N | M | LEU424 | N | PHE158 |  | Hydrophobic |
| Chain M↔Chain N | M | LEU424 | N | PHE156 |  | Hydrophobic |
| Chain M↔Chain N | M | ILE428 | N | PHE156 |  | Hydrophobic |
| Chain M↔Chain N | M | TRP431 | N | MET233 |  | Hydrophobic |
| Chain M↔Chain N | M | TRP431 | N | ILE153 |  | Hydrophobic |
| Chain M↔Chain N | M | TRP445 | N | ALA280 |  | Hydrophobic |
| Chain M↔Chain N | M | TRP445 | N | ALA44 |  | Hydrophobic |
| Chain M↔Chain N | M | MET446 | N | MET98 |  | Hydrophobic |
| Chain M↔Chain N | M | MET446 | N | LEU113 |  | Hydrophobic |
| Chain M↔Chain N | M | MET446 | N | ALA44 |  | Hydrophobic |
| Chain M↔Chain N | M | TYR448 | N | TYR142 |  | Hydrophobic |
| Chain M↔Chain N | M | TYR448 | N | TYR139 | 5.14 | Hydrophobic (π–π stacking) |
| Chain M↔Chain N | M | TYR448 | N | LEU113 |  | Hydrophobic |
| Chain M↔Chain N | M | TRP449 | N | LEU143 |  | Hydrophobic |
| Chain M↔Chain N | M | TRP449 | N | LEU180 |  | Hydrophobic |
| Chain M↔Chain N | M | TRP449 | N | VAL211 |  | Hydrophobic |
| Chain M↔Chain N | M | TRP449 | N | TYR139 | 5.24 | Hydrophobic (π–π stacking) |
| Chain M↔Chain N | M | TRP449 | N | VAL183 |  | Hydrophobic |
| Chain M↔Chain N | M | LEU451 | N | TYR142 |  | Hydrophobic |
| Chain M↔Chain N | M | TYR452 | N | MET233 |  | Hydrophobic |
| Chain M↔Chain N | M | TYR452 | N | LEU144 |  | Hydrophobic |
| Chain M↔Chain N | M | VAL507 | N | ILE119 |  | Hydrophobic |
| Chain M↔Chain N | M | PRO510 | N | LEU82 |  | Hydrophobic |
| Chain M↔Chain N | M | TRP517 | N | TRP117 | 6.42 | Hydrophobic (π–π stacking) |
| Chain M↔Chain N | M | TRP517 | N | PRO88 |  | Hydrophobic |
| Chain M↔Chain N | M | LEU556 | N | LEU556 |  | Hydrophobic |
| Chain M↔Chain N | M | LEU559 | N | LEU564 |  | Hydrophobic |
| Chain M↔Chain N | M | PHE563 | N | PHE563 | 6.43 | Hydrophobic (π–π stacking) |
| Chain M↔Chain N | M | PHE563 | N | ILE567 |  | Hydrophobic |
| Chain M↔Chain N | M | PHE563 | N | LEU564 |  | Hydrophobic |
| Chain M↔Chain N | M | ALA566 | N | ILE567 |  | Hydrophobic |
| Chain M↔Chain N | M | ILE567 | N | ILE567 |  | Hydrophobic |
| Chain M↔Chain N | M | VAL570 | N | VAL570 |  | Hydrophobic |
| Chain M↔Chain N | M | LEU574 | N | VAL575 |  | Hydrophobic |
| Chain M↔Chain N | M | TRP445 | N | HIS42 | 6.77 | π–π stacking |
| Chain M↔Chain N | M | PHE423 | N | LYS391 | 4.10 | Cation–π |
| Chain M↔Chain N | M | TRP431 | N | ARG232 | 4.65 | Cation–π |
| Chain M↔Chain O | M | HIS42 | O | TRP445 | 3.24 | Hydrogen bond (π–π stacking) |
| Chain M↔Chain O | M | ASP76 | O | SER509 | 2.85 | Hydrogen bond |
| Chain M↔Chain O | M | LYS85 | O | SER509 | 2.68 | Hydrogen bond |
| Chain M↔Chain O | M | ASP115 | O | LYS373 | 2.86 | Salt bridge (Electrostatic, Hydrogen bond) |
| Chain M↔Chain O | M | ASN118 | O | SER368 | 3.21 | Hydrogen bond |
| Chain M↔Chain O | M | LYS127 | O | ASP356 | 3.49 | Salt bridge (Electrostatic, Hydrogen bond) |
| Chain M↔Chain O | M | ARG182 | O | GLU450 | 2.85 | Salt bridge (Electrostatic, Hydrogen bond) |
| Chain M↔Chain O | M | GLU395 | O | THR397 | 2.73 | Hydrogen bond |
| Chain M↔Chain O | M | TYR403 | O | TYR403 | 2.99 | Hydrogen bond (Hydrophobic) |
| Chain M↔Chain O | M | ASN36 | O | MET446 | 2.76 | Hydrogen bond |
| Chain M↔Chain O | M | ASN36 | O | LEU443 | 2.95 | Hydrogen bond |
| Chain M↔Chain O | M | ASN36 | O | TRP445 | 3.02 | Hydrogen bond |
| Chain M↔Chain O | M | ASN96 | O | MET446 | 2.76 | Hydrogen bond |
| Chain M↔Chain O | M | ASP115 | O | ARG548 | 2.85 | Salt bridge (Electrostatic, Hydrogen bond) |
| Chain M↔Chain O | M | LYS116 | O | ARG548 | 3.36 | Hydrogen bond |
| Chain M↔Chain O | M | TRP117 | O | SER368 | 3.25 | Hydrogen bond |
| Chain M↔Chain O | M | THR121 | O | SER364 | 2.82 | Hydrogen bond |
| Chain M↔Chain O | M | LYS127 | O | ASP508 | 2.97 | Hydrogen bond (Electrostatic) |
| Chain M↔Chain O | M | PHE158 | O | THR427 | 3.25 | Hydrogen bond |
| Chain M↔Chain O | M | ARG160 | O | VAL425 | 2.80 | Hydrogen bond |
| Chain M↔Chain O | M | ASP208 | O | TRP445 | 2.93 | Hydrogen bond |
| Chain M↔Chain O | M | GLN210 | O | HIS447 | 3.17 | Hydrogen bond |
| Chain M↔Chain O | M | ARG232 | O | GLY381 | 2.88 | Hydrogen bond |
| Chain M↔Chain O | M | ARG232 | O | GLY426 | 3.08 | Hydrogen bond |
| Chain M↔Chain O | M | LYS95 | O | ALA442 | 2.80 | Hydrogen bond |
| Chain M↔Chain O | M | TRP117 | O | TRP369 | 3.28 | Hydrogen bond (Hydrophobic) |
| Chain M↔Chain O | M | ILE119 | O | MET367 | 2.88 | Hydrogen bond (Hydrophobic) |
| Chain M↔Chain O | M | VAL155 | O | ALA429 | 3.29 | Hydrogen bond |
| Chain M↔Chain O | M | LYS120 | O | ASP366 | 3.55 | Salt bridge (Electrostatic) |
| Chain M↔Chain O | M | ALA44 | O | MET446 |  | Hydrophobic |
| Chain M↔Chain O | M | LEU82 | O | PRO510 |  | Hydrophobic |
| Chain M↔Chain O | M | LEU87 | O | TRP369 |  | Hydrophobic |
| Chain M↔Chain O | M | PRO88 | O | TRP517 |  | Hydrophobic |
| Chain M↔Chain O | M | PRO88 | O | TRP369 |  | Hydrophobic |
| Chain M↔Chain O | M | MET98 | O | MET446 |  | Hydrophobic |
| Chain M↔Chain O | M | LEU113 | O | TYR448 |  | Hydrophobic |
| Chain M↔Chain O | M | LEU113 | O | MET446 |  | Hydrophobic |
| Chain M↔Chain O | M | TRP117 | O | TRP517 | 6.47 | Hydrophobic (π–π stacking) |
| Chain M↔Chain O | M | TRP117 | O | MET367 |  | Hydrophobic |
| Chain M↔Chain O | M | ILE119 | O | VAL507 |  | Hydrophobic |
| Chain M↔Chain O | M | TYR139 | O | TYR448 | 5.16 | Hydrophobic (π–π stacking) |
| Chain M↔Chain O | M | TYR139 | O | TRP449 | 6.37 | Hydrophobic (π–π stacking) |
| Chain M↔Chain O | M | TYR142 | O | LEU451 |  | Hydrophobic |
| Chain M↔Chain O | M | TYR142 | O | TYR448 |  | Hydrophobic |
| Chain M↔Chain O | M | LEU143 | O | TRP449 |  | Hydrophobic |
| Chain M↔Chain O | M | LEU144 | O | VAL378 |  | Hydrophobic |
| Chain M↔Chain O | M | LEU144 | O | TYR452 |  | Hydrophobic |
| Chain M↔Chain O | M | ILE153 | O | TRP431 |  | Hydrophobic |
| Chain M↔Chain O | M | PHE156 | O | ILE428 |  | Hydrophobic |
| Chain M↔Chain O | M | PHE156 | O | LEU424 |  | Hydrophobic |
| Chain M↔Chain O | M | PHE158 | O | LEU424 |  | Hydrophobic |
| Chain M↔Chain O | M | LEU180 | O | TRP449 |  | Hydrophobic |
| Chain M↔Chain O | M | VAL183 | O | TRP449 |  | Hydrophobic |
| Chain M↔Chain O | M | VAL211 | O | TRP449 |  | Hydrophobic |
| Chain M↔Chain O | M | MET233 | O | VAL378 |  | Hydrophobic |
| Chain M↔Chain O | M | MET233 | O | TRP431 |  | Hydrophobic |
| Chain M↔Chain O | M | MET233 | O | TYR452 |  | Hydrophobic |
| Chain M↔Chain O | M | ALA280 | O | TRP445 |  | Hydrophobic |
| Chain M↔Chain O | M | ALA388 | O | PRO422 |  | Hydrophobic |
| Chain M↔Chain O | M | ALA388 | O | PHE423 |  | Hydrophobic |
| Chain M↔Chain O | M | ALA390 | O | ILE394 |  | Hydrophobic |
| Chain M↔Chain O | M | ILE394 | O | ILE394 |  | Hydrophobic |
| Chain M↔Chain O | M | LEU556 | O | LEU556 |  | Hydrophobic |
| Chain M↔Chain O | M | PHE563 | O | PHE563 | 6.64 | Hydrophobic (π–π stacking) |
| Chain M↔Chain O | M | LEU564 | O | PHE563 |  | Hydrophobic |
| Chain M↔Chain O | M | ILE567 | O | ALA566 |  | Hydrophobic |
| Chain M↔Chain O | M | ILE567 | O | ILE567 |  | Hydrophobic |
| Chain M↔Chain O | M | ILE567 | O | PHE563 |  | Hydrophobic |
| Chain M↔Chain O | M | VAL570 | O | VAL570 |  | Hydrophobic |
| Chain M↔Chain O | M | LEU574 | O | VAL425 |  | Hydrophobic |
| Chain M↔Chain O | M | VAL575 | O | MET161 |  | Hydrophobic |
| Chain M↔Chain O | M | VAL575 | O | VAL572 |  | Hydrophobic |
| Chain M↔Chain O | M | ARG232 | O | TRP431 | 4.86 | Cation–π |

**Supplementary Tables 3d**

**gp20 (CFP) chain P-gp18 (BHP) inter-complex interactions**

| **Interface** | **Chain1** | **gp18** | **Chain2** | **gp20** | **Disatnce (Å)** | **Bond type** |
| --- | --- | --- | --- | --- | --- | --- |
| Chain M↔Chain P | M | ASP192 | P | THR23 | 2.93 | Hydrogen bond |
| Chain M↔Chain P | M | ASN148 | P | LEU25 | 3.39 | Hydrogen bond |
| Chain M↔Chain P | M | THR227 | P | ALA2 | 2.80 | Hydrogen bond |
| Chain M↔Chain P | M | ASP246 | P | ALA2 | 3.13 | Hydrogen bond |
| Chain M↔Chain P | M | ASP246 | P | GLY3 | 3.22 | Hydrogen bond |
| Chain M↔Chain P | M | SER467 | P | GLY3 | 3.24 | Hydrogen bond |
| Chain M↔Chain P | M | MET163 | P | ILE18 | 2.88 | Hydrogen bond |
| Chain M↔Chain P | M | ALA165 | P | ILE18 | 2.92 | Hydrogen bond |
| Chain M↔Chain P | M | ASP192 | P | VAL22 | 3.34 | Hydrogen bond |
| Chain M↔Chain P | M | TRP226 | P | LEU4 | 2.88 | Hydrogen bond (Hydrophobic) |
| Chain M↔Chain P | M | ASP242 | P | ALA2 | 3.46 | Hydrogen bond |
| Chain M↔Chain P | M | LEU463 | P | ASP12 | 3.24 | Hydrogen bond |
| Chain M↔Chain P | M | PRO149 | P | LEU25 |  | Hydrophobic |
| Chain M↔Chain P | M | PHE150 | P | ALA26 |  | Hydrophobic |
| Chain M↔Chain P | M | PHE150 | P | LEU25 |  | Hydrophobic |
| Chain M↔Chain P | M | PHE156 | P | VAL33 |  | Hydrophobic |
| Chain M↔Chain P | M | PHE158 | P | VAL33 |  | Hydrophobic |
| Chain M↔Chain P | M | PHE158 | P | TYR16 | 5.19 | Hydrophobic (π–π stacking) |
| Chain M↔Chain P | M | PHE162 | P | ILE18 |  | Hydrophobic |
| Chain M↔Chain P | M | PHE162 | P | LEU25 |  | Hydrophobic |
| Chain M↔Chain P | M | MET163 | P | TYR16 |  | Hydrophobic |
| Chain M↔Chain P | M | MET163 | P | VAL17 |  | Hydrophobic |
| Chain M↔Chain P | M | LEU164 | P | ILE18 |  | Hydrophobic |
| Chain M↔Chain P | M | ALA165 | P | LEU11 |  | Hydrophobic |
| Chain M↔Chain P | M | ALA165 | P | VAL17 |  | Hydrophobic |
| Chain M↔Chain P | M | MET174 | P | VAL22 |  | Hydrophobic |
| Chain M↔Chain P | M | LEU178 | P | VAL22 |  | Hydrophobic |
| Chain M↔Chain P | M | LEU178 | P | LEU25 |  | Hydrophobic |
| Chain M↔Chain P | M | LEU190 | P | VAL22 |  | Hydrophobic |
| Chain M↔Chain P | M | PRO194 | P | VAL22 |  | Hydrophobic |
| Chain M↔Chain P | M | PHE228 | P | LEU11 |  | Hydrophobic |
| Chain M↔Chain P | M | PHE228 | P | VAL17 |  | Hydrophobic |
| Chain M↔Chain P | M | PHE228 | P | LEU4 |  | Hydrophobic |
| Chain M↔Chain P | M | TYR314 | P | PRO5 |  | Hydrophobic |
| Chain M↔Chain P | M | PHE318 | P | PRO5 |  | Hydrophobic |
| Chain M↔Chain P | M | ALA399 | P | LEU48 |  | Hydrophobic |
| Chain M↔Chain P | M | TYR403 | P | ALA51 |  | Hydrophobic |
| Chain M↔Chain P | M | PHE404 | P | ALA51 |  | Hydrophobic |
| Chain M↔Chain P | M | PHE404 | P | TYR54 | 6.56 | Hydrophobic (π–π stacking) |
| Chain M↔Chain P | M | PHE404 | P | PRO50 |  | Hydrophobic |
| Chain M↔Chain P | M | LEU406 | P | ILE59 |  | Hydrophobic |
| Chain M↔Chain P | M | LEU406 | P | TYR54 |  | Hydrophobic |
| Chain M↔Chain P | M | ALA407 | P | TYR54 |  | Hydrophobic |
| Chain M↔Chain P | M | ALA464 | P | LEU11 |  | Hydrophobic |
| Chain M↔Chain P | M | ALA464 | P | LEU4 |  | Hydrophobic |
| Chain M↔Chain P | M | LEU466 | P | LEU4 |  | Hydrophobic |
| Chain M↔Chain P | M | LEU466 | P | PRO5 |  | Hydrophobic |
| Chain O↔Chain P | O | ILE415 | P | ARG38 | 2.74 | Hydrogen bond |
| Chain O↔Chain P | O | TYR403 | P | LEU52 |  | Hydrophobic |
| Chain O↔Chain P | O | TYR403 | P | LEU48 |  | Hydrophobic |
| Chain O↔Chain P | O | LEU406 | P | LEU52 |  | Hydrophobic |
| Chain O↔Chain P | O | LEU406 | P | PHE56 |  | Hydrophobic |
| Chain O↔Chain P | O | ILE415 | P | VAL41 |  | Hydrophobic |
| Chain O↔Chain P | O | LEU424 | P | VAL33 |  | Hydrophobic |

**Supplementary Tables 3d**

**gp20 (CFP) chain P interactions (Intra)**

| **Interface** | **Chain1** | **gp20** | **Chain2** | **gp20** | **Disatnce (Å)** | **Bond type** |
| --- | --- | --- | --- | --- | --- | --- |
| Chain P↔Chain Q | P | LEU66 | Q | ILE59 | 3.02 | Hydrogen bond |
| Chain P↔Chain Q | P | PHE55 | Q | PHE55 |  | Hydrophobic |
| Chain P↔Chain Q | P | MET60 | Q | ILE59 |  | Hydrophobic |
| Chain P↔Chain Q | P | MET60 | Q | PHE55 |  | Hydrophobic |
| Chain P↔Chain Q | P | LEU66 | Q | LEU66 |  | Hydrophobic |
| Chain P↔Chain Q | P | LEU66 | Q | PHE63 |  | Hydrophobic |
| Chain P↔Chain Q | P | LEU66 | Q | LEU69 |  | Hydrophobic |
| Chain P↔Chain Q | P | LEU66 | Q | MET60 |  | Hydrophobic |
| Chain P↔Chain Q | P | LEU69 | Q | LEU69 |  | Hydrophobic |
| Chain P↔Chain Q | P | LEU70 | Q | LEU69 |  | Hydrophobic |
| Chain P↔Chain R | P | ILE59 | R | LEU66 | 2.85 | Hydrogen bond |
| Chain P↔Chain R | P | PHE55 | R | PHE55 |  | Hydrophobic |
| Chain P↔Chain R | P | ILE59 | R | MET60 |  | Hydrophobic |
| Chain P↔Chain R | P | MET60 | R | MET60 |  | Hydrophobic |
| Chain P↔Chain R | P | MET60 | R | LEU66 |  | Hydrophobic |
| Chain P↔Chain R | P | PHE63 | R | LEU66 |  | Hydrophobic |
| Chain P↔Chain R | P | LEU66 | R | LEU66 |  | Hydrophobic |
| Chain P↔Chain R | P | LEU69 | R | LEU69 |  | Hydrophobic |
| Chain P↔Chain R | P | LEU69 | R | LEU66 |  | Hydrophobic |
| Chain Q↔Chain R | Q | THR65 | R | ILE59 | 2.96 | Hydrogen bond |
| Chain Q↔Chain R | Q | LEU66 | R | ILE59 | 2.84 | Hydrogen bond |
| Chain Q↔Chain R | Q | PHE55 | R | PHE55 |  | Hydrophobic |
| Chain Q↔Chain R | Q | MET60 | R | ILE59 |  | Hydrophobic |
| Chain Q↔Chain R | Q | LEU66 | R | PHE63 |  | Hydrophobic |
| Chain Q↔Chain R | Q | LEU66 | R | LEU66 |  | Hydrophobic |
| Chain Q↔Chain R | Q | LEU69 | R | LEU69 |  | Hydrophobic |
| Chain Q↔Chain R | Q | LEU70 | R | PHE63 |  | Hydrophobic |
| Chain Q↔Chain R | Q | LEU70 | R | LEU69 |  | Hydrophobic |

**Supplementary Tables 3e**

**gp26 (BppU) chain S- gp17 (DTP)/gp18 (BHP) inter-complex interactions**

| **Interface** | **Chain1** | **gp17** | **Chain2** | **gp26** | **Disatnce (Å)** | **Bond type** |
| --- | --- | --- | --- | --- | --- | --- |
| Chain G↔Chain S | G | ASP207 | S | TYR200 | 2.92 | Hydrogen bond |
| Chain G↔Chain S | G | MET206 | S | TYR288 | 2.87 | Hydrogen bond |
| Chain G↔Chain S | G | GLY209 | S | TYR288 | 3.16 | Hydrogen bond |
| Chain G↔Chain S | G | THR211 | S | ASN201 | 3.04 | Hydrogen bond |
| Chain G↔Chain S | G | ARG301 | S | ASP107 | 4.63 | Electrostatic |
| Chain G↔Chain S | G | MET206 | S | PHE170 |  | Hydrophobic |
| Chain G↔Chain S | G | PRO264 | S | PHE286 |  | Hydrophobic |
| Chain G↔Chain S | G | ARG164 | S | PHE286 | 4.99 | Cation–π |
| Chain L↔Chain S | L | ASP13 | S | ARG104 | 3.04 | Hydrogen bond |
| Chain L↔Chain S | L | GLY14 | S | ARG104 | 3.32 | Hydrogen bond |
| Chain L↔Chain S | L | ARG26 | S | ARG101 | 3.35 | Hydrogen bond |
| Chain L↔Chain S | L | GLU27 | S | ARG101 | 5.96 | Electrostatic |

| **Interface** | **Chain1** | **gp18** | **Chain2** | **gp26** | **Disatnce (Å)** | **Bond type** |
| --- | --- | --- | --- | --- | --- | --- |
| Chain N↔Chain S | N | ASP265 | S | LYS139 | 3.48 | Salt bridge (Electrostatic, Hydrogen bond) |
| Chain N↔Chain S | N | GLN339 | S | THR127 | 2.84 | Hydrogen bond |
| Chain N↔Chain S | N | GLY261 | S | LYS135 | 2.96 | Hydrogen bond |
| Chain N↔Chain S | N | GLY273 | S | PHE161 | 3.41 | Hydrogen bond |
| Chain N↔Chain S | N | PHE263 | S | PHE162 | 5.18 | Hydrophobic (π–π stacking) |
| Chain N↔Chain S | N | TRP342 | S | ILE128 |  | Hydrophobic |
| Chain N↔Chain S | N | TYR16 | S | ARG132 | 5.28 | Cation–π |
| Chain N↔Chain S | N | PHE263 | S | LYS135 | 4.64 | Cation–π |
| Chain N↔Chain S | N | PHE263 | S | LYS139 | 5.42 | Cation–π |

**Supplementary Tables 3e**

**gp26 (BppU) chain S interactions (Intra)**

| **Interface** | **Chain1** | **gp26** | **Chain2** | **gp26** | **Disatnce (Å)** | **Bond type** |
| --- | --- | --- | --- | --- | --- | --- |
| Chain S↔Chain T | S | ASN253 | T | ASN265 | 3.22 | Hydrogen bond |
| Chain S↔Chain T | S | ASN253 | T | ASN181 | 3.31 | Hydrogen bond |
| Chain S↔Chain T | S | HIS3 | T | LYS19 | 2.87 | Hydrogen bond |
| Chain S↔Chain T | S | ALA5 | T | ARG101 | 2.83 | Hydrogen bond |
| Chain S↔Chain T | S | GLU79 | T | VAL103 | 3.47 | Hydrogen bond |
| Chain S↔Chain T | S | THR267 | T | THR267 | 3.34 | Hydrogen bond |
| Chain S↔Chain T | S | ILE313 | T | LYS251 | 3.07 | Hydrogen bond |
| Chain S↔Chain T | S | PRO90 | T | GLY17 | 2.88 | Hydrogen bond |
| Chain S↔Chain T | S | ASP115 | T | LEU119 | 2.99 | Hydrogen bond |
| Chain S↔Chain T | S | ALA117 | T | ALA117 | 3.28 | Hydrogen bond (Hydrophobic) |
| Chain S↔Chain T | S | GLU79 | T | ARG14 | 3.83 | Salt bridge (Electrostatic) |
| Chain S↔Chain T | S | GLU4 | T | ARG101 | 5.85 | Electrostatic |
| Chain S↔Chain T | S | GLU278 | T | LYS152 | 4.26 | Electrostatic |
| Chain S↔Chain T | S | TYR41 | T | PHE105 | 5.11 | Hydrophobic (π–π stacking) |
| Chain S↔Chain T | S | TYR41 | T | VAL103 |  | Hydrophobic |
| Chain S↔Chain T | S | VAL89 | T | PRO66 |  | Hydrophobic |
| Chain S↔Chain T | S | PRO109 | T | TYR120 |  | Hydrophobic |
| Chain S↔Chain T | S | PRO109 | T | ALA171 |  | Hydrophobic |
| Chain S↔Chain T | S | PRO109 | T | PHE170 |  | Hydrophobic |
| Chain S↔Chain T | S | ALA110 | T | LEU118 |  | Hydrophobic |
| Chain S↔Chain T | S | LEU175 | T | LEU119 |  | Hydrophobic |
| Chain S↔Chain T | S | LEU175 | T | ALA121 |  | Hydrophobic |
| Chain S↔Chain T | S | LEU175 | T | TRP308 |  | Hydrophobic |
| Chain S↔Chain T | S | ILE313 | T | LEU249 |  | Hydrophobic |
| Chain S↔Chain b | S | ARG14 | b | TYR41 | 3.22 | Hydrogen bond |
| Chain S↔Chain b | S | ARG14 | b | GLU79 | 3.36 | Salt bridge (Electrostatic, Hydrogen bond) |
| Chain S↔Chain b | S | ARG101 | b | GLU4 | 2.73 | Salt bridge (Electrostatic, Hydrogen bond) |
| Chain S↔Chain b | S | ARG101 | b | TYR95 | 2.77 | Hydrogen bond (Cation–π) |
| Chain S↔Chain b | S | SER16 | b | MET92 | 2.89 | Hydrogen bond |
| Chain S↔Chain b | S | LYS19 | b | HIS3 | 3.33 | Hydrogen bond |
| Chain S↔Chain b | S | ARG101 | b | ALA5 | 2.99 | Hydrogen bond |
| Chain S↔Chain b | S | VAL103 | b | GLU79 | 3.40 | Hydrogen bond |
| Chain S↔Chain b | S | GLY17 | b | PRO90 | 2.92 | Hydrogen bond |
| Chain S↔Chain b | S | ASP107 | b | SER43 | 3.16 | Hydrogen bond |
| Chain S↔Chain b | S | PRO66 | b | VAL89 |  | Hydrophobic |
| Chain S↔Chain b | S | VAL103 | b | TYR41 |  | Hydrophobic |
| Chain S↔Chain b | S | PHE105 | b | TYR41 |  | Hydrophobic |
