# Supplementary material for: Cryo-EM reveals a conserved baseplate architecture and distinct accessory protein assemblies in mycobacteriophages Claus, Corndog and Mysterious
Source: Research Square preprint supplement (doi:10.21203/rs.3.rs-9616548/v1), 2026-06-05
Supplement: Supplementary file 2 [file aaea05df7f9d2ba8a191fee9.docx]

**Cryo-EM reveals unique baseplate architectures underlying host adaptation in mycobacteriophages *Claus*, *Corndog* and *Mysterious***

Sunil Kumar Tewary1,Chun-Hsiung Wang1, Ming-Ching Lin1,2, Melvin C. Shen1, Li-An Tsai1, 2, Yel1, Todd L. Lowary1,2 and Meng-Chiao Ho1,2

1Institute of Biological Chemistry, Academia Sinica; 2Institute of Biochemical Sciences, National Taiwan University

**Supplementary Tables**

**Supplementary Table 4 - Corndog inter and Intra subunit interactions**

**Supplementary Tables 4a**

**gp49 (TTP) chain A /gp58 (DTP) inter complex interaction**

| **Interface** | **Chain1** | **gp49** | **Chain2** | **gp58** | **Disatnce (Å)** | **Bond type** |
| --- | --- | --- | --- | --- | --- | --- |
| Chain A↔Chain G | A | GLN112 | G | LYS73 | 3.06 | Hydrogen bond |
| Chain A↔Chain G | A | ASP122 | G | ARG114 | 2.74 | Salt bridge (Electrostatic, Hydrogen bond) |
| Chain A↔Chain G | A | ASP124 | G | ARG114 | 2.74 | Salt bridge (Electrostatic, Hydrogen bond) |
| Chain A↔Chain G | A | GLN116 | G | GLY56 | 3.01 | Hydrogen bond |
| Chain A↔Chain G | A | PHE121 | G | LYS63 | 2.82 | Hydrogen bond |
| Chain A↔Chain G | A | LEU115 | G | LEU72 | 2.75 | Hydrogen bond (Hydrophobic) |
| Chain A↔Chain G | A | LEU115 | G | LEU75 |  | Hydrophobic |
| Chain A↔Chain G | A | PHE121 | G | PRO61 |  | Hydrophobic |
| Chain A↔Chain G | A | PHE121 | G | ARG114 | 5.60 | Cation–π |
| Chain A↔Chain H | A | PRO233 | H | LYS63 | 2.84 | Hydrogen bond |
| Chain A↔Chain H | A | ASP234 | H | HIS28 | 3.17 | Hydrogen bond |
| Chain A↔Chain H | A | PHE237 | H | HIS28 | 2.91 | Hydrogen bond |
| Chain A↔Chain H | A | GLU179 | H | LYS116 | 4.95 | Electrostatic |
| Chain A↔Chain H | A | GLU182 | H | LYS116 | 4.47 | Electrostatic |
| Chain A↔Chain H | A | LEU206 | H | VAL64 |  | Hydrophobic |
| Chain A↔Chain H | A | PRO235 | H | VAL60 |  | Hydrophobic |
| Chain A↔Chain H | A | TYR236 | H | PRO27 |  | Hydrophobic |
| Chain A↔Chain H | A | VAL238 | H | PRO27 |  | Hydrophobic |
| Chain A↔Chain H | A | ILE251 | H | TYR31 |  | Hydrophobic |
| Chain A↔Chain H | A | PRO252 | H | TYR31 |  | Hydrophobic |
| Chain A↔Chain H | A | PRO252 | H | PHE32 |  | Hydrophobic |

**Supplementary Tables 4a**

**gp49 (TTP) chain A interactions (Intra)**

| **Interface** | **Chain1** | **gp49** | **Chain2** | **gp49** | **Disatnce (Å)** | **Bond type** |
| --- | --- | --- | --- | --- | --- | --- |
| Chain A↔Chain B | A | LYS145 | B | GLU257 | 3.07 | Salt bridge (Electrostatic, Hydrogen bond) |
| Chain A↔Chain B | A | ARG148 | B | GLU257 | 2.76 | Salt bridge (Electrostatic, Hydrogen bond) |
| Chain A↔Chain B | A | ASP164 | B | LYS268 | 3.27 | Salt bridge (Electrostatic, Hydrogen bond) |
| Chain A↔Chain B | A | LYS208 | B | ASP124 | 3.24 | Salt bridge (Electrostatic, Hydrogen bond) |
| Chain A↔Chain B | A | ARG216 | B | GLU102 | 3.19 | Salt bridge (Electrostatic, Hydrogen bond) |
| Chain A↔Chain B | A | ARG217 | B | ASN24 | 3.28 | Hydrogen bond |
| Chain A↔Chain B | A | LYS219 | B | GLU97 | 3.14 | Salt bridge (Electrostatic, Hydrogen bond) |
| Chain A↔Chain B | A | ASP223 | B | ARG103 | 2.86 | Salt bridge (Electrostatic, Hydrogen bond) |
| Chain A↔Chain B | A | ASP62 | B | THR6 | 3.35 | Hydrogen bond |
| Chain A↔Chain B | A | GLY77 | B | ARG21 | 3.20 | Hydrogen bond |
| Chain A↔Chain B | A | TRP79 | B | SER271 | 2.91 | Hydrogen bond |
| Chain A↔Chain B | A | VAL80 | B | SER271 | 3.44 | Hydrogen bond |
| Chain A↔Chain B | A | GLU87 | B | MET1 | 3.48 | Hydrogen bond |
| Chain A↔Chain B | A | SER127 | B | ASN118 | 3.42 | Hydrogen bond |
| Chain A↔Chain B | A | GLU138 | B | ASP19 | 2.93 | Hydrogen bond |
| Chain A↔Chain B | A | ARG146 | B | PRO242 | 2.93 | Hydrogen bond |
| Chain A↔Chain B | A | ALA152 | B | ASN243 | 2.90 | Hydrogen bond |
| Chain A↔Chain B | A | THR167 | B | TRP264 | 2.86 | Hydrogen bond |
| Chain A↔Chain B | A | ILE172 | B | HIS256 | 3.41 | Hydrogen bond |
| Chain A↔Chain B | A | LYS208 | B | SER123 | 2.88 | Hydrogen bond |
| Chain A↔Chain B | A | ARG216 | B | ASP98 | 3.19 | Hydrogen bond |
| Chain A↔Chain B | A | ARG216 | B | GLY100 | 3.26 | Hydrogen bond |
| Chain A↔Chain B | A | ARG216 | B | GLY99 | 3.39 | Hydrogen bond |
| Chain A↔Chain B | A | ARG216 | B | ASN133 | 3.47 | Hydrogen bond |
| Chain A↔Chain B | A | ARG217 | B | GLY26 | 3.24 | Hydrogen bond |
| Chain A↔Chain B | A | ARG217 | B | ALA190 | 3.37 | Hydrogen bond |
| Chain A↔Chain B | A | THR220 | B | ARG25 | 2.92 | Hydrogen bond |
| Chain A↔Chain B | A | ASP62 | B | GLY7 | 2.87 | Hydrogen bond |
| Chain A↔Chain B | A | ASP62 | B | SER5 | 3.48 | Hydrogen bond |
| Chain A↔Chain B | A | GLY63 | B | THR8 | 2.86 | Hydrogen bond |
| Chain A↔Chain B | A | GLY63 | B | GLY7 | 3.46 | Hydrogen bond |
| Chain A↔Chain B | A | PRO65 | B | THR8 | 2.83 | Hydrogen bond |
| Chain A↔Chain B | A | GLU128 | B | ASN118 | 3.11 | Hydrogen bond |
| Chain A↔Chain B | A | VAL140 | B | PHE22 | 3.27 | Hydrogen bond (Hydrophobic) |
| Chain A↔Chain B | A | PHE170 | B | VAL259 | 3.12 | Hydrogen bond (Hydrophobic) |
| Chain A↔Chain B | A | ILE172 | B | GLU257 | 2.99 | Hydrogen bond |
| Chain A↔Chain B | A | LYS174 | B | TYR254 | 2.72 | Hydrogen bond |
| Chain A↔Chain B | A | LYS174 | B | TYR255 | 2.89 | Hydrogen bond |
| Chain A↔Chain B | A | VAL176 | B | PRO252 | 3.44 | Hydrogen bond (Hydrophobic) |
| Chain A↔Chain B | A | PHE215 | B | ARG103 | 3.08 | Hydrogen bond (Cation–π) |
| Chain A↔Chain B | A | ARG217 | B | PRO101 | 3.11 | Hydrogen bond |
| Chain A↔Chain B | A | SER218 | B | GLY26 | 3.20 | Hydrogen bond |
| Chain A↔Chain B | A | ASP223 | B | ASN24 | 2.90 | Hydrogen bond |
| Chain A↔Chain B | A | LYS174 | B | GLU128 | 4.97 | Electrostatic |
| Chain A↔Chain B | A | LEU28 | B | TRP10 |  | Hydrophobic |
| Chain A↔Chain B | A | ALA30 | B | TRP10 |  | Hydrophobic |
| Chain A↔Chain B | A | ALA30 | B | PHE15 |  | Hydrophobic |
| Chain A↔Chain B | A | PRO65 | B | PHE15 |  | Hydrophobic |
| Chain A↔Chain B | A | LEU69 | B | PHE15 |  | Hydrophobic |
| Chain A↔Chain B | A | PHE70 | B | PHE15 |  | Hydrophobic |
| Chain A↔Chain B | A | TRP79 | B | PHE22 |  | Hydrophobic |
| Chain A↔Chain B | A | ALA94 | B | VAL18 |  | Hydrophobic |
| Chain A↔Chain B | A | VAL140 | B | LEU198 |  | Hydrophobic |
| Chain A↔Chain B | A | VAL140 | B | VAL259 |  | Hydrophobic |
| Chain A↔Chain B | A | VAL140 | B | TRP264 |  | Hydrophobic |
| Chain A↔Chain B | A | PRO142 | B | TRP264 |  | Hydrophobic |
| Chain A↔Chain B | A | MET149 | B | TYR255 |  | Hydrophobic |
| Chain A↔Chain B | A | LEU151 | B | PRO242 |  | Hydrophobic |
| Chain A↔Chain B | A | ILE161 | B | PRO245 |  | Hydrophobic |
| Chain A↔Chain B | A | PRO165 | B | PHE22 |  | Hydrophobic |
| Chain A↔Chain B | A | PRO165 | B | ILE267 |  | Hydrophobic |
| Chain A↔Chain B | A | PHE170 | B | TRP264 |  | Hydrophobic |
| Chain A↔Chain B | A | ILE172 | B | PRO242 |  | Hydrophobic |
| Chain A↔Chain B | A | PRO175 | B | PRO242 |  | Hydrophobic |
| Chain A↔Chain B | A | PRO175 | B | ILE251 |  | Hydrophobic |
| Chain A↔Chain B | A | VAL176 | B | PRO233 |  | Hydrophobic |
| Chain A↔Chain B | A | VAL176 | B | TYR254 |  | Hydrophobic |
| Chain A↔Chain B | A | MET188 | B | TRP10 |  | Hydrophobic |
| Chain A↔Chain B | A | MET188 | B | PHE15 |  | Hydrophobic |
| Chain A↔Chain B | A | ALA190 | B | TRP10 |  | Hydrophobic |
| Chain A↔Chain B | A | PHE197 | B | TRP10 |  | Hydrophobic |
| Chain A↔Chain B | A | TYR199 | B | TRP10 | 6.22 | Hydrophobic (π–π stacking) |
| Chain A↔Chain B | A | LEU209 | B | LEU125 |  | Hydrophobic |
| Chain A↔Chain B | A | ILE212 | B | ILE107 |  | Hydrophobic |
| Chain A↔Chain B | A | ILE212 | B | PRO105 |  | Hydrophobic |
| Chain A↔Chain B | A | ALA214 | B | ALA104 |  | Hydrophobic |
| Chain A↔Chain B | A | LEU232 | B | PRO120 |  | Hydrophobic |
| Chain A↔Chain B | A | PRO233 | B | MET119 |  | Hydrophobic |
| Chain A↔Chain B | A | TYR254 | B | MET119 |  | Hydrophobic |
| Chain A↔Chain F | A | ASP19 | F | TRP79 | 3.06 | Hydrogen bond |
| Chain A↔Chain F | A | ASN24 | F | ARG217 | 3.18 | Hydrogen bond |
| Chain A↔Chain F | A | ARG54 | F | ASN169 | 3.47 | Hydrogen bond |
| Chain A↔Chain F | A | GLU97 | F | LYS219 | 3.09 | Salt bridge (Electrostatic, Hydrogen bond) |
| Chain A↔Chain F | A | ARG103 | F | ASP223 | 2.88 | Salt bridge (Electrostatic, Hydrogen bond) |
| Chain A↔Chain F | A | ASP124 | F | LYS208 | 2.91 | Salt bridge (Electrostatic, Hydrogen bond) |
| Chain A↔Chain F | A | GLU257 | F | ARG148 | 2.92 | Salt bridge (Electrostatic, Hydrogen bond) |
| Chain A↔Chain F | A | SER271 | F | ASP78 | 2.80 | Hydrogen bond |
| Chain A↔Chain F | A | SER271 | F | ASP164 | 3.34 | Hydrogen bond |
| Chain A↔Chain F | A | GLY7 | F | ASP62 | 2.86 | Hydrogen bond |
| Chain A↔Chain F | A | ASP19 | F | GLU138 | 3.02 | Hydrogen bond |
| Chain A↔Chain F | A | ARG21 | F | GLY77 | 3.08 | Hydrogen bond |
| Chain A↔Chain F | A | ARG25 | F | THR220 | 2.94 | Hydrogen bond |
| Chain A↔Chain F | A | GLY26 | F | ARG217 | 3.10 | Hydrogen bond |
| Chain A↔Chain F | A | GLY100 | F | ARG216 | 2.90 | Hydrogen bond |
| Chain A↔Chain F | A | SER123 | F | LYS208 | 3.02 | Hydrogen bond |
| Chain A↔Chain F | A | ASN133 | F | ARG216 | 3.35 | Hydrogen bond |
| Chain A↔Chain F | A | ALA190 | F | ARG217 | 3.34 | Hydrogen bond |
| Chain A↔Chain F | A | PRO242 | F | ARG146 | 2.81 | Hydrogen bond |
| Chain A↔Chain F | A | ASN243 | F | ALA152 | 2.97 | Hydrogen bond |
| Chain A↔Chain F | A | HIS256 | F | ILE172 | 3.45 | Hydrogen bond |
| Chain A↔Chain F | A | TRP264 | F | THR167 | 2.89 | Hydrogen bond |
| Chain A↔Chain F | A | ASP270 | F | ASP78 | 3.09 | Hydrogen bond |
| Chain A↔Chain F | A | SER271 | F | TRP79 | 3.30 | Hydrogen bond |
| Chain A↔Chain F | A | PRO4 | F | GLU61 | 3.05 | Hydrogen bond |
| Chain A↔Chain F | A | THR8 | F | PRO65 | 2.87 | Hydrogen bond |
| Chain A↔Chain F | A | PHE22 | F | VAL140 | 3.24 | Hydrogen bond (Hydrophobic) |
| Chain A↔Chain F | A | ASN24 | F | ASP223 | 3.05 | Hydrogen bond |
| Chain A↔Chain F | A | GLY26 | F | SER218 | 3.28 | Hydrogen bond |
| Chain A↔Chain F | A | PRO101 | F | ARG217 | 3.12 | Hydrogen bond |
| Chain A↔Chain F | A | ARG103 | F | PHE215 | 2.97 | Hydrogen bond (Cation–π) |
| Chain A↔Chain F | A | ASN118 | F | GLU128 | 3.38 | Hydrogen bond |
| Chain A↔Chain F | A | PRO252 | F | VAL176 | 3.40 | Hydrogen bond (Hydrophobic) |
| Chain A↔Chain F | A | TYR254 | F | LYS174 | 2.73 | Hydrogen bond |
| Chain A↔Chain F | A | TYR255 | F | LYS174 | 2.94 | Hydrogen bond |
| Chain A↔Chain F | A | GLU257 | F | ILE172 | 2.88 | Hydrogen bond |
| Chain A↔Chain F | A | VAL259 | F | PHE170 | 3.11 | Hydrogen bond (Hydrophobic) |
| Chain A↔Chain F | A | GLU102 | F | ARG216 | 3.98 | Salt bridge (Electrostatic) |
| Chain A↔Chain F | A | GLU128 | F | LYS174 | 3.67 | Salt bridge (Electrostatic) |
| Chain A↔Chain F | A | GLU257 | F | LYS145 | 3.50 | Salt bridge (Electrostatic) |
| Chain A↔Chain F | A | LYS268 | F | ASP164 | 3.95 | Salt bridge (Electrostatic) |
| Chain A↔Chain F | A | MET1 | F | TRP56 |  | Hydrophobic |
| Chain A↔Chain F | A | PRO4 | F | ALA60 |  | Hydrophobic |
| Chain A↔Chain F | A | TRP10 | F | TYR199 | 6.61 | Hydrophobic (π–π stacking) |
| Chain A↔Chain F | A | TRP10 | F | ALA190 |  | Hydrophobic |
| Chain A↔Chain F | A | TRP10 | F | PHE197 |  | Hydrophobic |
| Chain A↔Chain F | A | TRP10 | F | ALA30 |  | Hydrophobic |
| Chain A↔Chain F | A | TRP10 | F | MET188 |  | Hydrophobic |
| Chain A↔Chain F | A | TRP10 | F | LEU28 |  | Hydrophobic |
| Chain A↔Chain F | A | PHE15 | F | PRO65 |  | Hydrophobic |
| Chain A↔Chain F | A | PHE15 | F | LEU69 |  | Hydrophobic |
| Chain A↔Chain F | A | PHE15 | F | LEU32 |  | Hydrophobic |
| Chain A↔Chain F | A | PHE15 | F | ALA30 |  | Hydrophobic |
| Chain A↔Chain F | A | PHE15 | F | MET188 |  | Hydrophobic |
| Chain A↔Chain F | A | PHE15 | F | PHE70 |  | Hydrophobic |
| Chain A↔Chain F | A | VAL18 | F | ALA94 |  | Hydrophobic |
| Chain A↔Chain F | A | PHE22 | F | TRP79 |  | Hydrophobic |
| Chain A↔Chain F | A | PHE22 | F | PRO165 |  | Hydrophobic |
| Chain A↔Chain F | A | ALA104 | F | ALA214 |  | Hydrophobic |
| Chain A↔Chain F | A | PRO105 | F | ILE212 |  | Hydrophobic |
| Chain A↔Chain F | A | PRO105 | F | ALA214 |  | Hydrophobic |
| Chain A↔Chain F | A | ILE107 | F | ILE212 |  | Hydrophobic |
| Chain A↔Chain F | A | MET119 | F | PRO233 |  | Hydrophobic |
| Chain A↔Chain F | A | MET119 | F | TYR254 |  | Hydrophobic |
| Chain A↔Chain F | A | PRO120 | F | LEU232 |  | Hydrophobic |
| Chain A↔Chain F | A | PRO120 | F | MET230 |  | Hydrophobic |
| Chain A↔Chain F | A | LEU198 | F | VAL140 |  | Hydrophobic |
| Chain A↔Chain F | A | PRO233 | F | VAL176 |  | Hydrophobic |
| Chain A↔Chain F | A | PRO242 | F | LEU151 |  | Hydrophobic |
| Chain A↔Chain F | A | PRO242 | F | PRO175 |  | Hydrophobic |
| Chain A↔Chain F | A | PRO242 | F | ILE172 |  | Hydrophobic |
| Chain A↔Chain F | A | PRO245 | F | ILE161 |  | Hydrophobic |
| Chain A↔Chain F | A | ILE251 | F | PRO175 |  | Hydrophobic |
| Chain A↔Chain F | A | TYR255 | F | MET149 |  | Hydrophobic |
| Chain A↔Chain F | A | VAL259 | F | VAL140 |  | Hydrophobic |
| Chain A↔Chain F | A | TRP264 | F | PRO165 |  | Hydrophobic |
| Chain A↔Chain F | A | TRP264 | F | PRO142 |  | Hydrophobic |
| Chain A↔Chain F | A | TRP264 | F | PHE170 |  | Hydrophobic |
| Chain A↔Chain F | A | TRP264 | F | VAL140 |  | Hydrophobic |
| Chain A↔Chain F | A | ILE267 | F | PRO165 |  | Hydrophobic |
| Chain A↔Chain F | A | TYR255 | F | ARG148 | 5.38 | Cation–π |

**Supplementary Tables 4b**

**gp58 (DTP) chain G /gp49 (TTP)/gp59 (DTP)/gp60 (BppU) inter complex interactions**

| **Interface** | **Chain1** | **gp49** | **Chain2** | **gp58** | **Disatnce (Å)** | **Bond type** |
| --- | --- | --- | --- | --- | --- | --- |
| Chain A↔Chain G | A | GLN112 | G | LYS73 | 3.06 | Hydrogen bond |
| Chain A↔Chain G | A | ASP122 | G | ARG114 | 2.74 | Salt bridge (Electrostatic, Hydrogen bond) |
| Chain A↔Chain G | A | ASP124 | G | ARG114 | 2.74 | Salt bridge (Electrostatic, Hydrogen bond) |
| Chain A↔Chain G | A | GLN116 | G | GLY56 | 3.01 | Hydrogen bond |
| Chain A↔Chain G | A | PHE121 | G | LYS63 | 2.82 | Hydrogen bond |
| Chain A↔Chain G | A | LEU115 | G | LEU72 | 2.75 | Hydrogen bond (Hydrophobic) |
| Chain A↔Chain G | A | LEU115 | G | LEU75 |  | Hydrophobic |
| Chain A↔Chain G | A | PHE121 | G | PRO61 |  | Hydrophobic |
| Chain A↔Chain G | A | PHE121 | G | ARG114 | 5.60 | Cation–π |

| **Interface** | **Chain1** | **gp58** | **Chain2** | **gp59** | **Disatnce (Å)** | **Bond type** |
| --- | --- | --- | --- | --- | --- | --- |
| Chain G↔Chain M | G | ASP456 | M | SER317 | 2.77 | Hydrogen bond |
| Chain G↔Chain M | G | LYS477 | M | GLU38 | 2.89 | Salt bridge (Electrostatic, Hydrogen bond) |
| Chain G↔Chain M | G | ARG478 | M | ASP505 | 2.99 | Salt bridge (Electrostatic, Hydrogen bond) |
| Chain G↔Chain M | G | ARG478 | M | THR501 | 3.06 | Hydrogen bond |
| Chain G↔Chain M | G | ASN510 | M | LYS302 | 2.89 | Hydrogen bond |
| Chain G↔Chain M | G | LYS522 | M | GLU44 | 3.44 | Salt bridge (Electrostatic, Hydrogen bond) |
| Chain G↔Chain M | G | LYS522 | M | GLU43 | 3.49 | Salt bridge (Electrostatic, Hydrogen bond) |
| Chain G↔Chain M | G | ASN531 | M | ASP505 | 3.25 | Hydrogen bond |
| Chain G↔Chain M | G | ARG539 | M | TYR500 | 3.14 | Hydrogen bond (Cation–π) |
| Chain G↔Chain M | G | SER367 | M | GLY28 | 2.82 | Hydrogen bond |
| Chain G↔Chain M | G | MET457 | M | ARG320 | 3.12 | Hydrogen bond |
| Chain G↔Chain M | G | ARG472 | M | ALA41 | 3.09 | Hydrogen bond |
| Chain G↔Chain M | G | ARG478 | M | GLY497 | 2.90 | Hydrogen bond |
| Chain G↔Chain M | G | ARG478 | M | GLU44 | 2.93 | Hydrogen bond (Electrostatic) |
| Chain G↔Chain M | G | SER505 | M | LYS302 | 2.84 | Hydrogen bond |
| Chain G↔Chain M | G | SER505 | M | ARG304 | 2.87 | Hydrogen bond |
| Chain G↔Chain M | G | SER508 | M | ARG117 | 2.97 | Hydrogen bond |
| Chain G↔Chain M | G | GLY509 | M | ASP271 | 2.82 | Hydrogen bond |
| Chain G↔Chain M | G | ASN510 | M | PRO280 | 2.89 | Hydrogen bond |
| Chain G↔Chain M | G | ASN531 | M | LYS504 | 2.83 | Hydrogen bond |
| Chain G↔Chain M | G | TYR533 | M | VAL499 | 2.87 | Hydrogen bond |
| Chain G↔Chain M | G | ARG539 | M | ARG519 | 3.18 | Hydrogen bond |
| Chain G↔Chain M | G | GLU368 | M | LEU26 | 3.50 | Hydrogen bond |
| Chain G↔Chain M | G | ARG478 | M | GLU498 | 3.41 | Hydrogen bond |
| Chain G↔Chain M | G | ARG472 | M | GLU38 | 3.61 | Salt bridge (Electrostatic) |
| Chain G↔Chain M | G | GLU537 | M | ARG320 | 3.64 | Salt bridge (Electrostatic) |
| Chain G↔Chain M | G | ASP99 | M | LYS371 | 4.90 | Electrostatic |
| Chain G↔Chain M | G | LYS136 | M | ASP7 | 4.74 | Electrostatic |
| Chain G↔Chain M | G | ARG187 | M | GLU42 | 5.55 | Electrostatic |
| Chain G↔Chain M | G | ARG437 | M | GLU38 | 4.66 | Electrostatic |
| Chain G↔Chain M | G | LYS477 | M | GLU42 | 5.07 | Electrostatic |
| Chain G↔Chain M | G | TYR46 | M | TRP8 | 6.68 | Hydrophobic (π–π stacking) |
| Chain G↔Chain M | G | VAL98 | M | PRO368 |  | Hydrophobic |
| Chain G↔Chain M | G | TYR189 | M | MET31 |  | Hydrophobic |
| Chain G↔Chain M | G | VAL192 | M | PRO30 |  | Hydrophobic |
| Chain G↔Chain M | G | VAL192 | M | ALA34 |  | Hydrophobic |
| Chain G↔Chain M | G | VAL192 | M | MET31 |  | Hydrophobic |
| Chain G↔Chain M | G | ALA450 | M | ALA318 |  | Hydrophobic |
| Chain G↔Chain M | G | VAL458 | M | ALA318 |  | Hydrophobic |
| Chain G↔Chain M | G | VAL468 | M | LEU26 |  | Hydrophobic |
| Chain G↔Chain M | G | PRO475 | M | ILE364 |  | Hydrophobic |
| Chain G↔Chain M | G | VAL481 | M | ALA41 |  | Hydrophobic |
| Chain G↔Chain M | G | LEU483 | M | ILE25 |  | Hydrophobic |
| Chain G↔Chain M | G | LEU483 | M | ALA37 |  | Hydrophobic |
| Chain G↔Chain M | G | LEU483 | M | LEU40 |  | Hydrophobic |
| Chain G↔Chain M | G | PHE503 | M | TRP360 |  | Hydrophobic |
| Chain G↔Chain M | G | PHE503 | M | PHE507 | 6.04 | Hydrophobic (π–π stacking) |
| Chain G↔Chain M | G | PHE506 | M | VAL357 |  | Hydrophobic |
| Chain G↔Chain M | G | PHE506 | M | TRP360 | 5.57 | Hydrophobic (π–π stacking) |
| Chain G↔Chain M | G | PHE506 | M | PHE507 | 4.74 | Hydrophobic (π–π stacking) |
| Chain G↔Chain M | G | LEU515 | M | PHE507 |  | Hydrophobic |
| Chain G↔Chain M | G | LEU515 | M | ILE116 |  | Hydrophobic |
| Chain G↔Chain M | G | PHE523 | M | LEU40 |  | Hydrophobic |
| Chain G↔Chain M | G | PHE523 | M | LEU18 |  | Hydrophobic |
| Chain G↔Chain M | G | TYR533 | M | TRP360 |  | Hydrophobic |
| Chain G↔Chain M | G | TYR533 | M | TYR500 |  | Hydrophobic |
| Chain G↔Chain M | G | ALA574 | M | ALA34 |  | Hydrophobic |
| Chain G↔Chain M | G | TYR447 | M | ARG320 | 5.77 | Cation–π |
| Chain G↔Chain O | G | GLN92 | O | LYS90 | 2.94 | Hydrogen bond |
| Chain G↔Chain O | G | THR96 | O | LYS90 | 2.90 | Hydrogen bond |
| Chain G↔Chain O | G | GLN87 | O | GLY91 | 3.45 | Hydrogen bond |
| Chain G↔Chain O | G | ALA90 | O | VAL70 | 2.84 | Hydrogen bond |
| Chain G↔Chain O | G | ILE85 | O | ALA133 |  | Hydrophobic |
| Chain G↔Chain O | G | ALA90 | O | ILE3 |  | Hydrophobic |

| **Interface** | **Chain1** | **gp49** | **Chain2** | **gp60** | **Disatnce (Å)** | **Bond type** |
| --- | --- | --- | --- | --- | --- | --- |
| Chain G↔Chain b | G | ARG35 | b | ASP12 | 2.91 | Salt bridge (Electrostatic, Hydrogen bond) |
| Chain G↔Chain b | G | LYS37 | b | ASP12 | 3.43 | Salt bridge (Electrostatic, Hydrogen bond) |
| Chain G↔Chain b | G | THR455 | b | ARG94 | 3.00 | Hydrogen bond |
| Chain G↔Chain b | G | SER557 | b | GLU90 | 3.34 | Hydrogen bond |
| Chain G↔Chain b | G | ARG425 | b | GLU90 | 4.58 | Electrostatic |
| Chain G↔Chain b | G | VAL13 | b | LEU28 |  | Hydrophobic |
| Chain G↔Chain b | G | VAL13 | b | PRO32 |  | Hydrophobic |
| Chain G↔Chain b | G | LEU234 | b | ALA42 |  | Hydrophobic |
| Chain G↔Chain b | G | LEU234 | b | PRO43 |  | Hydrophobic |
| Chain G↔Chain b | G | ILE237 | b | LEU47 |  | Hydrophobic |
| Chain G↔Chain b | G | ILE237 | b | PRO43 |  | Hydrophobic |
| Chain G↔Chain b | G | PHE238 | b | LEU47 |  | Hydrophobic |
| Chain G↔Chain b | G | PHE238 | b | PRO43 |  | Hydrophobic |
| Chain G↔Chain b | G | TRP284 | b | PHE37 | 6.91 | Hydrophobic (π–π stacking) |
| Chain G↔Chain b | G | ILE336 | b | TRP30 |  | Hydrophobic |
| Chain G↔Chain b | G | TRP284 | b | ARG25 | 4.56 | Cation–π |
| Chain G↔Chain c | G | GLY147 | c | ASN35 | 2.76 | Hydrogen bond |
| Chain G↔Chain c | G | ILE25 | c | ALA41 |  | Hydrophobic |
| Chain G↔Chain c | G | ILE25 | c | PRO43 |  | Hydrophobic |
| Chain G↔Chain c | G | ALA30 | c | ALA41 |  | Hydrophobic |
| Chain G↔Chain c | G | PHE33 | c | ALA39 |  | Hydrophobic |
| Chain G↔Chain c | G | PHE33 | c | ALA41 |  | Hydrophobic |
| Chain G↔Chain c | G | LEU34 | c | LEU47 |  | Hydrophobic |
| Chain G↔Chain c | G | LEU34 | c | ALA39 |  | Hydrophobic |
| Chain G↔Chain c | G | LEU34 | c | ALA41 |  | Hydrophobic |
| Chain G↔Chain c | G | PHE143 | c | PHE37 | 5.59 | Hydrophobic (π–π stacking) |
| Chain G↔Chain c | G | TRP284 | c | ILE11 |  | Hydrophobic |
| Chain G↔Chain c | G | PHE315 | c | ILE11 |  | Hydrophobic |
| Chain G↔Chain c | G | PHE315 | c | LYS14 | 4.51 | Cation–π |
| Chain G↔Chain d | G | ARG19 | d | ASP31 | 2.93 | Salt bridge (Electrostatic, Hydrogen bond) |
| Chain G↔Chain d | G | ARG19 | d | SER33 | 3.15 | Hydrogen bond |
| Chain G↔Chain d | G | ARG44 | d | ASP29 | 3.12 | Salt bridge (Electrostatic, Hydrogen bond) |
| Chain G↔Chain d | G | SER141 | d | ASP29 | 3.33 | Hydrogen bond |
| Chain G↔Chain d | G | ARG150 | d | ASP29 | 3.22 | Salt bridge (Electrostatic, Hydrogen bond) |
| Chain G↔Chain d | G | GLN364 | d | ASN49 | 3.24 | Hydrogen bond |
| Chain G↔Chain d | G | ASN15 | d | LEU28 | 3.32 | Hydrogen bond |
| Chain G↔Chain d | G | ARG230 | d | THR4 | 3.37 | Hydrogen bond |
| Chain G↔Chain d | G | ARG425 | d | LEU47 | 3.04 | Hydrogen bond |
| Chain G↔Chain d | G | ILE25 | d | SER34 | 3.19 | Hydrogen bond |
| Chain G↔Chain d | G | PRO282 | d | VAL10 | 3.49 | Hydrogen bond |
| Chain G↔Chain d | G | VAL13 | d | TRP30 |  | Hydrophobic |
| Chain G↔Chain d | G | ILE25 | d | MET36 |  | Hydrophobic |
| Chain G↔Chain d | G | PHE33 | d | ILE38 |  | Hydrophobic |
| Chain G↔Chain d | G | MET58 | d | MET36 |  | Hydrophobic |
| Chain G↔Chain d | G | PHE143 | d | VAL40 |  | Hydrophobic |
| Chain G↔Chain d | G | PHE143 | d | ILE38 |  | Hydrophobic |
| Chain G↔Chain d | G | TYR189 | d | ALA42 |  | Hydrophobic |
| Chain G↔Chain d | G | TYR189 | d | PRO43 |  | Hydrophobic |
| Chain G↔Chain d | G | TYR189 | d | VAL40 |  | Hydrophobic |
| Chain G↔Chain d | G | LEU234 | d | VAL8 |  | Hydrophobic |
| Chain G↔Chain d | G | PHE238 | d | VAL54 |  | Hydrophobic |
| Chain G↔Chain d | G | PHE238 | d | LEU17 |  | Hydrophobic |
| Chain G↔Chain d | G | TRP284 | d | ILE11 |  | Hydrophobic |
| Chain G↔Chain d | G | VAL427 | d | LEU47 |  | Hydrophobic |
| Chain G↔Chain d | G | VAL429 | d | PRO43 |  | Hydrophobic |
| Chain G↔Chain d | G | PRO555 | d | LEU47 |  | Hydrophobic |
| Chain G↔Chain d | G | PRO577 | d | PRO43 |  | Hydrophobic |
| Chain G↔Chain g | G | ARG331 | g | THR79 | 2.85 | Hydrogen bond |
| Chain G↔Chain g | G | ARG331 | g | ASP77 | 3.06 | Salt bridge (Electrostatic, Hydrogen bond) |
| Chain G↔Chain g | G | LYS373 | g | ASP76 | 2.87 | Salt bridge (Electrostatic, Hydrogen bond) |
| Chain G↔Chain g | G | THR371 | g | THR79 | 2.85 | Hydrogen bond |
| Chain G↔Chain g | G | LYS373 | g | ASP77 | 3.09 | Hydrogen bond |
| Chain G↔Chain g | G | LYS494 | g | ASP106 | 4.73 | Electrostatic |
| Chain G↔Chain g | G | VAL486 | g | PRO78 |  | Hydrophobic |
| Chain G↔Chain g | G | PRO490 | g | TRP75 |  | Hydrophobic |

**Supplementary Tables 4b**

**gp58 (DTP) chain G interactions (Intra)**

| **Interface** | **Chain1** | **gp58** | **Chain2** | **gp58** | **Disatnce (Å)** | **Bond type** |
| --- | --- | --- | --- | --- | --- | --- |
| Chain G↔Chain H | G | LYS135 | H | ASP99 | 2.94 | Salt bridge (Electrostatic, Hydrogen bond) |
| Chain G↔Chain H | G | ARG476 | H | ASP93 | 3.15 | Salt bridge (Electrostatic, Hydrogen bond) |
| Chain G↔Chain H | G | ASP47 | H | ALA549 | 2.94 | Hydrogen bond |
| Chain G↔Chain H | G | TYR102 | H | ASP93 | 3.33 | Hydrogen bond |
| Chain G↔Chain H | G | ARG126 | H | MET583 | 2.77 | Hydrogen bond |
| Chain G↔Chain H | G | ILE129 | H | ARG580 | 3.31 | Hydrogen bond |
| Chain G↔Chain H | G | TRP157 | H | TRP82 | 3.41 | Hydrogen bond (Hydrophobic, π–π stacking) |
| Chain G↔Chain H | G | THR158 | H | GLN84 | 2.75 | Hydrogen bond |
| Chain G↔Chain H | G | THR158 | H | TRP82 | 2.93 | Hydrogen bond |
| Chain G↔Chain H | G | ASN160 | H | ILE79 | 2.73 | Hydrogen bond |
| Chain G↔Chain H | G | ARG476 | H | THR91 | 2.94 | Hydrogen bond |
| Chain G↔Chain H | G | TYR102 | H | GLY94 | 2.91 | Hydrogen bond |
| Chain G↔Chain H | G | LEU165 | H | LEU75 | 2.72 | Hydrogen bond (Hydrophobic) |
| Chain G↔Chain H | G | HIS182 | H | VAL95 | 2.97 | Hydrogen bond |
| Chain G↔Chain H | G | ASP103 | H | LYS88 | 5.14 | Electrostatic |
| Chain G↔Chain H | G | GLU119 | H | LYS37 | 4.13 | Electrostatic |
| Chain G↔Chain H | G | ASP133 | H | ARG580 | 5.32 | Electrostatic |
| Chain G↔Chain H | G | LYS180 | H | GLU86 | 4.32 | Electrostatic |
| Chain G↔Chain H | G | VAL17 | H | ALA550 |  | Hydrophobic |
| Chain G↔Chain H | G | MET50 | H | ALA549 |  | Hydrophobic |
| Chain G↔Chain H | G | MET50 | H | ALA550 |  | Hydrophobic |
| Chain G↔Chain H | G | PRO104 | H | VAL95 |  | Hydrophobic |
| Chain G↔Chain H | G | VAL125 | H | TRP581 |  | Hydrophobic |
| Chain G↔Chain H | G | ILE129 | H | ILE79 |  | Hydrophobic |
| Chain G↔Chain H | G | ILE129 | H | TRP581 |  | Hydrophobic |
| Chain G↔Chain H | G | ALA130 | H | ALA549 |  | Hydrophobic |
| Chain G↔Chain H | G | ALA134 | H | ALA100 |  | Hydrophobic |
| Chain G↔Chain H | G | ALA134 | H | TRP82 |  | Hydrophobic |
| Chain G↔Chain H | G | ALA134 | H | TYR102 |  | Hydrophobic |
| Chain G↔Chain H | G | TRP157 | H | ILE79 |  | Hydrophobic |
| Chain G↔Chain H | G | PRO161 | H | ILE79 |  | Hydrophobic |
| Chain G↔Chain H | G | LEU165 | H | TRP581 |  | Hydrophobic |
| Chain G↔Chain H | G | PHE170 | H | PRO39 |  | Hydrophobic |
| Chain G↔Chain H | G | PHE175 | H | TRP581 | 6.52 | π–π stacking |
| Chain G↔Chain H | G | TRP157 | H | ARG580 | 4.55 | Cation–π |
| Chain G↔Chain H | G | PHE170 | H | LYS38 | 5.59 | Cation–π |
| Chain G↔Chain L | G | ASN36 | L | GLU119 | 2.89 | Hydrogen bond |
| Chain G↔Chain L | G | GLU86 | L | LYS180 | 2.89 | Salt bridge (Electrostatic, Hydrogen bond) |
| Chain G↔Chain L | G | LYS88 | L | ASP103 | 2.97 | Salt bridge (Electrostatic, Hydrogen bond) |
| Chain G↔Chain L | G | ASP93 | L | ARG476 | 2.92 | Salt bridge (Electrostatic, Hydrogen bond) |
| Chain G↔Chain L | G | ASP99 | L | LYS135 | 2.86 | Salt bridge (Electrostatic, Hydrogen bond) |
| Chain G↔Chain L | G | THR148 | L | ARG126 | 3.03 | Hydrogen bond |
| Chain G↔Chain L | G | ILE79 | L | ASN160 | 3.14 | Hydrogen bond |
| Chain G↔Chain L | G | TRP82 | L | TRP157 | 2.95 | Hydrogen bond (Hydrophobic, π–π stacking) |
| Chain G↔Chain L | G | TRP82 | L | THR158 | 3.02 | Hydrogen bond |
| Chain G↔Chain L | G | ASP93 | L | TYR102 | 2.93 | Hydrogen bond |
| Chain G↔Chain L | G | ALA549 | L | ASP47 | 2.78 | Hydrogen bond |
| Chain G↔Chain L | G | ALA550 | L | THR49 | 3.47 | Hydrogen bond |
| Chain G↔Chain L | G | ARG580 | L | ILE129 | 3.01 | Hydrogen bond |
| Chain G↔Chain L | G | MET583 | L | ARG126 | 2.90 | Hydrogen bond |
| Chain G↔Chain L | G | LEU75 | L | LEU165 | 2.74 | Hydrogen bond (Hydrophobic) |
| Chain G↔Chain L | G | GLY94 | L | TYR102 | 2.81 | Hydrogen bond |
| Chain G↔Chain L | G | VAL95 | L | HIS182 | 2.96 | Hydrogen bond |
| Chain G↔Chain L | G | ARG580 | L | ASP133 | 3.75 | Salt bridge (Electrostatic) |
| Chain G↔Chain L | G | ASP108 | L | LYS164 | 5.95 | Electrostatic |
| Chain G↔Chain L | G | PRO39 | L | PHE170 |  | Hydrophobic |
| Chain G↔Chain L | G | ILE79 | L | ILE129 |  | Hydrophobic |
| Chain G↔Chain L | G | ILE79 | L | TRP157 |  | Hydrophobic |
| Chain G↔Chain L | G | ILE79 | L | PRO161 |  | Hydrophobic |
| Chain G↔Chain L | G | TRP82 | L | ALA134 |  | Hydrophobic |
| Chain G↔Chain L | G | VAL95 | L | PRO104 |  | Hydrophobic |
| Chain G↔Chain L | G | ALA100 | L | ALA134 |  | Hydrophobic |
| Chain G↔Chain L | G | TYR102 | L | ALA134 |  | Hydrophobic |
| Chain G↔Chain L | G | ALA549 | L | TYR46 |  | Hydrophobic |
| Chain G↔Chain L | G | ALA550 | L | VAL17 |  | Hydrophobic |
| Chain G↔Chain L | G | ALA550 | L | MET50 |  | Hydrophobic |
| Chain G↔Chain L | G | TRP581 | L | ILE129 |  | Hydrophobic |
| Chain G↔Chain L | G | TRP581 | L | VAL125 |  | Hydrophobic |
| Chain G↔Chain L | G | TRP581 | L | LEU165 |  | Hydrophobic |
| Chain G↔Chain L | G | MET583 | L | PHE170 |  | Hydrophobic |
| Chain G↔Chain L | G | MET583 | L | LEU165 |  | Hydrophobic |
| Chain G↔Chain L | G | TRP581 | L | PHE175 | 6.57 | π–π stacking |
| Chain G↔Chain L | G | ARG580 | L | TRP157 | 4.74 | Cation–π |

**Supplementary Tables 4c**

**gp59 (BHP) chain M /gp58 (DTP)/gp60 (BppU)/gp61 (CFP) inter complex interactions**

| **Interface** | **Chain1** | **gp58** | **Chain2** | **gp59** | **Disatnce (Å)** | **Bond type** |
| --- | --- | --- | --- | --- | --- | --- |
| Chain G↔Chain M | G | ASP456 | M | SER317 | 2.77 | Hydrogen bond |
| Chain G↔Chain M | G | LYS477 | M | GLU38 | 2.89 | Salt bridge (Electrostatic, Hydrogen bond) |
| Chain G↔Chain M | G | ARG478 | M | ASP505 | 2.99 | Salt bridge (Electrostatic, Hydrogen bond) |
| Chain G↔Chain M | G | ARG478 | M | THR501 | 3.06 | Hydrogen bond |
| Chain G↔Chain M | G | ASN510 | M | LYS302 | 2.89 | Hydrogen bond |
| Chain G↔Chain M | G | LYS522 | M | GLU44 | 3.44 | Salt bridge (Electrostatic, Hydrogen bond) |
| Chain G↔Chain M | G | LYS522 | M | GLU43 | 3.49 | Salt bridge (Electrostatic, Hydrogen bond) |
| Chain G↔Chain M | G | ASN531 | M | ASP505 | 3.25 | Hydrogen bond |
| Chain G↔Chain M | G | ARG539 | M | TYR500 | 3.14 | Hydrogen bond (Cation–π) |
| Chain G↔Chain M | G | SER367 | M | GLY28 | 2.82 | Hydrogen bond |
| Chain G↔Chain M | G | MET457 | M | ARG320 | 3.12 | Hydrogen bond |
| Chain G↔Chain M | G | ARG472 | M | ALA41 | 3.09 | Hydrogen bond |
| Chain G↔Chain M | G | ARG478 | M | GLY497 | 2.90 | Hydrogen bond |
| Chain G↔Chain M | G | ARG478 | M | GLU44 | 2.93 | Hydrogen bond (Electrostatic) |
| Chain G↔Chain M | G | SER505 | M | LYS302 | 2.84 | Hydrogen bond |
| Chain G↔Chain M | G | SER505 | M | ARG304 | 2.87 | Hydrogen bond |
| Chain G↔Chain M | G | SER508 | M | ARG117 | 2.97 | Hydrogen bond |
| Chain G↔Chain M | G | GLY509 | M | ASP271 | 2.82 | Hydrogen bond |
| Chain G↔Chain M | G | ASN510 | M | PRO280 | 2.89 | Hydrogen bond |
| Chain G↔Chain M | G | ASN531 | M | LYS504 | 2.83 | Hydrogen bond |
| Chain G↔Chain M | G | TYR533 | M | VAL499 | 2.87 | Hydrogen bond |
| Chain G↔Chain M | G | ARG539 | M | ARG519 | 3.18 | Hydrogen bond |
| Chain G↔Chain M | G | GLU368 | M | LEU26 | 3.50 | Hydrogen bond |
| Chain G↔Chain M | G | ARG478 | M | GLU498 | 3.41 | Hydrogen bond |
| Chain G↔Chain M | G | ARG472 | M | GLU38 | 3.61 | Salt bridge (Electrostatic) |
| Chain G↔Chain M | G | GLU537 | M | ARG320 | 3.64 | Salt bridge (Electrostatic) |
| Chain G↔Chain M | G | ASP99 | M | LYS371 | 4.90 | Electrostatic |
| Chain G↔Chain M | G | LYS136 | M | ASP7 | 4.74 | Electrostatic |
| Chain G↔Chain M | G | ARG187 | M | GLU42 | 5.55 | Electrostatic |
| Chain G↔Chain M | G | ARG437 | M | GLU38 | 4.66 | Electrostatic |
| Chain G↔Chain M | G | LYS477 | M | GLU42 | 5.07 | Electrostatic |
| Chain G↔Chain M | G | TYR46 | M | TRP8 | 6.68 | Hydrophobic (π–π stacking) |
| Chain G↔Chain M | G | VAL98 | M | PRO368 |  | Hydrophobic |
| Chain G↔Chain M | G | TYR189 | M | MET31 |  | Hydrophobic |
| Chain G↔Chain M | G | VAL192 | M | PRO30 |  | Hydrophobic |
| Chain G↔Chain M | G | VAL192 | M | ALA34 |  | Hydrophobic |
| Chain G↔Chain M | G | VAL192 | M | MET31 |  | Hydrophobic |
| Chain G↔Chain M | G | ALA450 | M | ALA318 |  | Hydrophobic |
| Chain G↔Chain M | G | VAL458 | M | ALA318 |  | Hydrophobic |
| Chain G↔Chain M | G | VAL468 | M | LEU26 |  | Hydrophobic |
| Chain G↔Chain M | G | PRO475 | M | ILE364 |  | Hydrophobic |
| Chain G↔Chain M | G | VAL481 | M | ALA41 |  | Hydrophobic |
| Chain G↔Chain M | G | LEU483 | M | ILE25 |  | Hydrophobic |
| Chain G↔Chain M | G | LEU483 | M | ALA37 |  | Hydrophobic |
| Chain G↔Chain M | G | LEU483 | M | LEU40 |  | Hydrophobic |
| Chain G↔Chain M | G | PHE503 | M | TRP360 |  | Hydrophobic |
| Chain G↔Chain M | G | PHE503 | M | PHE507 | 6.04 | Hydrophobic (π–π stacking) |
| Chain G↔Chain M | G | PHE506 | M | VAL357 |  | Hydrophobic |
| Chain G↔Chain M | G | PHE506 | M | TRP360 | 5.57 | Hydrophobic (π–π stacking) |
| Chain G↔Chain M | G | PHE506 | M | PHE507 | 4.74 | Hydrophobic (π–π stacking) |
| Chain G↔Chain M | G | LEU515 | M | PHE507 |  | Hydrophobic |
| Chain G↔Chain M | G | LEU515 | M | ILE116 |  | Hydrophobic |
| Chain G↔Chain M | G | PHE523 | M | LEU40 |  | Hydrophobic |
| Chain G↔Chain M | G | PHE523 | M | LEU18 |  | Hydrophobic |
| Chain G↔Chain M | G | TYR533 | M | TRP360 |  | Hydrophobic |
| Chain G↔Chain M | G | TYR533 | M | TYR500 |  | Hydrophobic |
| Chain G↔Chain M | G | ALA574 | M | ALA34 |  | Hydrophobic |
| Chain G↔Chain M | G | TYR447 | M | ARG320 | 5.77 | Cation–π |

| **Interface** | **Chain1** | **gp58** | **Chain2** | **gp59** | **Disatnce (Å)** | **Bond type** |
| --- | --- | --- | --- | --- | --- | --- |
| Chain H↔Chain M | H | GLN87 | M | ARG495 | 3.36 | Hydrogen bond |
| Chain H↔Chain M | H | THR96 | M | GLU498 | 3.34 | Hydrogen bond |
| Chain H↔Chain M | H | ARG478 | M | GLU65 | 2.77 | Salt bridge (Electrostatic, Hydrogen bond) |
| Chain H↔Chain M | H | GLN491 | M | TYR127 | 3.25 | Hydrogen bond |
| Chain H↔Chain M | H | TYR533 | M | GLU65 | 3.31 | Hydrogen bond |
| Chain H↔Chain M | H | ARG539 | M | GLU50 | 3.48 | Salt bridge (Electrostatic, Hydrogen bond) |
| Chain H↔Chain M | H | GLN87 | M | THR537 | 2.98 | Hydrogen bond |
| Chain H↔Chain M | H | LYS88 | M | ARG495 | 3.00 | Hydrogen bond |
| Chain H↔Chain M | H | THR91 | M | LYS371 | 3.11 | Hydrogen bond |
| Chain H↔Chain M | H | THR91 | M | GLY372 | 3.12 | Hydrogen bond |
| Chain H↔Chain M | H | GLN491 | M | GLY91 | 3.32 | Hydrogen bond |
| Chain H↔Chain M | H | LYS542 | M | GLU9 | 2.81 | Hydrogen bond |
| Chain H↔Chain M | H | LYS542 | M | ASP7 | 3.46 | Hydrogen bond (Electrostatic) |
| Chain H↔Chain M | H | ALA90 | M | VAL374 | 3.17 | Hydrogen bond |
| Chain H↔Chain M | H | ARG476 | M | GLU68 | 2.75 | Hydrogen bond |
| Chain H↔Chain M | H | ASP93 | M | LYS371 | 3.80 | Salt bridge (Electrostatic) |
| Chain H↔Chain M | H | ARG472 | M | GLU94 | 3.63 | Salt bridge (Electrostatic) |
| Chain H↔Chain M | H | ARG539 | M | GLU65 | 3.56 | Salt bridge (Electrostatic) |
| Chain H↔Chain M | H | LYS477 | M | GLU68 | 5.86 | Electrostatic |
| Chain H↔Chain M | H | ALA90 | M | PRO366 |  | Hydrophobic |
| Chain H↔Chain M | H | VAL98 | M | VAL46 |  | Hydrophobic |
| Chain H↔Chain M | H | PRO433 | M | TRP8 |  | Hydrophobic |
| Chain H↔Chain M | H | PRO452 | M | PRO10 |  | Hydrophobic |
| Chain H↔Chain M | H | PRO543 | M | TRP8 |  | Hydrophobic |
| Chain H↔Chain M | H | PRO545 | M | TRP8 |  | Hydrophobic |
| Chain H↔Chain M | H | PRO545 | M | PRO10 |  | Hydrophobic |
| Chain H↔Chain M | H | PRO546 | M | TRP8 |  | Hydrophobic |
| Chain H↔Chain M | H | TYR556 | M | PRO10 |  | Hydrophobic |

| **Interface** | **Chain1** | **gp58** | **Chain2** | **gp59** | **Disatnce (Å)** | **Bond type** |
| --- | --- | --- | --- | --- | --- | --- |
| Chain I↔Chain M | I | GLN92 | M | LYS90 | 2.91 | Hydrogen bond |
| Chain I↔Chain M | I | THR96 | M | LYS90 | 2.84 | Hydrogen bond |
| Chain I↔Chain M | I | GLN87 | M | GLY91 | 3.44 | Hydrogen bond |
| Chain I↔Chain M | I | ALA90 | M | VAL70 | 2.86 | Hydrogen bond |
| Chain I↔Chain M | I | ILE85 | M | ALA133 |  | Hydrophobic |
| Chain I↔Chain M | I | ALA90 | M | ILE3 |  | Hydrophobic |
| Chain I↔Chain M | I | VAL98 | M | ALA133 |  | Hydrophobic |

| **Interface** | **Chain1** | **gp59** | **Chain2** | **gp61** | **Disatnce (Å)** | **Bond type** |
| --- | --- | --- | --- | --- | --- | --- |
| Chain M↔Chain P | M | ASP223 | P | ASN14 | 3.48 | Hydrogen bond |
| Chain M↔Chain P | M | LYS397 | P | GLU29 | 2.68 | Salt bridge (Electrostatic, Hydrogen bond) |
| Chain M↔Chain P | M | ASP412 | P | GLN42 | 2.85 | Hydrogen bond |
| Chain M↔Chain P | M | ASN470 | P | ASN25 | 2.79 | Hydrogen bond |
| Chain M↔Chain P | M | ILE169 | P | ARG20 | 3.02 | Hydrogen bond |
| Chain M↔Chain P | M | ARG233 | P | ASN14 | 3.04 | Hydrogen bond |
| Chain M↔Chain P | M | ARG233 | P | VAL12 | 3.05 | Hydrogen bond |
| Chain M↔Chain P | M | ARG233 | P | TRP11 | 3.20 | Hydrogen bond |
| Chain M↔Chain P | M | LYS397 | P | GLN27 | 2.98 | Hydrogen bond |
| Chain M↔Chain P | M | ASN400 | P | GLU29 | 3.12 | Hydrogen bond |
| Chain M↔Chain P | M | ASN404 | P | GLU29 | 3.38 | Hydrogen bond |
| Chain M↔Chain P | M | ILE416 | P | SER46 | 2.96 | Hydrogen bond |
| Chain M↔Chain P | M | PRO468 | P | ASN25 | 3.28 | Hydrogen bond |
| Chain M↔Chain P | M | ASP223 | P | ARG17 | 3.98 | Salt bridge (Electrostatic) |
| Chain M↔Chain P | M | GLU184 | P | ARG20 | 4.87 | Electrostatic |
| Chain M↔Chain P | M | TRP156 | P | VAL15 |  | Hydrophobic |
| Chain M↔Chain P | M | TRP157 | P | VAL19 |  | Hydrophobic |
| Chain M↔Chain P | M | PHE165 | P | VAL19 |  | Hydrophobic |
| Chain M↔Chain P | M | ILE169 | P | LEU22 |  | Hydrophobic |
| Chain M↔Chain P | M | ILE171 | P | LEU22 |  | Hydrophobic |
| Chain M↔Chain P | M | MET183 | P | VAL15 |  | Hydrophobic |
| Chain M↔Chain P | M | LEU187 | P | VAL15 |  | Hydrophobic |
| Chain M↔Chain P | M | PRO236 | P | TRP11 |  | Hydrophobic |
| Chain M↔Chain P | M | TRP283 | P | PRO9 |  | Hydrophobic |
| Chain M↔Chain P | M | TRP283 | P | TRP11 | 5.78 | Hydrophobic (π–π stacking) |
| Chain M↔Chain P | M | TRP283 | P | VAL12 |  | Hydrophobic |
| Chain M↔Chain P | M | PHE287 | P | ILE8 |  | Hydrophobic |
| Chain M↔Chain P | M | MET403 | P | TRP28 |  | Hydrophobic |
| Chain M↔Chain P | M | PHE407 | P | MET36 |  | Hydrophobic |
| Chain M↔Chain P | M | PHE407 | P | ILE31 |  | Hydrophobic |
| Chain M↔Chain P | M | PHE407 | P | LEU39 |  | Hydrophobic |
| Chain M↔Chain P | M | ILE411 | P | LEU39 |  | Hydrophobic |
| Chain M↔Chain P | M | LEU417 | P | PHE64 |  | Hydrophobic |
| Chain M↔Chain P | M | ILE418 | P | PRO61 |  | Hydrophobic |
| Chain M↔Chain P | M | ILE418 | P | PHE59 |  | Hydrophobic |
| Chain M↔Chain P | M | PHE420 | P | PHE64 | 5.29 | Hydrophobic (π–π stacking) |
| Chain M↔Chain P | M | LEU427 | P | MET35 |  | Hydrophobic |
| Chain M↔Chain P | M | TYR469 | P | LEU22 |  | Hydrophobic |
| Chain M↔Chain P | M | ILE471 | P | LEU22 |  | Hydrophobic |
| Chain M↔Chain P | M | TRP156 | P | ARG17 | 4.71 | Cation–π |

| **Interface** | **Chain1** | **gp59** | **Chain2** | **gp60** | **Disatnce (Å)** | **Bond type** |
| --- | --- | --- | --- | --- | --- | --- |
| Chain M↔Chain c | M | ASN426 | c | SER158 | 2.89 | Hydrogen bond |
| Chain M↔Chain c | M | GLU429 | c | TYR163 | 3.41 | Hydrogen bond |
| Chain M↔Chain c | M | PRO424 | c | SER158 | 2.77 | Hydrogen bond |
| Chain M↔Chain d | M | ASP29 | d | ARG25 | 2.91 | Salt bridge (Electrostatic, Hydrogen bond) |
| Chain M↔Chain d | M | THR32 | d | ARG25 | 2.91 | Hydrogen bond |
| Chain M↔Chain d | M | MET31 | d | ALA42 |  | Hydrophobic |
| Chain M↔Chain h | M | ARG208 | h | LEU122 | 2.78 | Hydrogen bond |
| Chain M↔Chain h | M | TRP157 | h | ALA151 |  | Hydrophobic |
| Chain M↔Chain h | M | LEU158 | h | PRO169 |  | Hydrophobic |
| Chain M↔Chain h | M | PRO159 | h | PRO169 |  | Hydrophobic |
| Chain M↔Chain h | M | PRO159 | h | VAL251 |  | Hydrophobic |
| Chain M↔Chain h | M | ALA162 | h | VAL251 |  | Hydrophobic |
| Chain M↔Chain h | M | ALA162 | h | TYR253 |  | Hydrophobic |

**Supplementary Tables 4c**

**gp59 (BHP) chainM interactions (Intra)**

| **Interface** | **Chain1** | **gp59** | **Chain2** | **gp59** | **Disatnce (Å)** | **Bond type** |
| --- | --- | --- | --- | --- | --- | --- |
| Chain M↔Chain N | M | ASP97 | N | ARG521 | 2.76 | Salt bridge (Electrostatic, Hydrogen bond) |
| Chain M↔Chain N | M | ASP123 | N | LYS385 | 2.79 | Salt bridge (Electrostatic, Hydrogen bond) |
| Chain M↔Chain N | M | ASP126 | N | ARG378 | 2.92 | Salt bridge (Electrostatic, Hydrogen bond) |
| Chain M↔Chain N | M | ASP126 | N | SER380 | 3.04 | Hydrogen bond |
| Chain M↔Chain N | M | TYR127 | N | GLU367 | 2.97 | Hydrogen bond |
| Chain M↔Chain N | M | TRP153 | N | GLU459 | 3.43 | Hydrogen bond |
| Chain M↔Chain N | M | SER166 | N | ASN434 | 3.35 | Hydrogen bond |
| Chain M↔Chain N | M | ARG188 | N | GLU459 | 2.85 | Salt bridge (Electrostatic, Hydrogen bond) |
| Chain M↔Chain N | M | GLU195 | N | GLN443 | 2.97 | Hydrogen bond |
| Chain M↔Chain N | M | GLU195 | N | ARG448 | 3.49 | Salt bridge (Electrostatic, Hydrogen bond) |
| Chain M↔Chain N | M | ASN199 | N | TYR445 | 3.10 | Hydrogen bond |
| Chain M↔Chain N | M | TRP210 | N | TYR454 | 2.83 | Hydrogen bond (Hydrophobic, π–π stacking) |
| Chain M↔Chain N | M | GLN577 | N | GLN577 | 3.25 | Hydrogen bond |
| Chain M↔Chain N | M | LYS58 | N | ASN449 | 3.01 | Hydrogen bond |
| Chain M↔Chain N | M | CYS102 | N | THR383 | 3.16 | Hydrogen bond |
| Chain M↔Chain N | M | THR105 | N | GLU450 | 3.17 | Hydrogen bond |
| Chain M↔Chain N | M | TRP134 | N | PRO366 | 2.85 | Hydrogen bond |
| Chain M↔Chain N | M | VAL151 | N | GLU459 | 3.14 | Hydrogen bond |
| Chain M↔Chain N | M | SER166 | N | THR435 | 3.31 | Hydrogen bond |
| Chain M↔Chain N | M | GLY192 | N | ARG448 | 3.27 | Hydrogen bond |
| Chain M↔Chain N | M | SER202 | N | ASN449 | 3.43 | Hydrogen bond |
| Chain M↔Chain N | M | PRO295 | N | TYR454 | 2.74 | Hydrogen bond (Hydrophobic) |
| Chain M↔Chain N | M | TYR297 | N | TYR454 | 2.78 | Hydrogen bond (Hydrophobic, π–π stacking) |
| Chain M↔Chain N | M | ALA572 | N | ARG394 | 3.26 | Hydrogen bond |
| Chain M↔Chain N | M | LEU573 | N | ARG394 | 3.38 | Hydrogen bond |
| Chain M↔Chain N | M | THR575 | N | ARG394 | 2.96 | Hydrogen bond |
| Chain M↔Chain N | M | ASP123 | N | THR383 | 3.20 | Hydrogen bond |
| Chain M↔Chain N | M | PHE125 | N | PHE381 | 2.80 | Hydrogen bond (Hydrophobic) |
| Chain M↔Chain N | M | TYR127 | N | ILE379 | 2.86 | Hydrogen bond (Hydrophobic) |
| Chain M↔Chain N | M | PHE129 | N | CYS377 | 2.69 | Hydrogen bond |
| Chain M↔Chain N | M | GLU128 | N | ARG378 | 5.59 | Electrostatic |
| Chain M↔Chain N | M | ASP145 | N | LYS385 | 5.47 | Electrostatic |
| Chain M↔Chain N | M | LEU59 | N | TYR454 |  | Hydrophobic |
| Chain M↔Chain N | M | LEU59 | N | PRO453 |  | Hydrophobic |
| Chain M↔Chain N | M | TRP60 | N | TYR454 |  | Hydrophobic |
| Chain M↔Chain N | M | MET100 | N | PHE381 |  | Hydrophobic |
| Chain M↔Chain N | M | PHE106 | N | TYR454 |  | Hydrophobic |
| Chain M↔Chain N | M | PHE106 | N | PRO456 |  | Hydrophobic |
| Chain M↔Chain N | M | TYR121 | N | PRO456 |  | Hydrophobic |
| Chain M↔Chain N | M | PHE129 | N | PRO366 |  | Hydrophobic |
| Chain M↔Chain N | M | TRP134 | N | ILE379 |  | Hydrophobic |
| Chain M↔Chain N | M | TRP134 | N | PRO368 |  | Hydrophobic |
| Chain M↔Chain N | M | TRP134 | N | ALA365 |  | Hydrophobic |
| Chain M↔Chain N | M | ILE146 | N | PRO456 |  | Hydrophobic |
| Chain M↔Chain N | M | TYR149 | N | ILE458 |  | Hydrophobic |
| Chain M↔Chain N | M | TYR149 | N | VAL460 |  | Hydrophobic |
| Chain M↔Chain N | M | ILE150 | N | ILE458 |  | Hydrophobic |
| Chain M↔Chain N | M | VAL151 | N | PHE461 |  | Hydrophobic |
| Chain M↔Chain N | M | TRP153 | N | ILE390 |  | Hydrophobic |
| Chain M↔Chain N | M | TRP153 | N | LEU441 |  | Hydrophobic |
| Chain M↔Chain N | M | LEU160 | N | ILE390 |  | Hydrophobic |
| Chain M↔Chain N | M | LEU160 | N | LEU441 |  | Hydrophobic |
| Chain M↔Chain N | M | LEU160 | N | PHE439 |  | Hydrophobic |
| Chain M↔Chain N | M | LEU189 | N | ILE458 |  | Hydrophobic |
| Chain M↔Chain N | M | PHE196 | N | TYR445 |  | Hydrophobic |
| Chain M↔Chain N | M | MET207 | N | PRO453 |  | Hydrophobic |
| Chain M↔Chain N | M | TRP210 | N | PRO453 |  | Hydrophobic |
| Chain M↔Chain N | M | PRO228 | N | TYR454 |  | Hydrophobic |
| Chain M↔Chain N | M | MET250 | N | PHE461 |  | Hydrophobic |
| Chain M↔Chain N | M | MET250 | N | ILE390 |  | Hydrophobic |
| Chain M↔Chain N | M | MET250 | N | PHE439 |  | Hydrophobic |
| Chain M↔Chain N | M | PRO396 | N | MET432 |  | Hydrophobic |
| Chain M↔Chain N | M | LEU399 | N | LEU402 |  | Hydrophobic |
| Chain M↔Chain N | M | MET403 | N | MET410 |  | Hydrophobic |
| Chain M↔Chain N | M | MET403 | N | MET403 |  | Hydrophobic |
| Chain M↔Chain N | M | PHE407 | N | ILE411 |  | Hydrophobic |
| Chain M↔Chain N | M | PHE407 | N | LEU414 |  | Hydrophobic |
| Chain M↔Chain N | M | PHE407 | N | MET410 |  | Hydrophobic |
| Chain M↔Chain N | M | ILE411 | N | LEU414 |  | Hydrophobic |
| Chain M↔Chain N | M | LEU555 | N | PRO554 |  | Hydrophobic |
| Chain M↔Chain N | M | LEU555 | N | LEU555 |  | Hydrophobic |
| Chain M↔Chain N | M | MET562 | N | MET562 |  | Hydrophobic |
| Chain M↔Chain N | M | LEU566 | N | ILE565 |  | Hydrophobic |
| Chain M↔Chain N | M | ILE569 | N | ILE565 |  | Hydrophobic |
| Chain M↔Chain N | M | ILE569 | N | ILE569 |  | Hydrophobic |
| Chain M↔Chain N | M | LEU573 | N | ALA463 |  | Hydrophobic |
| Chain M↔Chain N | M | LEU573 | N | ALA465 |  | Hydrophobic |
| Chain M↔Chain N | M | LEU574 | N | LEU437 |  | Hydrophobic |
| Chain M↔Chain N | M | LEU574 | N | PHE461 |  | Hydrophobic |
| Chain M↔Chain N | M | PHE106 | N | HIS455 | 5.77 | π–π stacking |
| Chain M↔Chain N | M | TYR121 | N | HIS455 | 5.78 | π–π stacking |
| Chain M↔Chain N | M | HIS558 | N | HIS558 | 5.93 | π–π stacking |
| Chain M↔Chain N | M | TYR149 | N | LYS385 | 6.00 | Cation–π |

**Supplementary Tables 4d**

**gp60 (BppU) chain b /gp49 (TTP)/gp58(DTP)/gp59 (BHP)/gp61 (CFP) (inter complex interactions**

| **Interface** | **Chain1** | **gp58** | **Chain2** | **gp60** | **Disatnce (Å)** | **Bond type** |
| --- | --- | --- | --- | --- | --- | --- |
| Chain G↔Chain b | G | ARG35 | b | ASP12 | 2.91 | Salt bridge (Electrostatic, Hydrogen bond) |
| Chain G↔Chain b | G | LYS37 | b | ASP12 | 3.43 | Salt bridge (Electrostatic, Hydrogen bond) |
| Chain G↔Chain b | G | THR455 | b | ARG94 | 3.00 | Hydrogen bond |
| Chain G↔Chain b | G | SER557 | b | GLU90 | 3.34 | Hydrogen bond |
| Chain G↔Chain b | G | ARG425 | b | GLU90 | 4.58 | Electrostatic |
| Chain G↔Chain b | G | VAL13 | b | LEU28 |  | Hydrophobic |
| Chain G↔Chain b | G | VAL13 | b | PRO32 |  | Hydrophobic |
| Chain G↔Chain b | G | LEU234 | b | ALA42 |  | Hydrophobic |
| Chain G↔Chain b | G | LEU234 | b | PRO43 |  | Hydrophobic |
| Chain G↔Chain b | G | ILE237 | b | LEU47 |  | Hydrophobic |
| Chain G↔Chain b | G | ILE237 | b | PRO43 |  | Hydrophobic |
| Chain G↔Chain b | G | PHE238 | b | LEU47 |  | Hydrophobic |
| Chain G↔Chain b | G | PHE238 | b | PRO43 |  | Hydrophobic |
| Chain G↔Chain b | G | TRP284 | b | PHE37 | 6.91 | Hydrophobic (π–π stacking) |
| Chain G↔Chain b | G | ILE336 | b | TRP30 |  | Hydrophobic |
| Chain G↔Chain b | G | TRP284 | b | ARG25 | 4.56 | Cation–π |
| Chain G↔Chain c | G | GLY147 | c | ASN35 | 2.76 | Hydrogen bond |
| Chain G↔Chain c | G | ILE25 | c | ALA41 |  | Hydrophobic |
| Chain G↔Chain c | G | ILE25 | c | PRO43 |  | Hydrophobic |
| Chain G↔Chain c | G | ALA30 | c | ALA41 |  | Hydrophobic |
| Chain G↔Chain c | G | PHE33 | c | ALA39 |  | Hydrophobic |
| Chain G↔Chain c | G | PHE33 | c | ALA41 |  | Hydrophobic |
| Chain G↔Chain c | G | LEU34 | c | LEU47 |  | Hydrophobic |
| Chain G↔Chain c | G | LEU34 | c | ALA39 |  | Hydrophobic |
| Chain G↔Chain c | G | LEU34 | c | ALA41 |  | Hydrophobic |
| Chain G↔Chain c | G | PHE143 | c | PHE37 | 5.59 | Hydrophobic (π–π stacking) |
| Chain G↔Chain c | G | TRP284 | c | ILE11 |  | Hydrophobic |
| Chain G↔Chain c | G | PHE315 | c | ILE11 |  | Hydrophobic |
| Chain G↔Chain c | G | PHE315 | c | LYS14 | 4.51 | Cation–π |
| Chain G↔Chain d | G | ARG19 | d | ASP31 | 2.93 | Salt bridge (Electrostatic, Hydrogen bond) |
| Chain G↔Chain d | G | ARG19 | d | SER33 | 3.15 | Hydrogen bond |
| Chain G↔Chain d | G | ARG44 | d | ASP29 | 3.12 | Salt bridge (Electrostatic, Hydrogen bond) |
| Chain G↔Chain d | G | SER141 | d | ASP29 | 3.33 | Hydrogen bond |
| Chain G↔Chain d | G | ARG150 | d | ASP29 | 3.22 | Salt bridge (Electrostatic, Hydrogen bond) |
| Chain G↔Chain d | G | GLN364 | d | ASN49 | 3.24 | Hydrogen bond |
| Chain G↔Chain d | G | ASN15 | d | LEU28 | 3.32 | Hydrogen bond |
| Chain G↔Chain d | G | ARG230 | d | THR4 | 3.37 | Hydrogen bond |
| Chain G↔Chain d | G | ARG425 | d | LEU47 | 3.04 | Hydrogen bond |
| Chain G↔Chain d | G | ILE25 | d | SER34 | 3.19 | Hydrogen bond |
| Chain G↔Chain d | G | PRO282 | d | VAL10 | 3.49 | Hydrogen bond |
| Chain G↔Chain d | G | VAL13 | d | TRP30 |  | Hydrophobic |
| Chain G↔Chain d | G | ILE25 | d | MET36 |  | Hydrophobic |
| Chain G↔Chain d | G | PHE33 | d | ILE38 |  | Hydrophobic |
| Chain G↔Chain d | G | MET58 | d | MET36 |  | Hydrophobic |
| Chain G↔Chain d | G | PHE143 | d | VAL40 |  | Hydrophobic |
| Chain G↔Chain d | G | PHE143 | d | ILE38 |  | Hydrophobic |
| Chain G↔Chain d | G | TYR189 | d | ALA42 |  | Hydrophobic |
| Chain G↔Chain d | G | TYR189 | d | PRO43 |  | Hydrophobic |
| Chain G↔Chain d | G | TYR189 | d | VAL40 |  | Hydrophobic |
| Chain G↔Chain d | G | LEU234 | d | VAL8 |  | Hydrophobic |
| Chain G↔Chain d | G | PHE238 | d | VAL54 |  | Hydrophobic |
| Chain G↔Chain d | G | PHE238 | d | LEU17 |  | Hydrophobic |
| Chain G↔Chain d | G | TRP284 | d | ILE11 |  | Hydrophobic |
| Chain G↔Chain d | G | VAL427 | d | LEU47 |  | Hydrophobic |
| Chain G↔Chain d | G | VAL429 | d | PRO43 |  | Hydrophobic |
| Chain G↔Chain d | G | PRO555 | d | LEU47 |  | Hydrophobic |
| Chain G↔Chain d | G | PRO577 | d | PRO43 |  | Hydrophobic |

**Supplementary 4d**

**gp60 (BppU) chain b interactions (Intra)**

| **Interface** | **Chain1** | **gp60** | **Chain2** | **gp60** | **Disatnce (Å)** | **Bond type** |
| --- | --- | --- | --- | --- | --- | --- |
| Chain b↔Chain c | b | ASP57 | c | ARG55 | 2.86 | Salt bridge (Electrostatic, Hydrogen bond) |
| Chain b↔Chain c | b | SER84 | c | SER66 | 2.97 | Hydrogen bond |
| Chain b↔Chain c | b | ASN91 | c | THR61 | 3.16 | Hydrogen bond |
| Chain b↔Chain c | b | ARG178 | c | ASP146 | 3.01 | Salt bridge (Electrostatic, Hydrogen bond) |
| Chain b↔Chain c | b | ASP29 | c | GLN15 | 3.04 | Hydrogen bond |
| Chain b↔Chain c | b | ASP57 | c | ASN58 | 3.34 | Hydrogen bond |
| Chain b↔Chain c | b | GLU60 | c | THR61 | 3.19 | Hydrogen bond |
| Chain b↔Chain c | b | TRP85 | c | SER66 | 2.88 | Hydrogen bond |
| Chain b↔Chain c | b | TYR93 | c | LEU64 | 3.29 | Hydrogen bond (Hydrophobic) |
| Chain b↔Chain c | b | ASP117 | c | LEU112 | 3.05 | Hydrogen bond |
| Chain b↔Chain c | b | ARG213 | c | TRP184 | 2.91 | Hydrogen bond (Cation–π) |
| Chain b↔Chain c | b | ARG215 | c | SER270 | 2.85 | Hydrogen bond |
| Chain b↔Chain c | b | ALA231 | c | SER275 | 3.00 | Hydrogen bond |
| Chain b↔Chain c | b | ALA231 | c | HIS273 | 3.42 | Hydrogen bond |
| Chain b↔Chain c | b | GLY232 | c | HIS273 | 3.05 | Hydrogen bond |
| Chain b↔Chain c | b | SER237 | c | TRP149 | 2.93 | Hydrogen bond |
| Chain b↔Chain c | b | GLN15 | c | LEU28 | 2.92 | Hydrogen bond |
| Chain b↔Chain c | b | LEU17 | c | ILE26 | 2.69 | Hydrogen bond (Hydrophobic) |
| Chain b↔Chain c | b | ILE19 | c | PHE24 | 2.90 | Hydrogen bond |
| Chain b↔Chain c | b | ILE19 | c | GLN23 | 3.44 | Hydrogen bond |
| Chain b↔Chain c | b | GLU20 | c | GLN23 | 3.00 | Hydrogen bond |
| Chain b↔Chain c | b | ALA22 | c | VAL21 | 2.77 | Hydrogen bond |
| Chain b↔Chain c | b | PHE24 | c | ILE19 | 2.84 | Hydrogen bond (Hydrophobic) |
| Chain b↔Chain c | b | ILE26 | c | LEU17 | 2.82 | Hydrogen bond (Hydrophobic) |
| Chain b↔Chain c | b | LEU28 | c | GLN15 | 2.94 | Hydrogen bond |
| Chain b↔Chain c | b | ARG55 | c | GLY56 | 2.77 | Hydrogen bond |
| Chain b↔Chain c | b | ASP57 | c | GLY59 | 3.25 | Hydrogen bond |
| Chain b↔Chain c | b | ALA103 | c | GLY105 | 2.85 | Hydrogen bond |
| Chain b↔Chain c | b | ILE128 | c | ILE128 | 3.30 | Hydrogen bond (Hydrophobic) |
| Chain b↔Chain c | b | VAL130 | c | LYS126 | 2.85 | Hydrogen bond |
| Chain b↔Chain c | b | VAL130 | c | GLY125 | 3.02 | Hydrogen bond |
| Chain b↔Chain c | b | VAL218 | c | GLU223 | 3.08 | Hydrogen bond |
| Chain b↔Chain c | b | GLY236 | c | PRO150 | 3.15 | Hydrogen bond |
| Chain b↔Chain c | b | GLY236 | c | ALA151 | 3.39 | Hydrogen bond |
| Chain b↔Chain c | b | GLU180 | c | ARG277 | 3.91 | Salt bridge (Electrostatic) |
| Chain b↔Chain c | b | TRP6 | c | LEU53 |  | Hydrophobic |
| Chain b↔Chain c | b | VAL8 | c | LEU28 |  | Hydrophobic |
| Chain b↔Chain c | b | TYR16 | c | PRO27 |  | Hydrophobic |
| Chain b↔Chain c | b | TYR16 | c | LEU47 |  | Hydrophobic |
| Chain b↔Chain c | b | LEU17 | c | LEU53 |  | Hydrophobic |
| Chain b↔Chain c | b | LEU17 | c | ALA52 |  | Hydrophobic |
| Chain b↔Chain c | b | LEU17 | c | LEU28 |  | Hydrophobic |
| Chain b↔Chain c | b | ILE19 | c | ILE26 |  | Hydrophobic |
| Chain b↔Chain c | b | ALA22 | c | PHE24 |  | Hydrophobic |
| Chain b↔Chain c | b | PHE24 | c | ILE38 |  | Hydrophobic |
| Chain b↔Chain c | b | PHE24 | c | PHE24 |  | Hydrophobic |
| Chain b↔Chain c | b | PHE24 | c | VAL40 |  | Hydrophobic |
| Chain b↔Chain c | b | PHE24 | c | VAL21 |  | Hydrophobic |
| Chain b↔Chain c | b | ILE26 | c | ILE19 |  | Hydrophobic |
| Chain b↔Chain c | b | PRO27 | c | TYR16 |  | Hydrophobic |
| Chain b↔Chain c | b | LEU28 | c | VAL8 |  | Hydrophobic |
| Chain b↔Chain c | b | LEU28 | c | LEU17 |  | Hydrophobic |
| Chain b↔Chain c | b | TRP30 | c | TYR16 | 5.30 | Hydrophobic (π–π stacking) |
| Chain b↔Chain c | b | PHE50 | c | LEU53 |  | Hydrophobic |
| Chain b↔Chain c | b | PHE50 | c | LEU28 |  | Hydrophobic |
| Chain b↔Chain c | b | LEU53 | c | LEU53 |  | Hydrophobic |
| Chain b↔Chain c | b | PRO62 | c | LEU64 |  | Hydrophobic |
| Chain b↔Chain c | b | PRO62 | c | PRO62 |  | Hydrophobic |
| Chain b↔Chain c | b | LEU64 | c | LEU64 |  | Hydrophobic |
| Chain b↔Chain c | b | ALA83 | c | ILE68 |  | Hydrophobic |
| Chain b↔Chain c | b | ALA83 | c | PHE70 |  | Hydrophobic |
| Chain b↔Chain c | b | TRP85 | c | ILE68 |  | Hydrophobic |
| Chain b↔Chain c | b | TRP85 | c | LEU95 |  | Hydrophobic |
| Chain b↔Chain c | b | TRP85 | c | LEU64 |  | Hydrophobic |
| Chain b↔Chain c | b | LEU95 | c | ILE68 |  | Hydrophobic |
| Chain b↔Chain c | b | LEU97 | c | LEU97 |  | Hydrophobic |
| Chain b↔Chain c | b | LEU97 | c | LEU99 |  | Hydrophobic |
| Chain b↔Chain c | b | LEU99 | c | PHE70 |  | Hydrophobic |
| Chain b↔Chain c | b | LEU99 | c | LEU99 |  | Hydrophobic |
| Chain b↔Chain c | b | LEU112 | c | LEU112 |  | Hydrophobic |
| Chain b↔Chain c | b | ALA115 | c | ILE110 |  | Hydrophobic |
| Chain b↔Chain c | b | ALA115 | c | LEU112 |  | Hydrophobic |
| Chain b↔Chain c | b | LEU127 | c | LEU127 |  | Hydrophobic |
| Chain b↔Chain c | b | ILE128 | c | LEU112 |  | Hydrophobic |
| Chain b↔Chain c | b | ALA129 | c | LEU127 |  | Hydrophobic |
| Chain b↔Chain c | b | VAL130 | c | LEU122 |  | Hydrophobic |
| Chain b↔Chain c | b | VAL130 | c | LEU139 |  | Hydrophobic |
| Chain b↔Chain c | b | PHE137 | c | ILE128 |  | Hydrophobic |
| Chain b↔Chain c | b | PHE137 | c | LEU112 |  | Hydrophobic |
| Chain b↔Chain c | b | PHE137 | c | ALA113 |  | Hydrophobic |
| Chain b↔Chain c | b | PHE137 | c | LEU118 |  | Hydrophobic |
| Chain b↔Chain c | b | PHE137 | c | LEU122 |  | Hydrophobic |
| Chain b↔Chain c | b | PHE137 | c | LEU139 |  | Hydrophobic |
| Chain b↔Chain c | b | VAL140 | c | LEU127 |  | Hydrophobic |
| Chain b↔Chain c | b | PHE225 | c | PHE225 |  | Hydrophobic |
| Chain b↔Chain c | b | ALA230 | c | TRP184 |  | Hydrophobic |
| Chain b↔Chain c | b | PRO233 | c | TRP149 |  | Hydrophobic |
| Chain b↔Chain c | b | PRO235 | c | PRO150 |  | Hydrophobic |
| Chain b↔Chain c | b | PRO235 | c | ILE153 |  | Hydrophobic |
| Chain b↔Chain c | b | PRO280 | c | VAL144 |  | Hydrophobic |
| Chain b↔Chain c | b | PRO282 | c | VAL144 |  | Hydrophobic |
| Chain b↔Chain c | b | TRP85 | c | TRP85 | 6.84 | π–π stacking |
| Chain b↔Chain c | b | ARG178 | c | TRP149 | 5.27 | Cation–π |
| Chain b↔Chain c | b | ARG215 | c | TRP184 | 5.41 | Cation–π |
| Chain b↔Chain d | b | GLU20 | d | LYS14 | 2.98 | Salt bridge (Electrostatic, Hydrogen bond) |
| Chain b↔Chain d | b | GLN23 | d | TYR16 | 3.06 | Hydrogen bond |
| Chain b↔Chain d | b | ARG25 | d | GLU20 | 3.03 | Salt bridge (Electrostatic, Hydrogen bond) |
| Chain b↔Chain d | b | ASP146 | d | ARG178 | 3.15 | Salt bridge (Electrostatic, Hydrogen bond) |
| Chain b↔Chain d | b | ARG277 | d | GLN279 | 2.98 | Hydrogen bond |
| Chain b↔Chain d | b | SER33 | d | ILE26 | 2.90 | Hydrogen bond |
| Chain b↔Chain d | b | SER33 | d | ARG25 | 3.46 | Hydrogen bond |
| Chain b↔Chain d | b | ARG55 | d | ASN58 | 2.91 | Hydrogen bond |
| Chain b↔Chain d | b | PRO62 | d | TRP85 | 3.15 | Hydrogen bond |
| Chain b↔Chain d | b | THR101 | d | ALA103 | 3.37 | Hydrogen bond |
| Chain b↔Chain d | b | LEU112 | d | ASP117 | 3.07 | Hydrogen bond |
| Chain b↔Chain d | b | TRP149 | d | SER237 | 2.96 | Hydrogen bond |
| Chain b↔Chain d | b | TRP184 | d | ARG213 | 2.84 | Hydrogen bond |
| Chain b↔Chain d | b | SER270 | d | ARG215 | 3.07 | Hydrogen bond |
| Chain b↔Chain d | b | HIS273 | d | ALA231 | 3.01 | Hydrogen bond |
| Chain b↔Chain d | b | SER275 | d | ALA231 | 2.83 | Hydrogen bond |
| Chain b↔Chain d | b | MET36 | d | VAL21 | 3.45 | Hydrogen bond |
| Chain b↔Chain d | b | ILE38 | d | ILE19 | 3.06 | Hydrogen bond (Hydrophobic) |
| Chain b↔Chain d | b | VAL40 | d | LEU17 | 2.83 | Hydrogen bond (Hydrophobic) |
| Chain b↔Chain d | b | ALA42 | d | GLN15 | 3.36 | Hydrogen bond |
| Chain b↔Chain d | b | GLY59 | d | GLU60 | 3.14 | Hydrogen bond |
| Chain b↔Chain d | b | GLY102 | d | ALA103 | 2.86 | Hydrogen bond |
| Chain b↔Chain d | b | GLY105 | d | ASP106 | 3.14 | Hydrogen bond |
| Chain b↔Chain d | b | ILE110 | d | GLU116 | 3.08 | Hydrogen bond |
| Chain b↔Chain d | b | GLY125 | d | VAL130 | 2.92 | Hydrogen bond |
| Chain b↔Chain d | b | LYS126 | d | VAL130 | 3.03 | Hydrogen bond |
| Chain b↔Chain d | b | ILE128 | d | ILE128 | 3.27 | Hydrogen bond (Hydrophobic) |
| Chain b↔Chain d | b | PRO150 | d | GLY236 | 3.15 | Hydrogen bond |
| Chain b↔Chain d | b | GLU223 | d | VAL218 | 2.87 | Hydrogen bond |
| Chain b↔Chain d | b | ARG55 | d | GLU60 | 3.94 | Salt bridge (Electrostatic) |
| Chain b↔Chain d | b | ASP31 | d | ARG25 | 5.15 | Electrostatic |
| Chain b↔Chain d | b | TRP6 | d | VAL54 |  | Hydrophobic |
| Chain b↔Chain d | b | TRP6 | d | LEU17 |  | Hydrophobic |
| Chain b↔Chain d | b | TRP6 | d | LEU53 |  | Hydrophobic |
| Chain b↔Chain d | b | LEU17 | d | LEU53 |  | Hydrophobic |
| Chain b↔Chain d | b | ILE19 | d | LEU53 |  | Hydrophobic |
| Chain b↔Chain d | b | VAL21 | d | TYR16 |  | Hydrophobic |
| Chain b↔Chain d | b | ILE26 | d | ILE26 |  | Hydrophobic |
| Chain b↔Chain d | b | ILE26 | d | PHE37 |  | Hydrophobic |
| Chain b↔Chain d | b | ILE26 | d | TRP30 |  | Hydrophobic |
| Chain b↔Chain d | b | LEU28 | d | TRP30 |  | Hydrophobic |
| Chain b↔Chain d | b | PRO32 | d | ILE26 |  | Hydrophobic |
| Chain b↔Chain d | b | MET36 | d | PHE24 |  | Hydrophobic |
| Chain b↔Chain d | b | MET36 | d | ALA39 |  | Hydrophobic |
| Chain b↔Chain d | b | MET36 | d | PHE37 |  | Hydrophobic |
| Chain b↔Chain d | b | PHE37 | d | ILE11 |  | Hydrophobic |
| Chain b↔Chain d | b | PHE37 | d | VAL18 |  | Hydrophobic |
| Chain b↔Chain d | b | ILE38 | d | TRP6 |  | Hydrophobic |
| Chain b↔Chain d | b | ILE38 | d | PHE24 |  | Hydrophobic |
| Chain b↔Chain d | b | ALA39 | d | ILE11 |  | Hydrophobic |
| Chain b↔Chain d | b | ALA39 | d | TYR16 |  | Hydrophobic |
| Chain b↔Chain d | b | ALA39 | d | VAL18 |  | Hydrophobic |
| Chain b↔Chain d | b | VAL40 | d | TRP6 |  | Hydrophobic |
| Chain b↔Chain d | b | VAL40 | d | LEU53 |  | Hydrophobic |
| Chain b↔Chain d | b | PRO43 | d | LEU17 |  | Hydrophobic |
| Chain b↔Chain d | b | LEU47 | d | VAL54 |  | Hydrophobic |
| Chain b↔Chain d | b | LEU53 | d | VAL54 |  | Hydrophobic |
| Chain b↔Chain d | b | LEU64 | d | ALA83 |  | Hydrophobic |
| Chain b↔Chain d | b | LEU64 | d | TRP85 |  | Hydrophobic |
| Chain b↔Chain d | b | LEU64 | d | LEU95 |  | Hydrophobic |
| Chain b↔Chain d | b | LEU97 | d | LEU99 |  | Hydrophobic |
| Chain b↔Chain d | b | ILE110 | d | ALA115 |  | Hydrophobic |
| Chain b↔Chain d | b | ILE110 | d | ILE110 |  | Hydrophobic |
| Chain b↔Chain d | b | LEU112 | d | ALA115 |  | Hydrophobic |
| Chain b↔Chain d | b | LEU112 | d | LEU118 |  | Hydrophobic |
| Chain b↔Chain d | b | LEU112 | d | PHE137 |  | Hydrophobic |
| Chain b↔Chain d | b | LEU112 | d | ILE128 |  | Hydrophobic |
| Chain b↔Chain d | b | LEU112 | d | LEU112 |  | Hydrophobic |
| Chain b↔Chain d | b | ALA113 | d | PHE137 |  | Hydrophobic |
| Chain b↔Chain d | b | LEU118 | d | PHE137 |  | Hydrophobic |
| Chain b↔Chain d | b | LEU122 | d | PHE137 |  | Hydrophobic |
| Chain b↔Chain d | b | LEU122 | d | VAL130 |  | Hydrophobic |
| Chain b↔Chain d | b | ALA124 | d | ALA134 |  | Hydrophobic |
| Chain b↔Chain d | b | LEU127 | d | LEU127 |  | Hydrophobic |
| Chain b↔Chain d | b | LEU127 | d | VAL140 |  | Hydrophobic |
| Chain b↔Chain d | b | LEU127 | d | ALA129 |  | Hydrophobic |
| Chain b↔Chain d | b | ILE128 | d | PHE137 |  | Hydrophobic |
| Chain b↔Chain d | b | LEU139 | d | PHE137 |  | Hydrophobic |
| Chain b↔Chain d | b | LEU139 | d | VAL130 |  | Hydrophobic |
| Chain b↔Chain d | b | VAL144 | d | PRO282 |  | Hydrophobic |
| Chain b↔Chain d | b | VAL144 | d | PRO280 |  | Hydrophobic |
| Chain b↔Chain d | b | TRP149 | d | PRO233 |  | Hydrophobic |
| Chain b↔Chain d | b | ILE153 | d | PRO235 |  | Hydrophobic |
| Chain b↔Chain d | b | TRP184 | d | ALA230 |  | Hydrophobic |
| Chain b↔Chain d | b | PHE225 | d | PHE225 |  | Hydrophobic |
| Chain b↔Chain d | b | TRP149 | d | ARG178 | 5.30 | Cation–π |
| Chain b↔Chain d | b | TRP184 | d | ARG215 | 5.02 | Cation–π |
| Chain c↔Chain d | c | ASP57 | d | ARG55 | 3.29 | Salt bridge (Electrostatic, Hydrogen bond) |
| Chain c↔Chain d | c | ASN91 | d | THR61 | 2.75 | Hydrogen bond |
| Chain c↔Chain d | c | TYR93 | d | GLU63 | 2.81 | Hydrogen bond |
| Chain c↔Chain d | c | ASP117 | d | ASN111 | 3.49 | Hydrogen bond |
| Chain c↔Chain d | c | ARG178 | d | ASP146 | 2.91 | Salt bridge (Electrostatic, Hydrogen bond) |
| Chain c↔Chain d | c | GLU180 | d | ARG277 | 3.34 | Salt bridge (Electrostatic, Hydrogen bond) |
| Chain c↔Chain d | c | GLN279 | d | ARG277 | 3.47 | Hydrogen bond |
| Chain c↔Chain d | c | TRP6 | d | PRO32 | 3.29 | Hydrogen bond |
| Chain c↔Chain d | c | ASN35 | d | ALA41 | 3.25 | Hydrogen bond |
| Chain c↔Chain d | c | GLU60 | d | THR61 | 2.92 | Hydrogen bond |
| Chain c↔Chain d | c | TRP85 | d | SER66 | 2.85 | Hydrogen bond |
| Chain c↔Chain d | c | TYR93 | d | LEU64 | 2.96 | Hydrogen bond (Hydrophobic) |
| Chain c↔Chain d | c | GLU116 | d | ILE110 | 3.21 | Hydrogen bond |
| Chain c↔Chain d | c | ASP117 | d | LEU112 | 2.91 | Hydrogen bond |
| Chain c↔Chain d | c | ASP117 | d | ALA113 | 3.13 | Hydrogen bond |
| Chain c↔Chain d | c | ARG213 | d | TRP184 | 2.93 | Hydrogen bond |
| Chain c↔Chain d | c | ARG215 | d | SER270 | 2.87 | Hydrogen bond |
| Chain c↔Chain d | c | GLY232 | d | HIS273 | 2.91 | Hydrogen bond |
| Chain c↔Chain d | c | SER237 | d | TRP149 | 3.09 | Hydrogen bond |
| Chain c↔Chain d | c | PRO32 | d | GLY46 | 3.29 | Hydrogen bond |
| Chain c↔Chain d | c | MET36 | d | ALA41 | 2.92 | Hydrogen bond (Hydrophobic) |
| Chain c↔Chain d | c | ILE38 | d | ALA39 | 2.88 | Hydrogen bond (Hydrophobic) |
| Chain c↔Chain d | c | VAL40 | d | PHE37 | 3.02 | Hydrogen bond (Hydrophobic) |
| Chain c↔Chain d | c | ALA42 | d | ASN35 | 2.88 | Hydrogen bond |
| Chain c↔Chain d | c | PRO51 | d | LEU53 | 3.03 | Hydrogen bond |
| Chain c↔Chain d | c | LEU53 | d | VAL54 | 3.12 | Hydrogen bond (Hydrophobic) |
| Chain c↔Chain d | c | VAL54 | d | VAL54 | 2.91 | Hydrogen bond |
| Chain c↔Chain d | c | VAL54 | d | GLY56 | 3.39 | Hydrogen bond |
| Chain c↔Chain d | c | ASP57 | d | GLY59 | 2.89 | Hydrogen bond |
| Chain c↔Chain d | c | HIS100 | d | GLY102 | 3.25 | Hydrogen bond |
| Chain c↔Chain d | c | ALA103 | d | GLY105 | 3.10 | Hydrogen bond |
| Chain c↔Chain d | c | ILE128 | d | ILE128 | 3.41 | Hydrogen bond (Hydrophobic) |
| Chain c↔Chain d | c | VAL130 | d | LYS126 | 2.88 | Hydrogen bond |
| Chain c↔Chain d | c | VAL130 | d | GLY125 | 2.95 | Hydrogen bond |
| Chain c↔Chain d | c | VAL218 | d | GLU223 | 3.00 | Hydrogen bond |
| Chain c↔Chain d | c | GLY236 | d | ALA151 | 2.99 | Hydrogen bond |
| Chain c↔Chain d | c | GLY236 | d | PRO150 | 3.33 | Hydrogen bond |
| Chain c↔Chain d | c | TRP6 | d | PHE37 |  | Hydrophobic |
| Chain c↔Chain d | c | LEU17 | d | TRP30 |  | Hydrophobic |
| Chain c↔Chain d | c | ILE19 | d | PHE37 |  | Hydrophobic |
| Chain c↔Chain d | c | ILE26 | d | LEU53 |  | Hydrophobic |
| Chain c↔Chain d | c | MET36 | d | PHE50 |  | Hydrophobic |
| Chain c↔Chain d | c | MET36 | d | PHE24 |  | Hydrophobic |
| Chain c↔Chain d | c | PHE37 | d | VAL40 |  | Hydrophobic |
| Chain c↔Chain d | c | ILE38 | d | PHE24 |  | Hydrophobic |
| Chain c↔Chain d | c | ILE38 | d | PHE37 |  | Hydrophobic |
| Chain c↔Chain d | c | ALA39 | d | ILE38 |  | Hydrophobic |
| Chain c↔Chain d | c | PHE50 | d | PHE50 |  | Hydrophobic |
| Chain c↔Chain d | c | PHE50 | d | TRP6 |  | Hydrophobic |
| Chain c↔Chain d | c | PHE50 | d | LEU53 |  | Hydrophobic |
| Chain c↔Chain d | c | PRO51 | d | PHE50 |  | Hydrophobic |
| Chain c↔Chain d | c | PRO51 | d | ALA52 |  | Hydrophobic |
| Chain c↔Chain d | c | ALA52 | d | LEU53 |  | Hydrophobic |
| Chain c↔Chain d | c | VAL54 | d | ALA52 |  | Hydrophobic |
| Chain c↔Chain d | c | PRO62 | d | LEU64 |  | Hydrophobic |
| Chain c↔Chain d | c | PRO62 | d | PRO62 |  | Hydrophobic |
| Chain c↔Chain d | c | LEU64 | d | LEU64 |  | Hydrophobic |
| Chain c↔Chain d | c | ALA83 | d | ILE68 |  | Hydrophobic |
| Chain c↔Chain d | c | ALA83 | d | PHE70 |  | Hydrophobic |
| Chain c↔Chain d | c | ALA83 | d | LEU97 |  | Hydrophobic |
| Chain c↔Chain d | c | TRP85 | d | ILE68 |  | Hydrophobic |
| Chain c↔Chain d | c | TRP85 | d | TRP85 | 6.30 | Hydrophobic (π–π stacking) |
| Chain c↔Chain d | c | TRP85 | d | LEU95 |  | Hydrophobic |
| Chain c↔Chain d | c | LEU97 | d | PHE70 |  | Hydrophobic |
| Chain c↔Chain d | c | LEU97 | d | LEU99 |  | Hydrophobic |
| Chain c↔Chain d | c | LEU97 | d | LEU97 |  | Hydrophobic |
| Chain c↔Chain d | c | LEU99 | d | LEU99 |  | Hydrophobic |
| Chain c↔Chain d | c | ILE110 | d | ILE110 |  | Hydrophobic |
| Chain c↔Chain d | c | LEU112 | d | LEU112 |  | Hydrophobic |
| Chain c↔Chain d | c | ALA115 | d | ILE110 |  | Hydrophobic |
| Chain c↔Chain d | c | ALA115 | d | LEU112 |  | Hydrophobic |
| Chain c↔Chain d | c | LEU127 | d | LEU127 |  | Hydrophobic |
| Chain c↔Chain d | c | ILE128 | d | LEU112 |  | Hydrophobic |
| Chain c↔Chain d | c | ALA129 | d | LEU127 |  | Hydrophobic |
| Chain c↔Chain d | c | VAL130 | d | LEU122 |  | Hydrophobic |
| Chain c↔Chain d | c | VAL130 | d | LEU139 |  | Hydrophobic |
| Chain c↔Chain d | c | PHE137 | d | LEU118 |  | Hydrophobic |
| Chain c↔Chain d | c | PHE137 | d | ALA113 |  | Hydrophobic |
| Chain c↔Chain d | c | PHE137 | d | LEU122 |  | Hydrophobic |
| Chain c↔Chain d | c | PHE137 | d | ILE128 |  | Hydrophobic |
| Chain c↔Chain d | c | PHE137 | d | LEU139 |  | Hydrophobic |
| Chain c↔Chain d | c | PHE137 | d | LEU112 |  | Hydrophobic |
| Chain c↔Chain d | c | VAL140 | d | LEU127 |  | Hydrophobic |
| Chain c↔Chain d | c | PHE225 | d | PHE225 | 4.61 | Hydrophobic (π–π stacking) |
| Chain c↔Chain d | c | ALA230 | d | TRP184 |  | Hydrophobic |
| Chain c↔Chain d | c | ALA231 | d | MET147 |  | Hydrophobic |
| Chain c↔Chain d | c | PRO233 | d | TRP149 |  | Hydrophobic |
| Chain c↔Chain d | c | PRO235 | d | ILE153 |  | Hydrophobic |
| Chain c↔Chain d | c | PRO280 | d | VAL144 |  | Hydrophobic |
| Chain c↔Chain d | c | PRO282 | d | VAL144 |  | Hydrophobic |
| Chain c↔Chain d | c | ARG178 | d | TRP149 | 5.46 | Cation–π |
| Chain c↔Chain d | c | ARG215 | d | TRP184 | 5.02 | Cation–π |

**Supplementary 4e**

**gp61 (CFP) chain P /gp59 (BHP) (inter complex interactions)**

| **Interface** | **Chain1** | **gp59** | **Chain2** | **gp61** | **Disatnce (Å)** | **Bond type** |
| --- | --- | --- | --- | --- | --- | --- |
| Chain M↔Chain P | M | LYS397 | P | GLU29 | 2.68 | Salt bridge (Electrostatic, Hydrogen bond) |
| Chain M↔Chain P | M | ASP412 | P | GLN42 | 2.85 | Hydrogen bond |
| Chain M↔Chain P | M | ASN470 | P | ASN25 | 2.79 | Hydrogen bond |
| Chain M↔Chain P | M | ILE169 | P | ARG20 | 3.02 | Hydrogen bond |
| Chain M↔Chain P | M | ARG233 | P | ASN14 | 3.04 | Hydrogen bond |
| Chain M↔Chain P | M | ARG233 | P | VAL12 | 3.05 | Hydrogen bond |
| Chain M↔Chain P | M | ARG233 | P | TRP11 | 3.20 | Hydrogen bond |
| Chain M↔Chain P | M | LYS397 | P | GLN27 | 2.98 | Hydrogen bond |
| Chain M↔Chain P | M | ASN400 | P | GLU29 | 3.12 | Hydrogen bond |
| Chain M↔Chain P | M | ASN404 | P | GLU29 | 3.38 | Hydrogen bond |
| Chain M↔Chain P | M | ILE416 | P | SER46 | 2.96 | Hydrogen bond |
| Chain M↔Chain P | M | PRO468 | P | ASN25 | 3.28 | Hydrogen bond |
| Chain M↔Chain P | M | ASP223 | P | ARG17 | 3.98 | Salt bridge (Electrostatic) |
| Chain M↔Chain P | M | GLU184 | P | ARG20 | 4.87 | Electrostatic |
| Chain M↔Chain P | M | TRP156 | P | VAL15 |  | Hydrophobic |
| Chain M↔Chain P | M | TRP157 | P | VAL19 |  | Hydrophobic |
| Chain M↔Chain P | M | PHE165 | P | VAL19 |  | Hydrophobic |
| Chain M↔Chain P | M | ILE169 | P | LEU22 |  | Hydrophobic |
| Chain M↔Chain P | M | ILE171 | P | LEU22 |  | Hydrophobic |
| Chain M↔Chain P | M | MET183 | P | VAL15 |  | Hydrophobic |
| Chain M↔Chain P | M | LEU187 | P | VAL15 |  | Hydrophobic |
| Chain M↔Chain P | M | PRO236 | P | TRP11 |  | Hydrophobic |
| Chain M↔Chain P | M | TRP283 | P | PRO9 |  | Hydrophobic |
| Chain M↔Chain P | M | TRP283 | P | TRP11 | 5.78 | Hydrophobic (π–π stacking) |
| Chain M↔Chain P | M | TRP283 | P | VAL12 |  | Hydrophobic |
| Chain M↔Chain P | M | PHE287 | P | ILE8 |  | Hydrophobic |
| Chain M↔Chain P | M | MET403 | P | TRP28 |  | Hydrophobic |
| Chain M↔Chain P | M | PHE407 | P | MET36 |  | Hydrophobic |
| Chain M↔Chain P | M | PHE407 | P | ILE31 |  | Hydrophobic |
| Chain M↔Chain P | M | PHE407 | P | LEU39 |  | Hydrophobic |
| Chain M↔Chain P | M | ILE411 | P | LEU39 |  | Hydrophobic |
| Chain M↔Chain P | M | LEU417 | P | PHE64 |  | Hydrophobic |
| Chain M↔Chain P | M | ILE418 | P | PRO61 |  | Hydrophobic |
| Chain M↔Chain P | M | ILE418 | P | PHE59 |  | Hydrophobic |
| Chain M↔Chain P | M | PHE420 | P | PHE64 | 5.29 | Hydrophobic (π–π stacking) |
| Chain M↔Chain P | M | LEU427 | P | MET35 |  | Hydrophobic |
| Chain M↔Chain P | M | TYR469 | P | LEU22 |  | Hydrophobic |
| Chain M↔Chain P | M | ILE471 | P | LEU22 |  | Hydrophobic |
| Chain M↔Chain P | M | TRP156 | P | ARG17 | 4.71 | Cation–π |
| Chain N↔Chain P | N | ALA413 | P | ARG40 | 2.92 | Hydrogen bond |
| Chain N↔Chain P | N | LEU402 | P | TRP28 |  | Hydrophobic |
| Chain N↔Chain P | N | TRP409 | P | TRP28 |  | Hydrophobic |
| Chain N↔Chain P | N | MET410 | P | ILE31 |  | Hydrophobic |
| Chain N↔Chain P | N | ALA413 | P | MET36 |  | Hydrophobic |
| Chain N↔Chain P | N | LEU414 | P | MET36 |  | Hydrophobic |
| Chain N↔Chain P | N | LEU414 | P | LEU39 |  | Hydrophobic |
| Chain N↔Chain P | N | LEU414 | P | LEU43 |  | Hydrophobic |
| Chain N↔Chain P | N | LEU428 | P | TRP28 |  | Hydrophobic |
| Chain N↔hain P | N | MET432 | P | TRP28 |  | Hydrophobic |

| **Interface** | **Chain1** | **gp61** | **Chain2** | **gp60** | **Disatnce (Å)** | **Bond type** |
| --- | --- | --- | --- | --- | --- | --- |
| Chain P↔Chain c | P | GLU34 | c | ARG258 | 2.72 | Salt bridge (Electrostatic, Hydrogen bond) |
| Chain P↔Chain c | P | GLN38 | c | ARG258 | 2.88 | Hydrogen bond |
| Chain P↔Chain c | P | GLN38 | c | SER262 | 3.47 | Hydrogen bond |
| Chain P↔Chain f | P | GLN18 | f | GLN248 | 2.75 | Hydrogen bond |
| Chain P↔Chain f | P | GLN27 | f | THR164 | 2.83 | Hydrogen bond |
| Chain P↔Chain f | P | GLU29 | f | TYR163 | 2.82 | Hydrogen bond |
| Chain P↔Chain f | P | GLU33 | f | THR264 | 2.94 | Hydrogen bond |
| Chain P↔Chain f | P | GLY30 | f | ASN160 | 2.87 | Hydrogen bond |
| Chain P↔Chain f | P | LYS21 | f | ASP203 | 4.97 | Electrostatic |
| Chain P↔Chain f | P | PRO23 | f | PRO169 |  | Hydrophobic |
| Chain P↔Chain f | P | PRO23 | f | ALA167 |  | Hydrophobic |
| Chain P↔Chain f | P | PRO23 | f | VAL251 |  | Hydrophobic |
| Chain P↔Chain f | P | PRO24 | f | TYR253 |  | Hydrophobic |

**Supplementary 4d**

**gp61(CFP) chain P interactions (Intra)**

| **Interface** | **Chain1** | **gp61** | **Chain2** | **gp61** | **Disatnce (Å)** | **Bond type** |
| --- | --- | --- | --- | --- | --- | --- |
| Chain P↔Chain Q | P | LEU94 | Q | THR90 | 2.86 | Hydrogen bond |
| Chain P↔Chain Q | P | SER95 | Q | THR90 | 3.16 | Hydrogen bond |
| Chain P↔Chain Q | P | LEU43 | Q | LEU43 |  | Hydrophobic |
| Chain P↔Chain Q | P | LEU44 | Q | ALA50 |  | Hydrophobic |
| Chain P↔Chain Q | P | LEU44 | Q | ILE47 |  | Hydrophobic |
| Chain P↔Chain Q | P | ILE47 | Q | ILE47 |  | Hydrophobic |
| Chain P↔Chain Q | P | LEU48 | Q | VAL51 |  | Hydrophobic |
| Chain P↔Chain Q | P | ALA68 | Q | ALA54 |  | Hydrophobic |
| Chain P↔Chain Q | P | LEU71 | Q | ALA54 |  | Hydrophobic |
| Chain P↔Chain Q | P | LEU71 | Q | ILE55 |  | Hydrophobic |
| Chain P↔Chain Q | P | LEU71 | Q | VAL51 |  | Hydrophobic |
| Chain P↔Chain Q | P | TRP74 | Q | TRP74 | 6.12 | Hydrophobic (π–π stacking) |
| Chain P↔Chain Q | P | ALA75 | Q | ILE55 |  | Hydrophobic |
| Chain P↔Chain Q | P | LEU78 | Q | ILE82 |  | Hydrophobic |
| Chain P↔Chain Q | P | LEU78 | Q | LEU78 |  | Hydrophobic |
| Chain P↔Chain Q | P | ILE82 | Q | ILE82 |  | Hydrophobic |
| Chain P↔Chain Q | P | ILE83 | Q | LEU89 |  | Hydrophobic |
| Chain P↔Chain Q | P | ILE83 | Q | ILE86 |  | Hydrophobic |
| Chain P↔Chain Q | P | LEU94 | Q | ILE92 |  | Hydrophobic |
| Chain P↔Chain Q | P | LEU94 | Q | LEU94 |  | Hydrophobic |
| Chain P↔Chain Q | P | LEU94 | Q | ILE86 |  | Hydrophobic |
| Chain P↔Chain Q | P | PHE100 | Q | PHE100 | 5.76 | Hydrophobic (π–π stacking) |
| Chain P↔Chain Q | P | PHE100 | Q | ILE92 |  | Hydrophobic |
| Chain P↔Chain R | P | THR90 | R | LEU94 | 3.13 | Hydrogen bond |
| Chain P↔Chain R | P | THR90 | R | SER95 | 3.36 | Hydrogen bond |
| Chain P↔Chain R | P | LEU43 | R | LEU43 |  | Hydrophobic |
| Chain P↔Chain R | P | ILE47 | R | ILE47 |  | Hydrophobic |
| Chain P↔Chain R | P | ILE47 | R | LEU44 |  | Hydrophobic |
| Chain P↔Chain R | P | ALA50 | R | LEU44 |  | Hydrophobic |
| Chain P↔Chain R | P | VAL51 | R | LEU71 |  | Hydrophobic |
| Chain P↔Chain R | P | VAL51 | R | LEU48 |  | Hydrophobic |
| Chain P↔Chain R | P | ALA54 | R | LEU71 |  | Hydrophobic |
| Chain P↔Chain R | P | ALA54 | R | ALA68 |  | Hydrophobic |
| Chain P↔Chain R | P | ILE55 | R | LEU71 |  | Hydrophobic |
| Chain P↔Chain R | P | ILE55 | R | ALA75 |  | Hydrophobic |
| Chain P↔Chain R | P | TRP74 | R | LEU78 |  | Hydrophobic |
| Chain P↔Chain R | P | TRP74 | R | TRP74 | 6.05 | Hydrophobic (π–π stacking) |
| Chain P↔Chain R | P | LEU78 | R | LEU78 |  | Hydrophobic |
| Chain P↔Chain R | P | ILE82 | R | ILE82 |  | Hydrophobic |
| Chain P↔Chain R | P | ILE82 | R | LEU78 |  | Hydrophobic |
| Chain P↔Chain R | P | ILE86 | R | LEU94 |  | Hydrophobic |
| Chain P↔Chain R | P | ILE86 | R | ILE83 |  | Hydrophobic |
| Chain P↔Chain R | P | LEU89 | R | ILE83 |  | Hydrophobic |
| Chain P↔Chain R | P | ILE92 | R | TRP97 |  | Hydrophobic |
| Chain P↔Chain R | P | ILE92 | R | PHE100 |  | Hydrophobic |
| Chain P↔Chain R | P | ILE92 | R | LEU94 |  | Hydrophobic |
| Chain P↔Chain R | P | PHE100 | R | PHE100 | 5.54 | Hydrophobic (π–π stacking) |
| Chain P↔Chain R | P | PHE100 | R | TRP97 | 6.88 | π–π stacking |
