# Supplementary material for: Cryo-EM reveals a conserved baseplate architecture and distinct accessory protein assemblies in mycobacteriophages Claus, Corndog and Mysterious
Source: Research Square preprint supplement (doi:10.21203/rs.3.rs-9616548/v1), 2026-06-05
Supplement: Supplementary file 3 [file d433f7ee9af0753b69708b24.docx]

| Name of the Phage | Claus | Corndog | Mysterious |
| --- | --- | --- | --- |
| Cryo-EM equipment | Titan Krios | Titan Krios | Titan Krios |
| Voltage (kV) | 300 | 300 | 300 |
| Cs (mm) | 2.7 | 2.7 | 2.7 |
| Magnification (nominal) | 81,000 | 81,000 | 81,000 |
| Gun lens | 4 | 4 | 4 |
| Spot size | 3 | 3 | 3 |
| Detector | K3 | K3 | K3 |
| Detector (Operation mode) | Super resolution | Super resolution | Super resolution |
| Dose rate (e–/Å2 per second) | ~25.90 | ~33.06 | ~33.13 |
| Pixel size (Å/pixel) | 1.061 | 1.061 | 1.061 |
| Electron exposure (e–/Å2) | ~51.8 | ~52.9 | ~53.0 |
| Exposure time (s) | 2.0 | 1.6 | 1.6 |
| Frames (no.) | 60 | 60 | 60 |
| Defocus range (μm) | -0.352 to -3.499 | -0.351 to -3.496 | -0.350 to -3.492 |
| Grid type | R2/1 (2 nm C-film) | R2/1 (2 nm C-film) | R2/1 (2 nm C-film) |
| Reconstruction | Straight EMD: 0000 | Straight EMD: 00000 | Straight EMD: 00000 |
| Software cryoSPARC |  |  |  |
| Micrographs stacks (no.) | 15,258 | 6,674 | 18,782 |
| Final particle images (no.) | 47,725 | 23,182 | 14,824 |
| Symmetry imposed | C3 | C3 | C3 |
| Map final resolution (Å)† | 2.63 | 2.70 | 3.16 |
| Map sharpening B-factor (Å2) | -72.5 | -59.5 | -67.6 |
| Atomic modeling | PDB:  0000 [ref..] | PDB:  0000 | PDB:  0000 |
| Software |  |  |  |
| Number of protein residues | 8,970 | 12,132 | 13,887 |
| Number of metal ions | 0 | 0 | 0 |
| Number of atoms | 67,680 | 92820 | 105059 |
| Map CC (around atoms) | 0.89 | 0.86 | 0.88 |
| RMSD bond lengths (Å) | 0.003 | 0.002 | 0.003 |
| RMSD bond angles (°) | 0.552 | 0.552 | 0.667 |
| Clash score | 7.45 | 5.38 | 8.75 |
| Ramachandran favored (%) | 99.47 | 97.92 | 94.39 |
| Ramachandran allowed (%) | 0.53 | 2.03 | 5.40 |
| Ramachandran outliers (%) | 0.00 | 0.05 | 0.20 |
| Rotamer outliers (%) | 0.00 | 0.09 | 0.00 |
| Cβ deviations | 0.00 | 0.00 | 0.00 |
| MolProbity score | 1.41 | 1.31 | 1.85 |
| Model to map Q-Score | 0.74 | 0.75 | 0.64 |

**Supplementary Table 1.** Cryo-EM single particle refinements and validation statistics for the Claus, Corndog and Mysterious baseplates.

**Supplementary S2. Pairwise sequence identity and similarity analysis of MTP, DTP, and BHP proteins from mycobacteriophages Claus, Corndog, and Mysterious.** Pairwise global sequence alignments were performed for the MTP, DTP, and BHP proteins of the three mycobacteriophages using T-coffee. For each protein module, comparisons were conducted between Claus–Corndog, Claus–Mysterious, and Corndog–Mysterious. Alignment length represents the total number of aligned amino acid residues. Identical residues indicate exact amino acid matches, while similar residues correspond to conservative substitutions. Percent identity and percent similarity were calculated relative to the total alignment length.Across all three structural modules, sequence identity values remain low (approximately 5–14%), with moderate similarity levels, indicating substantial primary sequence divergence despite their conserved functional roles within the baseplate assembly.

| **Phages** | **Protein** | **Alignment Length (aa)** | | **Identical Residues** | **Similar Residues** | **Identity (%)** | **Similarity (%)** |
| --- | --- | --- | --- | --- | --- | --- | --- |
| Claus/Corndog | MTP | 334 | | 46 | 40 | 13.77 | 25.75 |
| Claus/Mysterious | MTP | 363 | | 35 | 35 | 9.64 | 19.28 |
| Corndog/Mysterious | MTP | 342 | | 44 | 33 | 12.87 | 22.51 |
|  | | | | | | | |
| Claus/Corndog | DTP | 623 | | 66 | 42 | 10.59 | 17.34 |
| Claus/Mysterious | DTP | 581 | | 32 | 31 | 5.51 | 10.84 |
| Corndog/Mysterious | DTP | 751 | | 66 | 54 | 8.79 | 15.98 |
|  | | | | | | | |
| Claus/Corndog | BHP | | 667 | 92 | 94 | 13.79 | 27.89 |
| Claus/Mysterious | BHP | | 655 | 43 | 52 | 6.56 | 14.50 |
| Corndog/Mysterious | BHP | | 663 | 38 | 61 | 5.73 | 14.93 |

**Supplementary Table 6. Cryo-EM density maps of mycobacteriophage baseplates deposited in the Electron Microscopy Data Bank (EMDB).** Three-dimensional reconstructions of the baseplate complexes from mycobacteriophages Claus, Corndog, and Mysterious are shown as EM density maps following single-particle cryo-electron microscopy analysis and refinement. The maps correspond to the deposited EMDB entries for Claus, Corndog, and Mysterious are shown with PDB code as well.

| Phage | Deposited data | EMDB | PDB |
| --- | --- | --- | --- |
| Claus | Complete PDB and consensus map of baseplate (C3)  Composite map (gp**13**, gp**17**, gp**18**, gp**20** and gp**26**) | EMD-69553  EMD-69568 | 24IX |
|  | Focused map (gp**13**)—Top MTP | EMD-69554 |  |
|  | Focused map (gp**17 and gp26**)—Middle, DTP, BppU | EMD-69565 |  |
|  | Focused map (gp**18 and gp20**)—Bottom, CFP, BHP | EMD-80282 |  |
| Corndog | Complete pdb and consensus map of baseplate (C3)  Composite map (gp**49,** gp**58,** gp**59,** gp**60 and** gp**61**) | EMD-69529  EMD-69542 | 24HO |
|  | Focused map – MTP (gp49) | EMD-69534 |  |
|  | Focused map - DTP-BHP-CFP-BppU | EMD-69535 |  |
| Mysterious | Complete Pdb andconsensus map of baseplate (C3)  Composite map (gp**20**, gp**28**, gp2**9**, gp**30**, gp**35**, gp**36, gp37, gp38, gp40** & gp**41**). | EMD-69628  EMD-69648 | 24LR |
|  | Focused map (gp**20**)-MTP | EMD-69629 |  |
|  | Focused map (gp**28, gp29** and gp**30**)-DTP, BHP, CFP | EMD-69630 |  |
|  | Focused map (gp**35, gp36, gp37**, gp**40** and gp**41**)-Fiber and terminator | EMD-69644 |  |
