# Supplementary material for: Cryo-EM reveals a conserved baseplate architecture and distinct accessory protein assemblies in mycobacteriophages Claus, Corndog and Mysterious
Source: Research Square preprint supplement (doi:10.21203/rs.3.rs-9616548/v1), 2026-06-05
Supplement: Supplementary file 4 [file d81fd5f487e10e6d6eb87752.docx]

**0mycobacteriophages *Claus*, *Corndog* and *Mysterious***

Sunil Kumar Tewary1,Chun-Hsiung Wang1, Ming-Ching Lin1,2, Melvin C. Shen1, Li-An Tsai1, 2, Yel1, Todd L. Lowary1,2 and Meng-Chiao Ho1,2

1Institute of Biological Chemistry, Academia Sinica; 2Institute of Biochemical Sciences, National Taiwan University

**Supplementary Tables**

**Mysterious inter and Intra subunit interactions-Table-S5**

**Supplementary Tables 5a**

**gp20 (MTP) chain A /gp28 (DTP) inter complex interaction**

| **Interface** | **Chain1** | **gp20** | **Chain2** | **gp28** | **Distance (Å)** | **Bond type** |
| --- | --- | --- | --- | --- | --- | --- |
| Chain A↔Chain K | A | SER30 | K | CYS99 | 3.75 | Contact |
| Chain A↔Chain K | A | SER30 | K | GLY98 | 3.62 | Hydrogen bond |
| Chain A↔Chain K | A | CYS31 | K | GLY98 | 3.84 | Hydrogen bond |
| Chain A↔Chain K | A | LYS33 | K | MET35 | 3.60 | Contact |
| Chain A↔Chain K | A | PRO34 | K | PHE36 | 3.86 | Contact |
| Chain A↔Chain K | A | SER125 | K | ARG100 |  | Hydrophobic |
| Chain A↔Chain K | A | ASP126 | K | ARG100 | 3.26 | Contact |
| Chain A↔Chain K | A | ILE193 | K | CYS99 | 3.69 | Contact |
| Chain A↔Chain K | A | ALA194 | K | CYS99 | 3.54 | Hydrogen bond |
| Chain A↔Chain K | A | ASN197 | K | PRO29 |  | Hydrophobic |
| Chain A↔Chain K | A | ASN197 | K | MET35 | 3.72 | Contact |
| Chain A↔Chain K | A | LYS222 | K | VAL26 |  | Hydrophobic |
| Chain A↔Chain K | A | THR249 | K | PHE36 |  | Hydrophobic |
| Chain A↔Chain K | A | SER250 | K | PHE36 |  | Hydrophobic |
| Chain A↔Chain K | A | TYR259 | K | PHE36 |  | Hydrophobic |
| Chain A↔Chain K | A | TYR259 | K | ASP32 | 3.44 | Hydrogen bond |
| Chain A↔Chain K | A | TYR260 | K | PHE36 |  | Hydrophobic |
| Chain A↔Chain K | A | TYR260 | K | THR30 | 3.45 | Contact |
| Chain A↔Chain K | A | TYR260 | K | PRO29 |  | Hydrophobic |
| Chain A↔Chain K | A | TYR260 | K | MET35 |  | Hydrophobic |
| Chain A↔Chain K | A | GLY261 | K | THR30 | 3.43 | Hydrogen bond |
| Chain A↔Chain K | A | GLY261 | K | ASP32 | 2.92 | Hydrogen bond |
| Chain A↔Chain K | A | GLY261 | K | SER31 | 3.49 | Contact |
| Chain A↔Chain L | A | LEU62 | L | PHE251 |  | Hydrophobic |
| Chain A↔Chain L | A | LEU62 | L | VAL263 |  | Hydrophobic |
| Chain A↔Chain L | A | GLN64 | L | MET145 | 3.55 | Hydrogen bond |
| Chain A↔Chain L | A | GLN64 | L | ARG265 |  | Hydrophobic |
| Chain A↔Chain L | A | ASN66 | L | ARG4 | 3.74 | Hydrogen bond |
| Chain A↔Chain L | A | ASN66 | L | ASP107 | 3.87 | Contact |
| Chain A↔Chain L | A | ASN66 | L | MET145 | 3.15 | Hydrogen bond |
| Chain A↔Chain L | A | ALA67 | L | MET145 | 3.88 | Hydrogen bond |
| Chain A↔Chain L | A | ALA67 | L | ASP146 | 3.89 | Contact |
| Chain A↔Chain L | A | GLU68 | L | ARG4 | 3.56 | Contact |
| Chain A↔Chain L | A | LYS70 | L | TYR105 |  | Hydrophobic |
| Chain A↔Chain L | A | GLU71 | L | GLY104 | 3.93 | Contact |
| Chain A↔Chain L | A | CYS72 | L | TYR105 | 3.76 | Contact |
| Chain A↔Chain L | A | CYS72 | L | GLU102 | 3.66 | Hydrogen bond |
| Chain A↔Chain L | A | CYS72 | L | GLY104 | 3.37 | Contact |
| Chain A↔Chain L | A | CYS72 | L | ILE103 | 3.88 | Contact |
| Chain A↔Chain L | A | CYS72 | L | ASP107 | 3.59 | Contact |
| Chain A↔Chain L | A | VAL73 | L | GLU102 | 3.63 | Contact |
| Chain A↔Chain L | A | VAL73 | L | LEU184 |  | Hydrophobic |
| Chain A↔Chain L | A | VAL73 | L | ILE186 |  | Hydrophobic |
| Chain A↔Chain L | A | VAL73 | L | TRP143 |  | Hydrophobic |
| Chain A↔Chain L | A | VAL73 | L | LEU101 |  | Hydrophobic |
| Chain A↔Chain L | A | SER74 | L | GLU102 | 3.75 | Contact |
| Chain A↔Chain L | A | SER74 | L | LEU101 | 3.48 | Contact |
| Chain A↔Chain L | A | ASP75 | L | LEU101 |  | Hydrophobic |
| Chain A↔Chain L | A | ASP75 | L | PHE251 |  | Hydrophobic |
| Chain A↔Chain L | A | ASP75 | L | GLY253 | 3.38 | Hydrogen bond |
| Chain A↔Chain L | A | ASP75 | L | ARG100 | 4.00 | Contact |
| Chain A↔Chain L | A | ARG76 | L | ARG100 | 3.25 | Hydrogen bond |
| Chain A↔Chain L | A | THR77 | L | PHE251 |  | Hydrophobic |
| Chain A↔Chain L | A | THR77 | L | ALA252 | 3.54 | Contact |
| Chain A↔Chain L | A | THR77 | L | GLY253 |  | Hydrophobic |
| Chain A↔Chain L | A | ALA78 | L | GLY254 | 3.91 | Hydrogen bond |
| Chain A↔Chain L | A | ALA78 | L | SER255 |  | Hydrophobic |

**Supplementary Tables 5a**

**gp20 (MTP) chain A interactions (Intra)**

| **Interface** | **Chain1** | **gp20** | **Chain2** | **gp20** | **Disatnce (Å)** | **Bond type** |
| --- | --- | --- | --- | --- | --- | --- |
| Chain A↔Chain B | A | ARG57 | B | GLU71 | 3.60 | Contact |
| Chain A↔Chain B | A | GLN60 | B | GLY69 | 3.84 | Contact |
| Chain A↔Chain B | A | GLN60 | B | LYS70 | 3.96 | Contact |
| Chain A↔Chain B | A | TRP83 | B | ARG76 |  | Hydrophobic |
| Chain A↔Chain B | A | ASN92 | B | PHE15 | 3.93 | Contact |
| Chain A↔Chain B | A | ASN92 | B | THR14 | 3.44 | Contact |
| Chain A↔Chain B | A | ASN92 | B | PRO16 |  | Hydrophobic |
| Chain A↔Chain B | A | VAL93 | B | PHE15 | 3.07 | Hydrogen bond |
| Chain A↔Chain B | A | VAL93 | B | THR14 | 3.93 | Contact |
| Chain A↔Chain B | A | VAL93 | B | LEU17 |  | Hydrophobic |
| Chain A↔Chain B | A | ASN94 | B | THR13 | 3.95 | Hydrogen bond |
| Chain A↔Chain B | A | ASN94 | B | THR14 | 3.06 | Hydrogen bond |
| Chain A↔Chain B | A | PRO95 | B | THR13 | 3.80 | Contact |
| Chain A↔Chain B | A | TRP104 | B | TYR84 | 3.68 | Contact |
| Chain A↔Chain B | A | LEU107 | B | THR218 | 3.47 | Contact |
| Chain A↔Chain B | A | LEU107 | B | THR227 |  | Hydrophobic |
| Chain A↔Chain B | A | ASP109 | B | LEU217 |  | Hydrophobic |
| Chain A↔Chain B | A | ALA110 | B | ASP208 |  | Hydrophobic |
| Chain A↔Chain B | A | ALA110 | B | ASP209 | 3.58 | Contact |
| Chain A↔Chain B | A | ALA110 | B | LEU217 | 3.42 | Contact |
| Chain A↔Chain B | A | VAL114 | B | THR13 | 3.36 | Contact |
| Chain A↔Chain B | A | VAL115 | B | PHE229 |  | Hydrophobic |
| Chain A↔Chain B | A | VAL115 | B | THR13 |  | Hydrophobic |
| Chain A↔Chain B | A | VAL115 | B | ARG230 | 3.01 | Hydrogen bond |
| Chain A↔Chain B | A | GLY116 | B | PHE229 |  | Hydrophobic |
| Chain A↔Chain B | A | GLY116 | B | VAL228 | 3.16 | Contact |
| Chain A↔Chain B | A | PHE117 | B | THR227 | 3.94 | Contact |
| Chain A↔Chain B | A | PHE117 | B | VAL228 | 3.92 | Contact |
| Chain A↔Chain B | A | ARG118 | B | GLU224 | 3.01 | Salt bridge (Electrostatic, Hydrogen bond) |
| Chain A↔Chain B | A | ARG118 | B | SER221 | 3.84 | Contact |
| Chain A↔Chain B | A | ARG118 | B | LEU226 | 3.79 | Contact |
| Chain A↔Chain B | A | ARG118 | B | THR218 | 3.57 | Contact |
| Chain A↔Chain B | A | ARG118 | B | PRO219 | 3.46 | Hydrogen bond |
| Chain A↔Chain B | A | ASP119 | B | TYR84 | 3.60 | Hydrogen bond |
| Chain A↔Chain B | A | ASP119 | B | LEU226 | 3.45 | Hydrogen bond |
| Chain A↔Chain B | A | ASP119 | B | LYS223 | 3.62 | Contact |
| Chain A↔Chain B | A | ASP119 | B | ARG81 | 3.89 | Contact |
| Chain A↔Chain B | A | ASP119 | B | HIS225 | 3.98 | Contact |
| Chain A↔Chain B | A | GLN120 | B | LYS223 | 3.87 | Hydrogen bond |
| Chain A↔Chain B | A | GLN120 | B | ARG81 | 3.92 | Hydrogen bond |
| Chain A↔Chain B | A | LYS121 | B | ARG81 | 3.99 | Hydrogen bond |
| Chain A↔Chain B | A | LYS121 | B | GLU80 | 3.81 | Contact |
| Chain A↔Chain B | A | ILE123 | B | PRO79 | 3.92 | Hydrogen bond |
| Chain A↔Chain B | A | ILE123 | B | MET56 | 3.92 | Contact |
| Chain A↔Chain B | A | SER125 | B | ALA78 |  | Hydrophobic |
| Chain A↔Chain B | A | GLU171 | B | PRO79 |  | Hydrophobic |
| Chain A↔Chain B | A | GLU171 | B | ARG76 | 3.60 | Contact |
| Chain A↔Chain B | A | THR173 | B | MET56 | 3.50 | Hydrogen bond |
| Chain A↔Chain B | A | ASP176 | B | LEU52 | 3.34 | Contact |
| Chain A↔Chain B | A | ILE177 | B | LEU52 | 3.13 | Hydrogen bond |
| Chain A↔Chain B | A | ILE177 | B | LEU50 | 3.62 | Hydrogen bond |
| Chain A↔Chain B | A | ILE177 | B | GLY51 | 3.65 | Contact |
| Chain A↔Chain B | A | ILE177 | B | PHE165 |  | Hydrophobic |
| Chain A↔Chain B | A | ILE177 | B | LEU17 |  | Hydrophobic |
| Chain A↔Chain B | A | ASN178 | B | LEU50 | 3.43 | Contact |
| Chain A↔Chain B | A | ASN178 | B | GLY51 | 3.47 | Contact |
| Chain A↔Chain B | A | ASN178 | B | LEU17 | 4.00 | Contact |
| Chain A↔Chain B | A | ILE179 | B | LEU50 | 2.98 | Hydrogen bond |
| Chain A↔Chain B | A | ILE179 | B | THR49 | 3.74 | Contact |
| Chain A↔Chain B | A | ILE179 | B | GLY20 |  | Hydrophobic |
| Chain A↔Chain B | A | ILE179 | B | THR135 |  | Hydrophobic |
| Chain A↔Chain B | A | GLY180 | B | LYS19 | 3.19 | Hydrogen bond |
| Chain A↔Chain B | A | GLY180 | B | VAL18 | 3.51 | Contact |
| Chain A↔Chain B | A | THR182 | B | LEU17 | 3.55 | Hydrogen bond |
| Chain A↔Chain B | A | VAL183 | B | VAL18 | 3.97 | Contact |
| Chain A↔Chain B | A | VAL183 | B | LEU17 | 3.92 | Contact |
| Chain A↔Chain B | A | ALA184 | B | LEU17 | 3.69 | Hydrogen bond |
| Chain A↔Chain B | A | LEU186 | B | LEU17 |  | Hydrophobic |
| Chain A↔Chain B | A | ARG191 | B | ARG76 | 3.25 | Contact |
| Chain A↔Chain B | A | GLN243 | B | THR13 | 3.51 | Hydrogen bond |
| Chain A↔Chain F | A | THR13 | F | PRO95 | 3.80 | Contact |
| Chain A↔Chain F | A | THR13 | F | VAL114 | 3.29 | Hydrogen bond |
| Chain A↔Chain F | A | THR13 | F | GLN243 | 3.48 | Hydrogen bond |
| Chain A↔Chain F | A | THR14 | F | ASN92 | 3.30 | Contact |
| Chain A↔Chain F | A | THR14 | F | ASN94 |  | Hydrophobic |
| Chain A↔Chain F | A | PHE15 | F | VAL93 | 3.30 | Contact |
| Chain A↔Chain F | A | PHE15 | F | ASN92 | 3.87 | Contact |
| Chain A↔Chain F | A | LEU17 | F | VAL93 |  | Hydrophobic |
| Chain A↔Chain F | A | LEU17 | F | GLY180 | 3.69 | Hydrogen bond |
| Chain A↔Chain F | A | LEU17 | F | ILE179 | 3.97 | Contact |
| Chain A↔Chain F | A | LEU17 | F | THR182 | 3.77 | Hydrogen bond |
| Chain A↔Chain F | A | LEU17 | F | ASN178 | 3.81 | Hydrogen bond |
| Chain A↔Chain F | A | LEU17 | F | ALA184 | 3.96 | Contact |
| Chain A↔Chain F | A | LEU17 | F | LEU186 |  | Hydrophobic |
| Chain A↔Chain F | A | LEU17 | F | ILE177 |  | Hydrophobic |
| Chain A↔Chain F | A | VAL18 | F | GLY180 | 3.43 | Contact |
| Chain A↔Chain F | A | VAL18 | F | THR182 |  | Hydrophobic |
| Chain A↔Chain F | A | VAL18 | F | VAL183 | 3.94 | Contact |
| Chain A↔Chain F | A | LYS19 | F | GLY180 | 3.31 | Hydrogen bond |
| Chain A↔Chain F | A | GLY20 | F | ILE179 |  | Hydrophobic |
| Chain A↔Chain F | A | THR49 | F | ILE179 | 3.26 | Contact |
| Chain A↔Chain F | A | LEU50 | F | ILE179 | 3.16 | Hydrogen bond |
| Chain A↔Chain F | A | LEU50 | F | ILE177 | 3.41 | Hydrogen bond |
| Chain A↔Chain F | A | LEU50 | F | ASN178 | 3.33 | Contact |
| Chain A↔Chain F | A | GLY51 | F | ASN178 | 3.67 | Contact |
| Chain A↔Chain F | A | GLY51 | F | ILE177 | 3.31 | Contact |
| Chain A↔Chain F | A | LEU52 | F | ILE177 | 2.93 | Hydrogen bond |
| Chain A↔Chain F | A | LEU52 | F | ASP176 | 3.41 | Contact |
| Chain A↔Chain F | A | MET56 | F | THR173 |  | Hydrophobic |
| Chain A↔Chain F | A | MET56 | F | ILE123 |  | Hydrophobic |
| Chain A↔Chain F | A | GLU71 | F | ARG57 | 3.77 | Contact |
| Chain A↔Chain F | A | ARG76 | F | GLU171 | 3.87 | Contact |
| Chain A↔Chain F | A | ARG76 | F | ARG191 | 3.67 | Contact |
| Chain A↔Chain F | A | THR77 | F | GLU171 | 3.99 | Contact |
| Chain A↔Chain F | A | ALA78 | F | GLU171 | 3.71 | Contact |
| Chain A↔Chain F | A | ALA78 | F | ILE123 | 3.96 | Contact |
| Chain A↔Chain F | A | ALA78 | F | SER125 |  | Hydrophobic |
| Chain A↔Chain F | A | PRO79 | F | GLU171 |  | Hydrophobic |
| Chain A↔Chain F | A | PRO79 | F | ILE123 | 3.51 | Contact |
| Chain A↔Chain F | A | GLU80 | F | LYS121 | 3.83 | Contact |
| Chain A↔Chain F | A | ARG81 | F | LYS121 | 3.59 | Hydrogen bond |
| Chain A↔Chain F | A | ARG81 | F | ASP119 | 3.80 | Salt bridge (Electrostatic, Hydrogen bond) |
| Chain A↔Chain F | A | ARG81 | F | GLN120 | 3.96 | Hydrogen bond |
| Chain A↔Chain F | A | TYR84 | F | ASP119 | 3.60 | Contact |
| Chain A↔Chain F | A | TYR84 | F | TRP104 | 3.85 | Contact |
| Chain A↔Chain F | A | THR135 | F | ILE179 |  | Hydrophobic |
| Chain A↔Chain F | A | PHE165 | F | ILE177 |  | Hydrophobic |
| Chain A↔Chain F | A | ASP208 | F | ALA110 |  | Hydrophobic |
| Chain A↔Chain F | A | ASP209 | F | ALA110 | 3.40 | Contact |
| Chain A↔Chain F | A | LEU217 | F | ASP109 |  | Hydrophobic |
| Chain A↔Chain F | A | LEU217 | F | ALA110 | 3.64 | Contact |
| Chain A↔Chain F | A | THR218 | F | ARG118 | 3.35 | Contact |
| Chain A↔Chain F | A | PRO219 | F | ARG118 | 3.39 | Hydrogen bond |
| Chain A↔Chain F | A | LYS223 | F | ASP119 | 3.43 | Salt bridge (Electrostatic, Hydrogen bond) |
| Chain A↔Chain F | A | LYS223 | F | GLN120 | 3.27 | Contact |
| Chain A↔Chain F | A | LYS223 | F | LYS121 | 3.76 | Hydrogen bond |
| Chain A↔Chain F | A | GLU224 | F | ARG118 |  | Hydrophobic |
| Chain A↔Chain F | A | HIS225 | F | ASP119 | 3.98 | Contact |
| Chain A↔Chain F | A | LEU226 | F | ASP119 | 2.92 | Hydrogen bond |
| Chain A↔Chain F | A | THR227 | F | LEU107 |  | Hydrophobic |
| Chain A↔Chain F | A | VAL228 | F | PHE117 |  | Hydrophobic |
| Chain A↔Chain F | A | VAL228 | F | GLY116 | 3.18 | Contact |
| Chain A↔Chain F | A | PHE229 | F | VAL115 | 3.33 | Contact |
| Chain A↔Chain F | A | PHE229 | F | GLY116 |  | Hydrophobic |
| Chain A↔Chain F | A | ARG230 | F | VAL115 | 3.03 | Hydrogen bond |

**Supplementary Tables 5b**

**gp28 (DTP) chain G /gp20 (MTP)/gp29 (BHP)/gp36/gp40 inter complex interaction**

| **Interface** | **Chain1** | **gp20** | **Chain2** | **gp28** | **Disatnce (Å)** | **Bond type** |
| --- | --- | --- | --- | --- | --- | --- |
| Chain F↔Chain G | F | GLN60 | G | PHE251 | 3.88 | Contact |
| Chain F↔Chain G | F | LEU62 | G | PHE251 |  | Hydrophobic |
| Chain F↔Chain G | F | GLN64 | G | ARG265 | 3.73 | Contact |
| Chain F↔Chain G | F | ASP65 | G | MET145 |  | Hydrophobic |
| Chain F↔Chain G | F | ASN66 | G | MET145 | 3.56 | Contact |
| Chain F↔Chain G | F | ASN66 | G | ARG4 | 3.84 | Hydrogen bond |
| Chain F↔Chain G | F | ASN66 | G | ASP107 | 3.20 | Hydrogen bond |
| Chain F↔Chain G | F | ALA67 | G | MET145 | 3.57 | Hydrogen bond |
| Chain F↔Chain G | F | GLU68 | G | ARG4 | 3.61 | Contact |
| Chain F↔Chain G | F | LYS70 | G | TYR105 |  | Hydrophobic |
| Chain F↔Chain G | F | GLU71 | G | GLY104 | 3.68 | Contact |
| Chain F↔Chain G | F | GLU71 | G | TYR105 | 2.99 | Hydrogen bond |
| Chain F↔Chain G | F | CYS72 | G | MET145 | 3.67 | Contact |
| Chain F↔Chain G | F | CYS72 | G | ASP107 | 3.38 | Hydrogen bond |
| Chain F↔Chain G | F | CYS72 | G | TYR105 | 3.79 | Contact |
| Chain F↔Chain G | F | CYS72 | G | GLY104 | 3.83 | Contact |
| Chain F↔Chain G | F | CYS72 | G | ILE103 | 3.88 | Contact |
| Chain F↔Chain G | F | VAL73 | G | GLU102 | 3.75 | Contact |
| Chain F↔Chain G | F | VAL73 | G | LEU184 |  | Hydrophobic |
| Chain F↔Chain G | F | VAL73 | G | LEU101 |  | Hydrophobic |
| Chain F↔Chain G | F | SER74 | G | GLU102 | 3.82 | Contact |
| Chain F↔Chain G | F | SER74 | G | ARG100 | 3.59 | Hydrogen bond |
| Chain F↔Chain G | F | SER74 | G | LEU101 | 3.88 | Contact |
| Chain F↔Chain G | F | ASP75 | G | ARG100 | 3.84 | Contact |
| Chain F↔Chain G | F | ASP75 | G | PHE251 | 3.84 | Contact |
| Chain F↔Chain G | F | ASP75 | G | LEU101 |  | Hydrophobic |
| Chain F↔Chain G | F | ASP75 | G | GLY253 | 3.99 | Contact |
| Chain F↔Chain G | F | ARG76 | G | ARG100 | 3.57 | Hydrogen bond |
| Chain F↔Chain G | F | THR77 | G | PHE251 |  | Hydrophobic |
| Chain F↔Chain G | F | THR77 | G | ALA252 | 3.60 | Contact |
| Chain F↔Chain G | F | THR77 | G | GLY253 |  | Hydrophobic |
| Chain F↔Chain G | F | THR77 | G | GLY254 | 3.97 | Contact |
| Chain F↔Chain G | F | ALA78 | G | GLY254 | 3.94 | Contact |

| **Interface** | **Chain1** | **gp28** | **Chain2** | **gp29** | **Disatnce (Å)** | **Bond type** |
| --- | --- | --- | --- | --- | --- | --- |
| Chain G↔Chain N | G | PRO334 | N | TRP303 |  | Hydrophobic |
| Chain G↔Chain N | G | ASN335 | N | TRP303 |  | Hydrophobic |
| Chain G↔Chain N | G | ASN335 | N | MET200 |  | Hydrophobic |
| Chain G↔Chain N | G | SER417 | N | ARG288 | 3.42 | Hydrogen bond |
| Chain G↔Chain N | G | ARG419 | N | ARG288 | 3.57 | Contact |
| Chain G↔Chain N | G | ARG419 | N | SER204 | 3.98 | Hydrogen bond |
| Chain G↔Chain N | G | ARG419 | N | ASP205 | 3.53 | Salt bridge (Electrostatic, Hydrogen bond) |
| Chain G↔Chain N | G | ARG419 | N | HIS286 | 3.79 | Hydrogen bond |
| Chain G↔Chain N | G | ARG419 | N | ALA289 | 3.91 | Hydrogen bond |
| Chain G↔Chain N | G | ARG419 | N | PRO290 | 3.47 | Contact |
| Chain G↔Chain N | G | TYR420 | N | PRO290 | 3.74 | Contact |
| Chain G↔Chain N | G | LYS428 | N | GLN5 | 3.99 | Contact |
| Chain G↔Chain N | G | ARG430 | N | HIS6 | 3.55 | Contact |
| Chain G↔Chain N | G | ARG430 | N | PRO290 | 3.71 | Contact |
| Chain G↔Chain N | G | TRP432 | N | ILE198 |  | Hydrophobic |
| Chain G↔Chain N | G | TRP432 | N | GLU295 |  | Hydrophobic |
| Chain G↔Chain N | G | GLY440 | N | TRP303 | 3.95 | Contact |
| Chain G↔Chain N | G | GLY440 | N | THR305 | 3.70 | Hydrogen bond |
| Chain G↔Chain N | G | ALA441 | N | THR305 | 3.29 | Contact |
| Chain G↔Chain N | G | PRO442 | N | THR305 |  | Hydrophobic |
| Chain G↔Chain N | G | PRO442 | N | LEU201 | 3.57 | Contact |
| Chain G↔Chain N | G | PRO442 | N | GLY202 | 3.76 | Contact |
| Chain G↔Chain N | G | PRO442 | N | MET200 |  | Hydrophobic |

| **Interface** | **Chain1** | **gp35** | **Chain2** | **gp28** | **Disatnce (Å)** | **Bond type** |
| --- | --- | --- | --- | --- | --- | --- |
| Chain AQ↔Chain G | AQ | THR2 | G | GLN294 | 3.48 | Hydrogen bond |
| Chain AQ↔Chain G | AQ | SER3 | G | GLN294 | 3.07 | Hydrogen bond |
| Chain AQ↔Chain G | AQ | SER3 | G | ARG347 | 3.84 | Contact |
| Chain AQ↔Chain G | AQ | PRO4 | G | GLN294 | 3.23 | Contact |
| Chain AQ↔Chain G | AQ | PRO4 | G | LYS297 | 3.59 | Hydrogen bond |
| Chain AQ↔Chain G | AQ | THR5 | G | LYS297 | 3.69 | Contact |
| Chain AQ↔Chain G | AQ | THR5 | G | VAL299 | 3.99 | Contact |
| Chain AQ↔Chain G | AQ | VAL6 | G | VAL299 | 3.65 | Contact |
| Chain AQ↔Chain G | AQ | VAL6 | G | TRP298 | 3.98 | Contact |
| Chain AQ↔Chain G | AQ | VAL6 | G | LYS297 | 3.30 | Hydrogen bond |
| Chain AQ↔Chain G | AQ | VAL6 | G | ILE296 |  | Hydrophobic |
| Chain AQ↔Chain G | AQ | CYS7 | G | VAL299 |  | Hydrophobic |
| Chain AQ↔Chain G | AQ | VAL8 | G | VAL299 | 3.41 | Hydrogen bond |
| Chain AQ↔Chain G | AQ | VAL14 | G | TRP298 | 3.80 | Contact |
| Chain AQ↔Chain G | AQ | GLY18 | G | TRP298 | 3.09 | Contact |
| Chain AQ↔Chain G | AQ | LEU20 | G | TRP298 |  | Hydrophobic |

| **Interface** | **Chain1** | **gp36** | **Chain2** | **gp28** | **Disatnce (Å)** | **Bond type** |
| --- | --- | --- | --- | --- | --- | --- |
| Chain AW↔Chain G | AW | SER2 | G | ASP394 | 3.77 | Contact |
| Chain AW↔Chain G | AW | LEU4 | G | LEU340 |  | Hydrophobic |
| Chain AW↔Chain G | AW | LEU4 | G | LEU345 |  | Hydrophobic |
| Chain AW↔Chain G | AW | LYS5 | G | LEU340 | 3.34 | Contact |
| Chain AW↔Chain G | AW | LYS5 | G | GLY338 | 3.27 | Contact |
| Chain AW↔Chain G | AW | LYS5 | G | ASN335 | 3.91 | Contact |
| Chain AW↔Chain G | AW | LYS5 | G | CYS336 | 3.94 | Contact |
| Chain AW↔Chain G | AW | LEU6 | G | LEU340 | 3.66 | Contact |
| Chain AW↔Chain G | AW | LEU6 | G | TRP298 |  | Hydrophobic |
| Chain AW↔Chain G | AW | LEU6 | G | ILE296 |  | Hydrophobic |
| Chain AW↔Chain G | AW | CYS7 | G | LEU340 | 2.81 | Hydrogen bond |
| Chain AW↔Chain G | AW | CYS7 | G | CYS339 |  | Hydrophobic |
| Chain AW↔Chain G | AW | CYS7 | G | VAL342 | 3.79 | Contact |
| Chain AW↔Chain G | AW | CYS7 | G | PRO341 | 3.55 | Contact |
| Chain AW↔Chain G | AW | ASN15 | G | PRO334 | 3.45 | Hydrogen bond |
| Chain AW↔Chain G | AW | VAL16 | G | SER439 |  | Hydrophobic |
| Chain AW↔Chain G | AW | VAL16 | G | PRO438 |  | Hydrophobic |

| **Interface** | **Chain1** | **gp40** | **Chain2** | **gp28** | **Disatnce (Å)** | **Bond type** |
| --- | --- | --- | --- | --- | --- | --- |
| Chain AB↔Chain G | AB | ILE3 | G | VAL56 | 3.58 | Contact |
| Chain AB↔Chain G | AB | ALA4 | G | SER54 | 3.30 | Contact |
| Chain AB↔Chain G | AB | ALA4 | G | ILE47 |  | Hydrophobic |
| Chain AB↔Chain G | AB | ASN5 | G | SER54 | 2.99 | Hydrogen bond |
| Chain AB↔Chain G | AB | ASN5 | G | LEU53 | 3.58 | Contact |
| Chain AB↔Chain G | AB | ASN5 | G | GLN60 | 3.73 | Hydrogen bond |
| Chain AB↔Chain G | AB | ASN5 | G | LEU44 | 3.61 | Contact |
| Chain AB↔Chain G | AB | VAL6 | G | LEU53 |  | Hydrophobic |
| Chain AB↔Chain G | AB | MET7 | G | LEU52 | 3.51 | Hydrogen bond |
| Chain AB↔Chain G | AB | MET7 | G | SER54 | 3.97 | Contact |
| Chain AB↔Chain G | AB | MET7 | G | LEU53 | 3.70 | Contact |
| Chain AB↔Chain G | AB | MET8 | G | LEU83 | 3.55 | Contact |
| Chain AB↔Chain G | AB | LYS17 | G | LEU52 | 3.27 | Contact |
| Chain AB↔Chain G | AB | LEU18 | G | LEU52 |  | Hydrophobic |
| Chain AB↔Chain G | AB | ASP19 | G | LEU52 | 3.78 | Contact |
| Chain AB↔Chain G | AB | ASP19 | G | LEU53 |  | Hydrophobic |
| Chain AB↔Chain G | AB | ASP19 | G | ARG51 | 3.57 | Contact |
| Chain AB↔Chain G | AB | ASP20 | G | ARG51 | 3.90 | Salt bridge (Electrostatic, Hydrogen bond) |
| Chain AB↔Chain G | AB | GLU21 | G | ARG51 | 3.64 | Contact |
| Chain AC↔Chain G | AC | THR2 | G | VAL85 | 3.98 | Contact |
| Chain AC↔Chain G | AC | ALA4 | G | LEU83 |  | Hydrophobic |
| Chain AC↔Chain G | AC | ALA4 | G | GLY84 | 3.63 | Contact |
| Chain AC↔Chain G | AC | ALA4 | G | VAL85 |  | Hydrophobic |
| Chain AC↔Chain G | AC | ASN5 | G | LEU83 |  | Hydrophobic |
| Chain AC↔Chain G | AC | ASN5 | G | GLY84 | 3.94 | Contact |
| Chain AC↔Chain G | AC | ASN5 | G | VAL86 | 3.31 | Contact |
| Chain AC↔Chain G | AC | VAL6 | G | LEU83 |  | Hydrophobic |
| Chain AC↔Chain G | AC | VAL6 | G | GLY82 | 3.78 | Contact |
| Chain AC↔Chain G | AC | MET7 | G | GLY82 | 3.16 | Hydrogen bond |
| Chain AC↔Chain G | AC | MET7 | G | GLY84 | 3.84 | Contact |
| Chain AC↔Chain G | AC | MET7 | G | PRO72 |  | Hydrophobic |
| Chain AC↔Chain G | AC | ASP19 | G | GLY82 | 3.53 | Contact |
| Chain AD↔Chain G | AD | THR2 | G | SER117 | 3.08 | Hydrogen bond |
| Chain AD↔Chain G | AD | THR2 | G | GLY119 | 3.90 | Contact |
| Chain AD↔Chain G | AD | ILE3 | G | PRO72 | 3.24 | Contact |
| Chain AD↔Chain G | AD | ALA4 | G | TYR70 | 3.54 | Contact |
| Chain AD↔Chain G | AD | ASN5 | G | PRO72 | 3.65 | Contact |
| Chain AD↔Chain G | AD | ASN5 | G | TYR70 | 3.24 | Hydrogen bond |
| Chain AD↔Chain G | AD | ASN5 | G | LEU69 | 3.96 | Contact |
| Chain AD↔Chain G | AD | ASN5 | G | PRO73 | 3.30 | Contact |
| Chain AD↔Chain G | AD | ASN5 | G | GLN60 | 3.78 | Hydrogen bond |
| Chain AD↔Chain G | AD | MET7 | G | TYR70 |  | Hydrophobic |
| Chain AD↔Chain G | AD | MET8 | G | LEU53 |  | Hydrophobic |
| Chain AD↔Chain G | AD | LEU18 | G | LEU68 |  | Hydrophobic |
| Chain AD↔Chain G | AD | ASP19 | G | LEU68 |  | Hydrophobic |
| Chain AD↔Chain G | AD | ASP19 | G | ARG67 | 3.66 | Contact |
| Chain AD↔Chain G | AD | ASP19 | G | LEU69 | 3.77 | Hydrogen bond |
| Chain AD↔Chain G | AD | GLU21 | G | ARG67 | 3.47 | Contact |
| Chain AD↔Chain G | AD | ASP36 | G | GLY425 | 3.43 | Hydrogen bond |

**Supplementary Tables 5b**

**gp28 (DTP) chain G interactions (Intra)**

| **Interface** | **Chain1** | **gp28** | **Chain2** | **gp28** | **Disatnce (Å)** | **Bond type** |
| --- | --- | --- | --- | --- | --- | --- |
| Chain G↔Chain H | G | ARG4 | H | GLN260 | 3.93 | Contact |
| Chain G↔Chain H | G | TYR105 | H | GLN259 | 3.39 | Contact |
| Chain G↔Chain H | G | TYR105 | H | ARG256 | 2.87 | Hydrogen bond |
| Chain G↔Chain H | G | ASP106 | H | THR257 | 3.96 | Contact |
| Chain G↔Chain H | G | THR108 | H | ASN258 | 3.83 | Contact |
| Chain G↔Chain H | G | PRO110 | H | ASN258 |  | Hydrophobic |
| Chain G↔Chain H | G | GLY151 | H | GLN198 | 3.85 | Contact |
| Chain G↔Chain H | G | PRO152 | H | PRO245 | 3.34 | Contact |
| Chain G↔Chain H | G | PRO152 | H | GLN198 | 3.77 | Hydrogen bond |
| Chain G↔Chain H | G | PRO152 | H | ALA201 |  | Hydrophobic |
| Chain G↔Chain H | G | THR153 | H | ARG205 | 3.87 | Contact |
| Chain G↔Chain H | G | THR153 | H | GLU244 | 3.79 | Contact |
| Chain G↔Chain H | G | PRO154 | H | GLU244 | 3.30 | Contact |
| Chain G↔Chain H | G | VAL155 | H | GLU244 | 3.58 | Hydrogen bond |
| Chain G↔Chain H | G | VAL155 | H | ARG205 | 3.34 | Contact |
| Chain G↔Chain H | G | VAL155 | H | LEU241 | 3.48 | Contact |
| Chain G↔Chain H | G | VAL155 | H | THR242 | 3.99 | Contact |
| Chain G↔Chain H | G | ARG157 | H | LEU241 | 3.88 | Contact |
| Chain G↔Chain H | G | ARG157 | H | THR242 | 3.57 | Contact |
| Chain G↔Chain H | G | ARG157 | H | VAL240 |  | Hydrophobic |
| Chain G↔Chain H | G | ARG157 | H | THR207 | 3.28 | Hydrogen bond |
| Chain G↔Chain H | G | ARG157 | H | VAL208 | 3.59 | Contact |
| Chain G↔Chain H | G | MET159 | H | SER176 | 3.42 | Hydrogen bond |
| Chain G↔Chain H | G | GLU161 | H | ARG173 | 4.00 | Contact |
| Chain G↔Chain H | G | GLU161 | H | THR175 | 3.57 | Contact |
| Chain G↔Chain H | G | GLU161 | H | SER176 | 3.09 | Hydrogen bond |
| Chain G↔Chain H | G | MET162 | H | ARG173 | 2.91 | Hydrogen bond |
| Chain G↔Chain H | G | ALA163 | H | ARG173 | 3.93 | Hydrogen bond |
| Chain G↔Chain H | G | GLY164 | H | ARG173 | 3.65 | Hydrogen bond |
| Chain G↔Chain H | G | GLY164 | H | ASP174 | 3.86 | Hydrogen bond |
| Chain G↔Chain H | G | PRO165 | H | TYR276 | 3.84 | Contact |
| Chain G↔Chain H | G | PRO165 | H | ASP174 | 3.46 | Contact |
| Chain G↔Chain H | G | GLY166 | H | ASP174 | 3.99 | Hydrogen bond |
| Chain G↔Chain H | G | GLY166 | H | SER176 | 3.94 | Hydrogen bond |
| Chain G↔Chain H | G | GLY166 | H | ARG173 | 3.00 | Hydrogen bond |
| Chain G↔Chain H | G | GLY166 | H | PRO275 |  | Hydrophobic |
| Chain G↔Chain H | G | GLY166 | H | SER273 | 3.13 | Contact |
| Chain G↔Chain H | G | GLY167 | H | SER273 | 3.24 | Hydrogen bond |
| Chain G↔Chain H | G | PRO169 | H | VAL240 |  | Hydrophobic |
| Chain G↔Chain H | G | PRO169 | H | ASP211 | 3.36 | Contact |
| Chain G↔Chain H | G | HIS172 | H | VAL208 |  | Hydrophobic |
| Chain G↔Chain H | G | HIS172 | H | ARG205 | 3.86 | Contact |
| Chain G↔Chain H | G | ASP174 | H | ARG205 | 3.53 | Salt bridge (Electrostatic, Hydrogen bond) |
| Chain G↔Chain H | G | ALA219 | H | GLN194 | 3.86 | Hydrogen bond |
| Chain G↔Chain H | G | ALA220 | H | GLN194 |  | Hydrophobic |
| Chain G↔Chain H | G | ALA220 | H | ALA191 |  | Hydrophobic |
| Chain G↔Chain H | G | HIS221 | H | SER190 | 3.84 | Hydrogen bond |
| Chain G↔Chain H | G | HIS221 | H | GLN260 | 3.80 | Hydrogen bond |
| Chain G↔Chain H | G | HIS221 | H | ALA191 | 3.62 | Hydrogen bond |
| Chain G↔Chain H | G | HIS221 | H | ASN258 | 3.47 | Hydrogen bond |
| Chain G↔Chain H | G | GLY223 | H | ASN258 | 3.45 | Contact |
| Chain G↔Chain H | G | HIS224 | H | ASN258 | 3.57 | Contact |
| Chain G↔Chain H | G | HIS224 | H | ARG256 | 3.77 | Contact |
| Chain G↔Chain H | G | HIS224 | H | THR189 | 3.24 | Contact |
| Chain G↔Chain H | G | SER225 | H | GLU138 | 3.99 | Contact |
| Chain G↔Chain H | G | SER225 | H | GLU135 | 3.52 | Contact |
| Chain G↔Chain H | G | SER225 | H | ALA191 |  | Hydrophobic |
| Chain G↔Chain H | G | SER226 | H | GLU138 | 3.74 | Hydrogen bond |
| Chain G↔Chain H | G | SER226 | H | PRO134 |  | Hydrophobic |
| Chain G↔Chain H | G | ALA227 | H | GLU135 |  | Hydrophobic |
| Chain G↔Chain H | G | SER356 | H | ARG132 | 3.70 | Contact |
| Chain G↔Chain H | G | PRO358 | H | SER130 |  | Hydrophobic |
| Chain G↔Chain H | G | PRO358 | H | ALA133 | 3.91 | Contact |
| Chain G↔Chain H | G | PRO358 | H | ARG132 |  | Hydrophobic |
| Chain G↔Chain H | G | TYR359 | H | TYR195 |  | Hydrophobic |
| Chain G↔Chain H | G | TYR359 | H | ALA133 |  | Hydrophobic |
| Chain G↔Chain H | G | ARG360 | H | ARG203 | 3.90 | Hydrogen bond |
| Chain G↔Chain H | G | ARG360 | H | CYS202 | 3.72 | Hydrogen bond |
| Chain G↔Chain H | G | CYS361 | H | CYS202 | 3.51 | Contact |
| Chain G↔Chain H | G | GLU476 | H | GLN198 | 3.53 | Contact |
| Chain G↔Chain H | G | ALA477 | H | ARG205 |  | Hydrophobic |
| Chain G↔Chain L | G | SER130 | L | PRO358 |  | Hydrophobic |
| Chain G↔Chain L | G | ARG132 | L | PRO358 |  | Hydrophobic |
| Chain G↔Chain L | G | ARG132 | L | SER356 | 3.84 | Contact |
| Chain G↔Chain L | G | ALA133 | L | TYR359 | 3.58 | Contact |
| Chain G↔Chain L | G | ALA133 | L | PRO358 | 3.85 | Contact |
| Chain G↔Chain L | G | PRO134 | L | SER226 |  | Hydrophobic |
| Chain G↔Chain L | G | GLU135 | L | ALA227 |  | Hydrophobic |
| Chain G↔Chain L | G | GLU135 | L | SER225 | 3.47 | Contact |
| Chain G↔Chain L | G | GLU138 | L | SER225 | 3.99 | Contact |
| Chain G↔Chain L | G | GLU138 | L | SER226 | 3.75 | Hydrogen bond |
| Chain G↔Chain L | G | ARG173 | L | ALA163 | 3.24 | Contact |
| Chain G↔Chain L | G | ARG173 | L | GLY164 | 3.27 | Contact |
| Chain G↔Chain L | G | ARG173 | L | MET162 | 3.68 | Contact |
| Chain G↔Chain L | G | ARG173 | L | GLU161 |  | Hydrophobic |
| Chain G↔Chain L | G | ARG173 | L | GLY166 | 3.53 | Hydrogen bond |
| Chain G↔Chain L | G | ASP174 | L | PRO165 | 3.74 | Contact |
| Chain G↔Chain L | G | ASP174 | L | GLY166 | 3.91 | Contact |
| Chain G↔Chain L | G | THR175 | L | GLU161 | 3.75 | Contact |
| Chain G↔Chain L | G | THR175 | L | GLY166 | 3.96 | Hydrogen bond |
| Chain G↔Chain L | G | SER176 | L | GLU161 | 3.75 | Contact |
| Chain G↔Chain L | G | SER176 | L | MET159 |  | Hydrophobic |
| Chain G↔Chain L | G | SER176 | L | GLY166 | 3.93 | Contact |
| Chain G↔Chain L | G | SER176 | L | GLY167 | 3.46 | Hydrogen bond |
| Chain G↔Chain L | G | THR189 | L | HIS224 | 3.24 | Contact |
| Chain G↔Chain L | G | SER190 | L | ALA220 | 3.94 | Contact |
| Chain G↔Chain L | G | SER190 | L | HIS221 | 3.30 | Contact |
| Chain G↔Chain L | G | ALA191 | L | HIS221 | 3.87 | Contact |
| Chain G↔Chain L | G | ALA191 | L | SER225 |  | Hydrophobic |
| Chain G↔Chain L | G | ALA191 | L | ALA220 |  | Hydrophobic |
| Chain G↔Chain L | G | GLN194 | L | ALA220 |  | Hydrophobic |
| Chain G↔Chain L | G | GLN194 | L | ALA219 | 3.78 | Contact |
| Chain G↔Chain L | G | TYR195 | L | TYR359 |  | Hydrophobic |
| Chain G↔Chain L | G | GLN198 | L | PRO152 | 3.79 | Hydrogen bond |
| Chain G↔Chain L | G | GLN198 | L | GLY151 | 3.84 | Contact |
| Chain G↔Chain L | G | GLN198 | L | GLU476 | 3.92 | Contact |
| Chain G↔Chain L | G | ALA201 | L | PRO152 |  | Hydrophobic |
| Chain G↔Chain L | G | CYS202 | L | CYS361 |  | Hydrophobic |
| Chain G↔Chain L | G | ARG203 | L | ARG360 | 3.27 | Contact |
| Chain G↔Chain L | G | ARG205 | L | ALA477 | 3.28 | Contact |
| Chain G↔Chain L | G | ARG205 | L | ASP174 | 3.93 | Salt bridge (Electrostatic, Hydrogen bond) |
| Chain G↔Chain L | G | ARG205 | L | VAL155 | 3.36 | Contact |
| Chain G↔Chain L | G | ARG205 | L | THR153 | 3.57 | Hydrogen bond |
| Chain G↔Chain L | G | THR207 | L | ARG157 | 3.05 | Hydrogen bond |
| Chain G↔Chain L | G | VAL208 | L | HIS172 | 3.85 | Contact |
| Chain G↔Chain L | G | ASP211 | L | PRO169 | 3.78 | Contact |
| Chain G↔Chain L | G | VAL240 | L | PRO169 |  | Hydrophobic |
| Chain G↔Chain L | G | VAL240 | L | ARG157 |  | Hydrophobic |
| Chain G↔Chain L | G | LEU241 | L | ARG157 | 3.88 | Contact |
| Chain G↔Chain L | G | THR242 | L | VAL155 | 3.92 | Contact |
| Chain G↔Chain L | G | GLU244 | L | PRO154 | 3.29 | Contact |
| Chain G↔Chain L | G | GLU244 | L | PRO152 | 3.68 | Contact |
| Chain G↔Chain L | G | GLU244 | L | THR153 | 3.31 | Contact |
| Chain G↔Chain L | G | GLU244 | L | VAL155 | 3.20 | Contact |
| Chain G↔Chain L | G | PRO245 | L | PRO152 | 3.90 | Contact |
| Chain G↔Chain L | G | ARG256 | L | TYR105 | 3.19 | Contact |
| Chain G↔Chain L | G | ARG256 | L | HIS224 |  | Hydrophobic |
| Chain G↔Chain L | G | THR257 | L | ASP106 | 3.72 | Contact |
| Chain G↔Chain L | G | THR257 | L | ASP107 | 3.88 | Hydrogen bond |
| Chain G↔Chain L | G | ASN258 | L | THR108 | 3.50 | Hydrogen bond |
| Chain G↔Chain L | G | ASN258 | L | PRO110 | 3.80 | Contact |
| Chain G↔Chain L | G | ASN258 | L | HIS221 | 3.95 | Contact |
| Chain G↔Chain L | G | ASN258 | L | HIS224 |  | Hydrophobic |
| Chain G↔Chain L | G | ASN258 | L | GLY223 | 3.66 | Contact |
| Chain G↔Chain L | G | GLN259 | L | TYR105 | 3.53 | Contact |
| Chain G↔Chain L | G | GLN260 | L | ARG4 | 3.83 | Contact |
| Chain G↔Chain L | G | GLN260 | L | HIS221 |  | Hydrophobic |
| Chain G↔Chain L | G | SER273 | L | MET159 |  | Hydrophobic |
| Chain G↔Chain L | G | SER273 | L | GLY167 | 3.35 | Hydrogen bond |
| Chain G↔Chain L | G | SER273 | L | GLY166 | 3.82 | Contact |

**Supplementary Tables 5c**

**gp29 (BHP) chain M /gp28 (DTP)/gp30(CFP)/gp35/gp36/gp41 inter complex interaction**

| **Interface** | **Chain1** | **gp28** | **Chain2** | **gp29** | **Disatnce (Å)** | **Bond type** |
| --- | --- | --- | --- | --- | --- | --- |
| Chain J↔Chain M | J | PRO158 | M | GLY325 | 3.24 | Contact |
| Chain J↔Chain M | J | THR160 | M | ILE207 |  | Hydrophobic |
| Chain J↔Chain M | J | GLU161 | M | GLY208 | 3.29 | Contact |
| Chain J↔Chain M | J | MET162 | M | GLY208 | 3.96 | Contact |
| Chain J↔Chain M | J | MET162 | M | ILE207 |  | Hydrophobic |
| Chain J↔Chain M | J | ALA163 | M | GLY208 | 3.88 | Hydrogen bond |
| Chain J↔Chain M | J | ALA163 | M | GLY210 |  | Hydrophobic |
| Chain J↔Chain M | J | VAL168 | M | PRO287 |  | Hydrophobic |
| Chain J↔Chain M | J | VAL168 | M | ILE207 |  | Hydrophobic |
| Chain J↔Chain M | J | VAL168 | M | HIS286 |  | Hydrophobic |
| Chain J↔Chain M | J | PRO171 | M | GLY325 | 3.99 | Contact |
| Chain J↔Chain M | J | PRO171 | M | ASP11 | 3.77 | Contact |
| Chain J↔Chain M | J | PRO171 | M | SER326 | 3.99 | Contact |
| Chain J↔Chain M | J | HIS172 | M | ASP11 | 3.54 | Salt bridge (Electrostatic, Hydrogen bond) |
| Chain J↔Chain M | J | ARG173 | M | ALA324 |  | Hydrophobic |
| Chain J↔Chain M | J | ARG173 | M | GLY325 | 3.34 | Contact |
| Chain J↔Chain M | J | PRO334 | M | GLY21 | 3.57 | Hydrogen bond |
| Chain J↔Chain M | J | ASN335 | M | GLY21 | 3.17 | Contact |
| Chain J↔Chain M | J | ASN335 | M | ASP142 | 3.53 | Hydrogen bond |
| Chain J↔Chain M | J | GLY418 | M | ARG29 | 3.22 | Contact |
| Chain J↔Chain M | J | ARG427 | M | ARG60 | 3.94 | Hydrogen bond |
| Chain J↔Chain M | J | ARG430 | M | ASP57 | 3.91 | Contact |
| Chain J↔Chain M | J | ARG430 | M | ARG60 | 3.91 | Hydrogen bond |
| Chain J↔Chain M | J | TRP432 | M | LEU25 |  | Hydrophobic |
| Chain J↔Chain M | J | SER439 | M | ASP79 | 3.86 | Contact |
| Chain J↔Chain M | J | GLY440 | M | TRP74 |  | Hydrophobic |
| Chain J↔Chain M | J | GLY440 | M | GLN18 | 3.39 | Hydrogen bond |
| Chain J↔Chain M | J | ALA441 | M | TRP74 | 3.98 | Contact |
| Chain J↔Chain M | J | ALA441 | M | ASP79 | 3.28 | Contact |
| Chain J↔Chain M | J | PRO442 | M | TRP74 |  | Hydrophobic |
| Chain J↔Chain M | J | PRO442 | M | GLU27 | 3.32 | Contact |
| Chain J↔Chain M | J | TRP443 | M | ARG29 | 3.88 | Contact |
| Chain J↔Chain M | J | GLN444 | M | ILE14 |  | Hydrophobic |
| Chain J↔Chain M | J | GLN444 | M | GLY76 | 3.61 | Hydrogen bond |

| **Interface** | **Chain1** | **gp29** | **Chain2** | **gp30** | **Disatnce (Å)** | **Bond type** |
| --- | --- | --- | --- | --- | --- | --- |
| Chain AN↔Chain M | AN | SER2 | M | GLU316 | 3.08 | Hydrogen bond |
| Chain AN↔Chain M | AN | SER2 | M | ALA43 | 3.27 | Contact |
| Chain AN↔Chain M | AN | ILE4 | M | ALA43 |  | Hydrophobic |
| Chain AN↔Chain M | AN | ILE4 | M | LYS172 |  | Hydrophobic |
| Chain AN↔Chain M | AN | ALA5 | M | VAL175 |  | Hydrophobic |
| Chain AN↔Chain M | AN | PRO6 | M | GLN219 | 3.99 | Hydrogen bond |
| Chain AN↔Chain M | AN | PRO6 | M | ASN176 | 3.22 | Contact |
| Chain AN↔Chain M | AN | PRO6 | M | GLN269 | 3.95 | Contact |
| Chain AN↔Chain M | AN | PRO6 | M | TYR266 |  | Hydrophobic |
| Chain AN↔Chain M | AN | GLY7 | M | ARG274 | 3.27 | Contact |
| Chain AN↔Chain M | AN | GLY7 | M | GLN269 | 3.86 | Hydrogen bond |
| Chain AN↔Chain M | AN | ARG8 | M | GLN219 | 3.78 | Contact |
| Chain AN↔Chain M | AN | ARG8 | M | ARG274 | 3.98 | Hydrogen bond |
| Chain AN↔Chain M | AN | ARG8 | M | GLU316 | 3.26 | Contact |
| Chain AN↔Chain M | AN | ARG8 | M | THR334 |  | Hydrophobic |
| Chain AN↔Chain M | AN | ALA9 | M | GLN219 | 3.92 | Hydrogen bond |
| Chain AN↔Chain M | AN | ALA9 | M | ASP216 | 3.92 | Hydrogen bond |
| Chain AN↔Chain M | AN | ALA9 | M | SER218 | 3.22 | Contact |
| Chain AN↔Chain M | AN | PRO10 | M | GLN219 | 3.51 | Contact |
| Chain AN↔Chain M | AN | ARG11 | M | ASP278 | 3.39 | Contact |
| Chain AN↔Chain M | AN | ARG11 | M | ASP276 | 3.51 | Contact |
| Chain AN↔Chain M | AN | ASP22 | M | LYS172 | 3.59 | Salt bridge (Electrostatic, Hydrogen bond) |
| Chain AN↔Chain M | AN | ARG25 | M | GLN169 | 3.55 | Contact |
| Chain AN↔Chain M | AN | ARG25 | M | SER109 | 3.94 | Hydrogen bond |
| Chain AN↔Chain M | AN | ARG25 | M | MET166 | 3.37 | Contact |
| Chain AN↔Chain M | AN | ARG25 | M | ASP168 | 3.77 | Contact |
| Chain AN↔Chain M | AN | ALA26 | M | GLN169 | 3.63 | Hydrogen bond |
| Chain AN↔Chain M | AN | ARG31 | M | GLN165 | 3.32 | Contact |
| Chain AN↔Chain M | AN | ARG31 | M | HIS159 |  | Hydrophobic |
| Chain AN↔Chain M | AN | ARG34 | M | ASN249 | 3.81 | Contact |
| Chain AN↔Chain M | AN | ARG34 | M | VAL228 | 3.80 | Hydrogen bond |
| Chain AN↔Chain M | AN | ARG34 | M | ARG227 |  | Hydrophobic |
| Chain AN↔Chain M | AN | THR39 | M | PRO229 |  | Hydrophobic |
| Chain AN↔Chain M | AN | THR39 | M | GLY230 | 3.63 | Contact |
| Chain AN↔Chain M | AN | SER41 | M | PRO229 |  | Hydrophobic |
| Chain AN↔Chain M | AN | ILE45 | M | ARG118 | 3.96 | Contact |
| Chain AN↔Chain M | AN | ARG50 | M | ILE253 | 3.23 | Contact |
| Chain AN↔Chain M | AN | MET52 | M | GLY230 |  | Hydrophobic |
| Chain AN↔Chain M | AN | PRO54 | M | GLU232 | 3.60 | Contact |
| Chain AN↔Chain N | AN | GLY36 | N | GLU164 | 3.77 | Contact |
| Chain AN↔Chain N | AN | PRO37 | N | GLU164 | 3.95 | Contact |
| Chain AN↔Chain O | AN | ASN29 | O | ASN249 | 3.53 | Hydrogen bond |

| **Interface** | **Chain1** | **gp36** | **Chain2** | **gp29** | **Disatnce (Å)** | **Bond type** |
| --- | --- | --- | --- | --- | --- | --- |
| Chain AX↔Chain M | AX | THR58 | M | LEU352 |  | Hydrophobic |
| Chain AX↔Chain M | AX | PRO102 | M | GLY353 | 3.96 | Hydrogen bond |
| Chain AX↔Chain M | AX | SER103 | M | GLY353 | 3.73 | Contact |
| Chain AX↔Chain M | AX | SER103 | M | LEU356 | 3.96 | Contact |
| Chain AX↔Chain M | AX | SER103 | M | GLY354 | 3.24 | Hydrogen bond |
| Chain AX↔Chain M | AX | ALA104 | M | LEU356 | 3.49 | Contact |
| Chain AX↔Chain M | AX | ASP105 | M | GLN360 | 3.85 | Hydrogen bond |
| Chain AX↔Chain M | AX | ASP105 | M | LEU356 |  | Hydrophobic |
| Chain AX↔Chain M | AX | TYR106 | M | LEU357 |  | Hydrophobic |
| Chain AX↔Chain M | AX | TYR106 | M | PRO358 | 3.81 | Contact |
| Chain AX↔Chain M | AX | TYR106 | M | LEU356 | 3.55 | Contact |
| Chain AX↔Chain M | AX | HIS158 | M | GLN355 | 3.94 | Contact |
| Chain AX↔Chain M | AX | HIS158 | M | GLY353 | 3.90 | Contact |
| Chain AX↔Chain M | AX | ARG160 | M | GLN355 | 3.23 | Contact |
| Chain AX↔Chain M | AX | ARG160 | M | LEU356 | 3.08 | Hydrogen bond |
| Chain AY↔Chain M | AY | ARG23 | M | ASP344 | 3.49 | Contact |
| Chain AY↔Chain M | AY | ARG23 | M | THR343 | 3.94 | Hydrogen bond |
| Chain AY↔Chain M | AY | VAL29 | M | THR345 | 3.88 | Contact |
| Chain AY↔Chain M | AY | LEU30 | M | GLU346 | 3.50 | Hydrogen bond |
| Chain AY↔Chain M | AY | SER31 | M | GLU346 | 3.41 | Contact |
| Chain AY↔Chain M | AY | GLU32 | M | GLU346 | 3.98 | Contact |
| Chain AY↔Chain M | AY | GLU32 | M | GLY347 | 3.31 | Contact |
| Chain AY↔Chain M | AY | GLN33 | M | VAL256 | 3.70 | Hydrogen bond |
| Chain AY↔Chain M | AY | GLN33 | M | SER257 | 3.84 | Contact |
| Chain AY↔Chain M | AY | GLN33 | M | ARG264 | 3.93 | Hydrogen bond |
| Chain AY↔Chain M | AY | GLN33 | M | ALA260 | 3.67 | Contact |
| Chain AY↔Chain M | AY | PHE34 | M | VAL256 | 3.84 | Contact |
| Chain AY↔Chain M | AY | PHE34 | M | GLN360 | 3.75 | Contact |
| Chain AY↔Chain M | AY | GLU36 | M | LEU357 |  | Hydrophobic |
| Chain AY↔Chain M | AY | ASP54 | M | ASP255 | 3.55 | Contact |
| Chain AY↔Chain M | AY | GLY55 | M | SER257 |  | Hydrophobic |
| Chain AY↔Chain M | AY | ASP56 | M | SER257 | 3.53 | Contact |
| Chain AY↔Chain M | AY | ASP56 | M | ARG261 | 3.41 | Salt bridge (Electrostatic, Hydrogen bond) |
| Chain AY↔Chain M | AY | ASP56 | M | ASP157 | 3.62 | Hydrogen bond |
| Chain AY↔Chain M | AY | THR58 | M | ARG155 | 3.73 | Contact |
| Chain AY↔Chain M | AY | THR58 | M | ARG261 | 3.93 | Contact |
| Chain AY↔Chain M | AY | THR58 | M | GLU346 | 3.77 | Hydrogen bond |
| Chain AY↔Chain M | AY | HIS60 | M | ARG155 | 3.60 | Contact |
| Chain AY↔Chain M | AY | HIS60 | M | PRO151 | 3.83 | Hydrogen bond |
| Chain AY↔Chain M | AY | ASP62 | M | PRO151 |  | Hydrophobic |
| Chain AY↔Chain M | AY | ASP62 | M | GLU152 | 3.92 | Hydrogen bond |
| Chain AY↔Chain M | AY | ASP62 | M | ARG195 | 3.43 | Salt bridge (Electrostatic, Hydrogen bond) |
| Chain AY↔Chain M | AY | LYS100 | M | ARG155 | 3.16 | Hydrogen bond |
| Chain AY↔Chain M | AY | ALA101 | M | ARG155 | 3.97 | Contact |
| Chain AY↔Chain M | AY | ALA101 | M | TRP126 |  | Hydrophobic |
| Chain AY↔Chain M | AY | PRO102 | M | ARG155 | 3.45 | Contact |
| Chain AY↔Chain M | AY | PRO102 | M | ALA121 | 3.81 | Hydrogen bond |
| Chain AY↔Chain M | AY | SER103 | M | ASP120 | 3.98 | Contact |
| Chain AY↔Chain M | AY | HIS158 | M | ALA121 | 3.38 | Contact |
| Chain AY↔Chain M | AY | ARG160 | M | ASP120 | 3.90 | Contact |
| Chain AY↔Chain M | AY | ARG189 | M | PRO358 |  | Hydrophobic |
| Chain AY↔Chain M | AY | TRP190 | M | GLY359 | 3.46 | Contact |
| Chain AY↔Chain M | AY | TRP190 | M | LEU357 |  | Hydrophobic |
| Chain AY↔Chain M | AY | TRP190 | M | PRO358 | 3.43 | Contact |
| Chain AY↔Chain M | AY | TRP190 | M | GLN360 | 3.99 | Contact |

**Supplementary Tables 5c**

**gp29 (BHP) chain M interactions (Intra)**

| **Interface** | **Chain1** | **gp29** | **Chain2** | **gp29** | **Disatnce (Å)** | **Bond type** |
| --- | --- | --- | --- | --- | --- | --- |
| Chain M↔Chain N | M | ASP209 | N | ARG95 | 3.99 | Contact |
| Chain M↔Chain N | M | ASP209 | N | ASN93 | 3.73 | Hydrogen bond |
| Chain M↔Chain N | M | ILE211 | N | ASN93 | 3.93 | Hydrogen bond |
| Chain M↔Chain N | M | ILE211 | N | ALA92 | 3.43 | Hydrogen bond |
| Chain M↔Chain N | M | SER212 | N | ASN93 | 4.00 | Hydrogen bond |
| Chain M↔Chain N | M | SER212 | N | ALA92 | 3.47 | Contact |
| Chain M↔Chain N | M | ILE213 | N | VAL91 | 3.43 | Contact |
| Chain M↔Chain N | M | ILE213 | N | ALA92 | 3.15 | Hydrogen bond |
| Chain M↔Chain N | M | ILE213 | N | SER90 | 3.22 | Hydrogen bond |
| Chain M↔Chain N | M | ILE214 | N | SER90 | 3.45 | Contact |
| Chain M↔Chain N | M | ILE214 | N | VAL91 |  | Hydrophobic |
| Chain M↔Chain N | M | ARG215 | N | SER90 | 2.96 | Hydrogen bond |
| Chain M↔Chain N | M | ARG215 | N | LYS89 | 3.64 | Contact |
| Chain M↔Chain N | M | ARG215 | N | PHE88 | 3.77 | Hydrogen bond |
| Chain M↔Chain N | M | ARG215 | N | PRO66 | 3.28 | Contact |
| Chain M↔Chain N | M | ARG215 | N | ILE64 | 3.87 | Contact |
| Chain M↔Chain N | M | ARG215 | N | ALA63 |  | Hydrophobic |
| Chain M↔Chain N | M | ASP216 | N | PHE88 | 3.96 | Contact |
| Chain M↔Chain N | M | GLY217 | N | PHE88 | 3.87 | Contact |
| Chain M↔Chain N | M | GLY217 | N | TRP67 | 3.41 | Contact |
| Chain M↔Chain N | M | SER218 | N | PHE88 |  | Hydrophobic |
| Chain M↔Chain N | M | SER218 | N | ARG110 | 3.49 | Contact |
| Chain M↔Chain N | M | PHE221 | N | ARG110 |  | Hydrophobic |
| Chain M↔Chain N | M | ASP223 | N | ARG112 | 3.42 | Salt bridge (Electrostatic, Hydrogen bond) |
| Chain M↔Chain N | M | LEU225 | N | ARG112 | 3.87 | Contact |
| Chain M↔Chain N | M | ARG227 | N | GLU164 | 3.83 | Salt bridge (Electrostatic, Hydrogen bond) |
| Chain M↔Chain N | M | ARG227 | N | ASP163 | 3.44 | Salt bridge (Electrostatic, Hydrogen bond) |
| Chain M↔Chain N | M | ARG234 | N | ARG112 | 3.93 | Contact |
| Chain M↔Chain N | M | GLY241 | N | TRP67 | 3.38 | Contact |
| Chain M↔Chain N | M | GLY241 | N | LEU68 |  | Hydrophobic |
| Chain M↔Chain N | M | GLY241 | N | LYS20 |  | Hydrophobic |
| Chain M↔Chain N | M | ASN243 | N | GLN139 | 3.63 | Contact |
| Chain M↔Chain N | M | LEU244 | N | ARG110 | 3.38 | Contact |
| Chain M↔Chain N | M | LEU244 | N | TRP67 |  | Hydrophobic |
| Chain M↔Chain N | M | LEU244 | N | TYR107 |  | Hydrophobic |
| Chain M↔Chain N | M | GLU245 | N | ARG112 | 3.53 | Contact |
| Chain M↔Chain N | M | GLU245 | N | ARG110 | 3.81 | Contact |
| Chain M↔Chain N | M | GLU245 | N | ARG138 | 3.47 | Contact |
| Chain M↔Chain N | M | GLU245 | N | THR111 | 3.75 | Contact |
| Chain M↔Chain N | M | ILE247 | N | ARG112 |  | Hydrophobic |
| Chain M↔Chain N | M | VAL273 | N | GLN65 | 3.14 | Contact |
| Chain M↔Chain N | M | PRO280 | N | ASN93 | 3.61 | Contact |
| Chain M↔Chain N | M | GLN307 | N | ALA92 | 3.84 | Contact |
| Chain M↔Chain N | M | GLN307 | N | ASN93 | 3.96 | Hydrogen bond |
| Chain M↔Chain N | M | GLN307 | N | VAL61 |  | Hydrophobic |
| Chain M↔Chain N | M | GLN307 | N | LYS94 | 3.05 | Hydrogen bond |
| Chain M↔Chain N | M | GLY308 | N | VAL61 | 3.83 | Contact |
| Chain M↔Chain O | M | VAL61 | O | GLY308 | 3.93 | Contact |
| Chain M↔Chain O | M | VAL61 | O | GLN307 |  | Hydrophobic |
| Chain M↔Chain O | M | ALA63 | O | ARG215 | 3.87 | Contact |
| Chain M↔Chain O | M | ILE64 | O | ARG215 | 3.33 | Hydrogen bond |
| Chain M↔Chain O | M | GLN65 | O | VAL273 | 3.12 | Contact |
| Chain M↔Chain O | M | PRO66 | O | ARG215 |  | Hydrophobic |
| Chain M↔Chain O | M | TRP67 | O | GLY241 | 3.27 | Contact |
| Chain M↔Chain O | M | TRP67 | O | ALA242 | 3.97 | Hydrogen bond |
| Chain M↔Chain O | M | TRP67 | O | GLY217 | 3.41 | Contact |
| Chain M↔Chain O | M | TRP67 | O | LEU244 |  | Hydrophobic |
| Chain M↔Chain O | M | LEU68 | O | GLY241 |  | Hydrophobic |
| Chain M↔Chain O | M | PHE88 | O | ARG215 | 3.84 | Hydrogen bond |
| Chain M↔Chain O | M | PHE88 | O | GLY217 | 3.47 | Hydrogen bond |
| Chain M↔Chain O | M | PHE88 | O | SER218 |  | Hydrophobic |
| Chain M↔Chain O | M | LYS89 | O | ARG215 | 3.87 | Contact |
| Chain M↔Chain O | M | SER90 | O | ARG215 | 3.55 | Hydrogen bond |
| Chain M↔Chain O | M | SER90 | O | ILE213 | 3.32 | Hydrogen bond |
| Chain M↔Chain O | M | SER90 | O | ILE214 | 3.44 | Contact |
| Chain M↔Chain O | M | VAL91 | O | ILE213 | 3.30 | Contact |
| Chain M↔Chain O | M | VAL91 | O | SER212 |  | Hydrophobic |
| Chain M↔Chain O | M | VAL91 | O | ILE214 |  | Hydrophobic |
| Chain M↔Chain O | M | ALA92 | O | ILE213 | 2.92 | Hydrogen bond |
| Chain M↔Chain O | M | ALA92 | O | GLN307 | 3.84 | Contact |
| Chain M↔Chain O | M | ALA92 | O | ILE211 | 3.40 | Hydrogen bond |
| Chain M↔Chain O | M | ALA92 | O | SER212 | 3.33 | Contact |
| Chain M↔Chain O | M | ASN93 | O | GLN307 | 3.99 | Hydrogen bond |
| Chain M↔Chain O | M | ASN93 | O | ILE211 | 3.83 | Contact |
| Chain M↔Chain O | M | ASN93 | O | ASP209 | 3.58 | Contact |
| Chain M↔Chain O | M | LYS94 | O | GLN307 | 3.85 | Contact |
| Chain M↔Chain O | M | ARG95 | O | ASP209 | 3.55 | Contact |
| Chain M↔Chain O | M | TYR107 | O | LEU244 |  | Hydrophobic |
| Chain M↔Chain O | M | ARG110 | O | GLU245 | 3.96 | Contact |
| Chain M↔Chain O | M | ARG110 | O | LEU244 |  | Hydrophobic |
| Chain M↔Chain O | M | ARG110 | O | SER218 | 3.41 | Contact |
| Chain M↔Chain O | M | ARG110 | O | PHE221 |  | Hydrophobic |
| Chain M↔Chain O | M | THR111 | O | GLU245 | 3.78 | Contact |
| Chain M↔Chain O | M | ARG112 | O | GLU245 | 2.94 | Salt bridge (Electrostatic, Hydrogen bond) |
| Chain M↔Chain O | M | ARG112 | O | LEU225 |  | Hydrophobic |
| Chain M↔Chain O | M | ARG112 | O | ILE247 |  | Hydrophobic |
| Chain M↔Chain O | M | ARG112 | O | ASP223 | 3.50 | Salt bridge (Electrostatic, Hydrogen bond) |
| Chain M↔Chain O | M | ARG112 | O | ARG234 | 3.21 | Hydrogen bond |
| Chain M↔Chain O | M | GLN139 | O | ASN243 | 3.76 | Contact |
| Chain M↔Chain O | M | ASP163 | O | ARG227 | 3.64 | Salt bridge (Electrostatic, Hydrogen bond) |
| Chain M↔Chain O | M | GLU164 | O | ARG227 | 3.98 | Contact |

**Supplementary Tables 5d**

**gp30 (CFP) chain AN /gp29 (BHP)/gp36 inter complex interaction**

| **Interface** | **Chain1** | **gp30** | **Chain2** | **gp29** | **Disatnce (Å)** | **Bond type** |
| --- | --- | --- | --- | --- | --- | --- |
| Chain AN↔Chain M | AN | SER2 | M | GLU316 | 3.08 | Hydrogen bond |
| Chain AN↔Chain M | AN | SER2 | M | ALA43 | 3.27 | Contact |
| Chain AN↔Chain M | AN | ILE4 | M | ALA43 |  | Hydrophobic |
| Chain AN↔Chain M | AN | ILE4 | M | LYS172 |  | Hydrophobic |
| Chain AN↔Chain M | AN | ALA5 | M | VAL175 |  | Hydrophobic |
| Chain AN↔Chain M | AN | PRO6 | M | GLN219 | 3.99 | Hydrogen bond |
| Chain AN↔Chain M | AN | PRO6 | M | ASN176 | 3.22 | Contact |
| Chain AN↔Chain M | AN | PRO6 | M | GLN269 | 3.95 | Contact |
| Chain AN↔Chain M | AN | PRO6 | M | TYR266 |  | Hydrophobic |
| Chain AN↔Chain M | AN | GLY7 | M | ARG274 | 3.27 | Contact |
| Chain AN↔Chain M | AN | GLY7 | M | GLN269 | 3.86 | Hydrogen bond |
| Chain AN↔Chain M | AN | ARG8 | M | GLN219 | 3.78 | Contact |
| Chain AN↔Chain M | AN | ARG8 | M | ARG274 | 3.98 | Hydrogen bond |
| Chain AN↔Chain M | AN | ARG8 | M | GLU316 | 3.26 | Contact |
| Chain AN↔Chain M | AN | ARG8 | M | THR334 |  | Hydrophobic |
| Chain AN↔Chain M | AN | ALA9 | M | GLN219 | 3.92 | Hydrogen bond |
| Chain AN↔Chain M | AN | ALA9 | M | ASP216 | 3.92 | Hydrogen bond |
| Chain AN↔Chain M | AN | ALA9 | M | SER218 | 3.22 | Contact |
| Chain AN↔Chain M | AN | PRO10 | M | GLN219 | 3.51 | Contact |
| Chain AN↔Chain M | AN | ARG11 | M | ASP278 | 3.39 | Contact |
| Chain AN↔Chain M | AN | ARG11 | M | ASP276 | 3.51 | Contact |
| Chain AN↔Chain M | AN | ASP22 | M | LYS172 | 3.59 | Salt bridge (Electrostatic, Hydrogen bond) |
| Chain AN↔Chain M | AN | ARG25 | M | GLN169 | 3.55 | Contact |
| Chain AN↔Chain M | AN | ARG25 | M | SER109 | 3.94 | Hydrogen bond |
| Chain AN↔Chain M | AN | ARG25 | M | MET166 | 3.37 | Contact |
| Chain AN↔Chain M | AN | ARG25 | M | ASP168 | 3.77 | Contact |
| Chain AN↔Chain M | AN | ALA26 | M | GLN169 | 3.63 | Hydrogen bond |
| Chain AN↔Chain M | AN | ARG31 | M | GLN165 | 3.32 | Contact |
| Chain AN↔Chain M | AN | ARG31 | M | HIS159 |  | Hydrophobic |
| Chain AN↔Chain M | AN | ARG34 | M | ASN249 | 3.81 | Contact |
| Chain AN↔Chain M | AN | ARG34 | M | VAL228 | 3.80 | Hydrogen bond |
| Chain AN↔Chain M | AN | ARG34 | M | ARG227 |  | Hydrophobic |
| Chain AN↔Chain M | AN | THR39 | M | PRO229 |  | Hydrophobic |
| Chain AN↔Chain M | AN | THR39 | M | GLY230 | 3.63 | Contact |
| Chain AN↔Chain M | AN | SER41 | M | PRO229 |  | Hydrophobic |
| Chain AN↔Chain M | AN | ILE45 | M | ARG118 | 3.96 | Contact |
| Chain AN↔Chain M | AN | ARG50 | M | ILE253 | 3.23 | Contact |
| Chain AN↔Chain M | AN | MET52 | M | GLY230 |  | Hydrophobic |
| Chain AN↔Chain M | AN | PRO54 | M | GLU232 | 3.60 | Contact |

**Supplementary Tables 5d**

**gp30 (CFP) chain AN interactions (Intra)**

| **Interface** | **Chain1** | **gp30** | **Chain2** | **gp30** | **Disatnce (Å)** | **Bond type** |
| --- | --- | --- | --- | --- | --- | --- |
| Chain AN↔Chain AO | AN | TRP16 | AO | SER17 | 3.76 | Hydrogen bond |
| Chain AN↔Chain AO | AN | TRP16 | AO | VAL20 |  | Hydrophobic |
| Chain AN↔Chain AO | AN | VAL20 | AO | LEU24 |  | Hydrophobic |
| Chain AN↔Chain AO | AN | ARG23 | AO | LEU24 |  | Hydrophobic |
| Chain AN↔Chain AO | AN | ARG23 | AO | GLU28 | 3.86 | Contact |
| Chain AN↔Chain AO | AN | ARG23 | AO | ASN21 | 3.87 | Contact |
| Chain AN↔Chain AO | AN | ARG23 | AO | ARG25 | 3.15 | Hydrogen bond |
| Chain AN↔Chain AO | AN | LEU24 | AO | LEU24 |  | Hydrophobic |
| Chain AN↔Chain AO | AN | LEU27 | AO | GLU28 | 3.76 | Contact |
| Chain AN↔Chain AO | AN | LEU27 | AO | LEU24 |  | Hydrophobic |
| Chain AN↔Chain AO | AN | LEU27 | AO | LEU27 |  | Hydrophobic |
| Chain AN↔Chain AO | AN | ARG34 | AO | VAL33 | 3.64 | Contact |
| Chain AN↔Chain AO | AN | VAL35 | AO | ARG31 | 3.27 | Contact |
| Chain AN↔Chain AO | AN | VAL35 | AO | LEU40 | 3.68 | Contact |
| Chain AN↔Chain AO | AN | VAL35 | AO | VAL33 |  | Hydrophobic |
| Chain AN↔Chain AO | AN | VAL35 | AO | THR32 |  | Hydrophobic |
| Chain AN↔Chain AO | AN | VAL35 | AO | LEU49 |  | Hydrophobic |
| Chain AN↔Chain AO | AN | GLY36 | AO | ARG31 | 3.14 | Hydrogen bond |
| Chain AN↔Chain AO | AN | TRP38 | AO | LEU49 |  | Hydrophobic |
| Chain AN↔Chain AO | AN | TRP38 | AO | ALA48 | 4.00 | Contact |
| Chain AN↔Chain AO | AN | TRP38 | AO | GLY47 | 2.85 | Hydrogen bond |
| Chain AN↔Chain AO | AN | TRP38 | AO | THR42 | 3.74 | Contact |
| Chain AN↔Chain AO | AN | LEU40 | AO | LEU40 |  | Hydrophobic |
| Chain AN↔Chain AO | AN | ALA51 | AO | LEU49 |  | Hydrophobic |
| Chain AN↔Chain AO | AN | ARG53 | AO | GLY47 | 3.56 | Contact |
| Chain AN↔Chain AO | AN | VAL58 | AO | ASP61 |  | Hydrophobic |
| Chain AN↔Chain AO | AN | VAL58 | AO | GLY62 | 3.54 | Contact |
| Chain AN↔Chain AP | AN | SER17 | AP | TRP16 |  | Hydrophobic |
| Chain AN↔Chain AP | AN | ASN21 | AP | ARG23 | 3.86 | Contact |
| Chain AN↔Chain AP | AN | LEU24 | AP | ARG23 | 3.97 | Contact |
| Chain AN↔Chain AP | AN | LEU24 | AP | LEU27 |  | Hydrophobic |
| Chain AN↔Chain AP | AN | LEU24 | AP | LEU24 |  | Hydrophobic |
| Chain AN↔Chain AP | AN | ARG25 | AP | ARG23 | 3.83 | Hydrogen bond |
| Chain AN↔Chain AP | AN | LEU27 | AP | LEU27 | 3.82 | Contact |
| Chain AN↔Chain AP | AN | GLU28 | AP | ARG23 | 3.10 | Salt bridge (Electrostatic, Hydrogen bond) |
| Chain AN↔Chain AP | AN | GLU28 | AP | LEU27 | 3.79 | Contact |
| Chain AN↔Chain AP | AN | PRO30 | AP | ARG34 | 3.49 | Hydrogen bond |
| Chain AN↔Chain AP | AN | ARG31 | AP | GLY36 | 3.44 | Hydrogen bond |
| Chain AN↔Chain AP | AN | ARG31 | AP | VAL35 | 3.22 | Contact |
| Chain AN↔Chain AP | AN | THR32 | AP | VAL35 |  | Hydrophobic |
| Chain AN↔Chain AP | AN | VAL33 | AP | ARG34 | 3.81 | Contact |
| Chain AN↔Chain AP | AN | LEU40 | AP | VAL35 |  | Hydrophobic |
| Chain AN↔Chain AP | AN | THR42 | AP | GLY36 |  | Hydrophobic |
| Chain AN↔Chain AP | AN | THR42 | AP | PRO37 |  | Hydrophobic |
| Chain AN↔Chain AP | AN | THR42 | AP | TRP38 |  | Hydrophobic |
| Chain AN↔Chain AP | AN | GLY47 | AP | ARG53 | 3.36 | Contact |
| Chain AN↔Chain AP | AN | GLY47 | AP | TRP38 | 3.40 | Hydrogen bond |
| Chain AN↔Chain AP | AN | LEU49 | AP | TRP38 | 3.55 | Hydrogen bond |
| Chain AN↔Chain AP | AN | LEU49 | AP | ALA51 |  | Hydrophobic |
| Chain AN↔Chain AP | AN | ASP61 | AP | VAL58 | 3.58 | Contact |

**Supplementary Tables 5e**

**gp35 (fiber) chain AQ /gp28 (DTP)/gp40/gp41 inter complex interactions**

| **Interface** | **Chain1** | **gp35** | **Chain2** | **gp28** | **Disatnce (Å)** | **Bond type** |
| --- | --- | --- | --- | --- | --- | --- |
| Chain AQ↔Chain G | AQ | SER3 | G | GLN294 | 3.07 | Hydrogen bond |
| Chain AQ↔Chain G | AQ | SER3 | G | ARG347 | 3.84 | Contact |
| Chain AQ↔Chain G | AQ | PRO4 | G | GLN294 | 3.23 | Contact |
| Chain AQ↔Chain G | AQ | PRO4 | G | LYS297 | 3.59 | Hydrogen bond |
| Chain AQ↔Chain G | AQ | THR5 | G | LYS297 | 3.69 | Contact |
| Chain AQ↔Chain G | AQ | THR5 | G | VAL299 | 3.99 | Contact |
| Chain AQ↔Chain G | AQ | VAL6 | G | VAL299 | 3.65 | Contact |
| Chain AQ↔Chain G | AQ | VAL6 | G | TRP298 | 3.98 | Contact |
| Chain AQ↔Chain G | AQ | VAL6 | G | LYS297 | 3.30 | Hydrogen bond |
| Chain AQ↔Chain G | AQ | VAL6 | G | ILE296 |  | Hydrophobic |
| Chain AQ↔Chain G | AQ | CYS7 | G | VAL299 |  | Hydrophobic |
| Chain AQ↔Chain G | AQ | VAL8 | G | VAL299 | 3.41 | Hydrogen bond |
| Chain AQ↔Chain G | AQ | VAL14 | G | TRP298 | 3.80 | Contact |
| Chain AQ↔Chain G | AQ | GLY18 | G | TRP298 | 3.09 | Contact |
| Chain AQ↔Chain G | AQ | LEU20 | G | TRP298 |  | Hydrophobic |

| **Interface** | **Chain1** | **gp40** | **Chain2** | **gp35** | **Disatnce (Å)** | **Bond type** |
| --- | --- | --- | --- | --- | --- | --- |
| Chain AA↔Chain AQ | AA | ASP103 | AQ | ARG37 | 3.94 | Contact |
| Chain AA↔Chain AQ | AA | ASP103 | AQ | ILE35 | 3.51 | Contact |
| Chain AA↔Chain AQ | AA | ASN107 | AQ | ILE35 |  | Hydrophobic |
| Chain AA↔Chain AQ | AA | VAL109 | AQ | ILE35 | 3.40 | Contact |
| Chain AA↔Chain AQ | AA | GLU125 | AQ | ASN53 | 3.68 | Hydrogen bond |
| Chain AA↔Chain AQ | AA | THR126 | AQ | LEU56 | 3.76 | Contact |
| Chain AA↔Chain AQ | AA | ASP128 | AQ | ASN59 | 3.93 | Contact |
| Chain AA↔Chain AQ | AA | PRO129 | AQ | LEU56 |  | Hydrophobic |
| Chain AA↔Chain AQ | AA | PRO129 | AQ | ASN59 |  | Hydrophobic |
| Chain AA↔Chain AQ | AA | PRO129 | AQ | GLY39 | 4.00 | Contact |
| Chain AA↔Chain AQ | AA | PRO129 | AQ | LEU57 | 3.24 | Contact |
| Chain AA↔Chain AQ | AA | ASN130 | AQ | ASN59 | 3.31 | Hydrogen bond |
| Chain AA↔Chain AQ | AA | ASN130 | AQ | ARG37 | 3.65 | Hydrogen bond |

| **Interface** | **Chain1** | **gp41** | **Chain2** | **gp35** | **Disatnce (Å)** | **Bond type** |
| --- | --- | --- | --- | --- | --- | --- |
| Chain AM↔Chain AQ | AM | ARG28 | AQ | GLY39 | 3.24 | Hydrogen bond |
| Chain AM↔Chain AQ | AM | GLY29 | AQ | GLY39 | 3.81 | Contact |
| Chain AM↔Chain AQ | AM | THR30 | AQ | GLY39 | 3.24 | Hydrogen bond |
| Chain AM↔Chain AQ | AM | THR30 | AQ | ALA40 | 3.24 | Contact |
| Chain AM↔Chain AQ | AM | GLU31 | AQ | GLY39 | 3.43 | Hydrogen bond |
| Chain AM↔Chain AQ | AM | GLU31 | AQ | SER38 | 3.43 | Hydrogen bond |
| Chain AM↔Chain AQ | AM | GLU31 | AQ | ALA40 | 3.75 | Hydrogen bond |
| Chain AM↔Chain AQ | AM | GLU31 | AQ | ASP41 | 3.20 | Hydrogen bond |
| Chain AM↔Chain AQ | AM | ASP44 | AQ | THR43 | 3.56 | Contact |
| Chain AM↔Chain AQ | AM | GLU88 | AQ | VAL131 |  | Hydrophobic |
| Chain AM↔Chain AQ | AM | GLY89 | AQ | THR130 | 3.93 | Contact |
| Chain AM↔Chain AQ | AM | GLY90 | AQ | THR130 |  | Hydrophobic |
| Chain AM↔Chain AQ | AM | VAL91 | AQ | THR130 | 3.90 | Contact |
| Chain AM↔Chain AQ | AM | VAL213 | AQ | ALA183 |  | Hydrophobic |
| Chain AM↔Chain AQ | AM | GLY214 | AQ | LYS44 | 3.35 | Contact |
| Chain AM↔Chain AQ | AM | GLY214 | AQ | PRO184 | 3.18 | Contact |
| Chain AM↔Chain AQ | AM | GLY214 | AQ | SER185 |  | Hydrophobic |
| Chain AM↔Chain AQ | AM | ASN215 | AQ | LYS44 | 3.75 | Contact |
| Chain AM↔Chain AQ | AM | ASN215 | AQ | THR43 | 3.68 | Contact |
| Chain AM↔Chain AQ | AM | ASN215 | AQ | SER185 | 3.66 | Hydrogen bond |
| Chain AM↔Chain AQ | AM | ASP223 | AQ | LYS181 | 3.61 | Contact |
| Chain AM↔Chain AQ | AM | ARG251 | AQ | LEU46 |  | Hydrophobic |
| Chain AM↔Chain AQ | AM | ILE252 | AQ | LEU46 | 3.88 | Contact |
| Chain AM↔Chain AQ | AM | ALA253 | AQ | LEU46 |  | Hydrophobic |
| Chain AM↔Chain AQ | AM | GLU254 | AQ | ASN177 | 3.76 | Contact |
| Chain AM↔Chain AQ | AM | GLU254 | AQ | PRO184 |  | Hydrophobic |
| Chain AM↔Chain AQ | AM | GLU254 | AQ | LYS44 | 3.32 | Contact |
| Chain AM↔Chain AQ | AM | LEU255 | AQ | ASN177 | 3.95 | Contact |
| Chain AM↔Chain AQ | AM | GLY256 | AQ | ASN177 | 3.53 | Hydrogen bond |
| Chain AM↔Chain AQ | AM | ALA310 | AQ | LEU46 |  | Hydrophobic |
| Chain AM↔Chain AQ | AM | GLY364 | AQ | VAL131 | 3.96 | Contact |
| Chain AM↔Chain AQ | AM | SER365 | AQ | GLU133 | 3.75 | Contact |
| Chain AM↔Chain AQ | AM | ARG366 | AQ | LYS181 | 3.76 | Contact |
| Chain AM↔Chain AQ | AM | ARG366 | AQ | ASN182 | 3.99 | Contact |
| Chain AM↔Chain AQ | AM | PHE368 | AQ | ASN182 |  | Hydrophobic |
| Chain AM↔Chain AQ | AM | ASP373 | AQ | LYS44 | 3.22 | Contact |

**Supplementary Tables 5e**

**gp35 (fiber) chain AQ interactions (Intra)**

| **Interface** | **Chain1** | **gp35** | **Chain2** | **gp36** | **Disatnce (Å)** | **Bond type** |
| --- | --- | --- | --- | --- | --- | --- |
| Chain AQ↔Chain AW | AQ | PRO4 | AW | LEU4 |  | Hydrophobic |
| Chain AQ↔Chain AW | AQ | THR5 | AW | SER3 | 3.53 | Contact |
| Chain AQ↔Chain AW | AQ | THR5 | AW | LEU4 | 3.04 | Hydrogen bond |
| Chain AQ↔Chain AW | AQ | VAL6 | AW | SER3 |  | Hydrophobic |
| Chain AQ↔Chain AW | AQ | VAL6 | AW | ILE19 |  | Hydrophobic |
| Chain AQ↔Chain AW | AQ | VAL6 | AW | LEU4 | 3.78 | Contact |
| Chain AQ↔Chain AW | AQ | VAL6 | AW | LEU6 |  | Hydrophobic |
| Chain AQ↔Chain AW | AQ | CYS7 | AW | SER3 | 3.03 | Hydrogen bond |
| Chain AQ↔Chain AW | AQ | CYS7 | AW | GLY18 | 3.29 | Contact |
| Chain AQ↔Chain AW | AQ | CYS7 | AW | ILE19 | 2.92 | Hydrogen bond |
| Chain AQ↔Chain AW | AQ | VAL8 | AW | ILE19 | 3.68 | Contact |
| Chain AQ↔Chain AW | AQ | ALA9 | AW | ILE19 | 2.94 | Hydrogen bond |
| Chain AQ↔Chain AW | AQ | ALA9 | AW | GLY20 |  | Hydrophobic |
| Chain AQ↔Chain AW | AQ | HIS11 | AW | VAL21 |  | Hydrophobic |
| Chain AQ↔Chain AW | AQ | HIS11 | AW | LEU26 |  | Hydrophobic |
| Chain AQ↔Chain AW | AQ | SER26 | AW | LEU26 | 3.30 | Contact |
| Chain AQ↔Chain AW | AQ | PRO28 | AW | PRO27 |  | Hydrophobic |
| Chain AQ↔Chain AW | AQ | ARG75 | AW | LEU72 | 3.40 | Contact |
| Chain AQ↔Chain AW | AQ | ARG75 | AW | GLN143 | 3.56 | Hydrogen bond |
| Chain AQ↔Chain AW | AQ | ARG75 | AW | TRP145 | 3.48 | Contact |
| Chain AQ↔Chain AW | AQ | ARG80 | AW | ASP140 | 3.20 | Contact |
| Chain AQ↔Chain AW | AQ | ARG80 | AW | ASP141 | 3.46 | Contact |
| Chain AQ↔Chain AW | AQ | ARG83 | AW | ASP140 | 3.36 | Contact |
| Chain AQ↔Chain AW | AQ | ASN117 | AW | PRO77 | 3.93 | Contact |
| Chain AQ↔Chain AW | AQ | SER118 | AW | ASP141 | 3.24 | Contact |
| Chain AQ↔Chain AW | AQ | SER118 | AW | PRO77 |  | Hydrophobic |
| Chain AQ↔Chain AW | AQ | SER118 | AW | ASP140 | 3.27 | Contact |
| Chain AQ↔Chain AW | AQ | GLN119 | AW | ASP138 | 3.88 | Hydrogen bond |
| Chain AQ↔Chain AW | AQ | GLN119 | AW | GLY139 | 3.17 | Contact |
| Chain AQ↔Chain AW | AQ | GLN119 | AW | ASP140 | 3.25 | Hydrogen bond |
| Chain AQ↔Chain AW | AQ | GLN119 | AW | ARG189 | 3.82 | Hydrogen bond |
| Chain AQ↔Chain AW | AQ | GLN119 | AW | SER79 | 2.90 | Hydrogen bond |
| Chain AQ↔Chain AW | AQ | ALA120 | AW | ASP140 |  | Hydrophobic |
| Chain AQ↔Chain AW | AQ | ALA120 | AW | ASP138 | 3.35 | Contact |
| Chain AQ↔Chain AW | AQ | GLY121 | AW | ASP138 | 3.71 | Contact |
| Chain AQ↔Chain AW | AQ | GLY121 | AW | LEU137 | 3.65 | Contact |
| Chain AQ↔Chain AW | AQ | SER122 | AW | PHE136 | 3.23 | Contact |
| Chain AQ↔Chain AW | AQ | ALA123 | AW | PHE136 | 3.88 | Contact |
| Chain AQ↔Chain AW | AQ | ALA123 | AW | ARG134 | 3.85 | Hydrogen bond |
| Chain AQ↔Chain AW | AQ | ALA123 | AW | TYR135 | 3.93 | Contact |
| Chain AQ↔Chain AW | AQ | GLY124 | AW | ARG134 | 3.94 | Contact |
| Chain AQ↔Chain AW | AQ | GLY124 | AW | LEU118 |  | Hydrophobic |
| Chain AQ↔Chain AW | AQ | ASP125 | AW | PHE132 | 3.84 | Contact |
| Chain AQ↔Chain AW | AQ | ASP125 | AW | ARG134 | 3.98 | Contact |
| Chain AQ↔Chain AW | AQ | ASP125 | AW | GLY133 | 3.19 | Contact |
| Chain AQ↔Chain AW | AQ | ILE126 | AW | PHE132 |  | Hydrophobic |
| Chain AQ↔Chain AW | AQ | ILE126 | AW | GLY133 | 3.92 | Contact |
| Chain AQ↔Chain AW | AQ | GLY127 | AW | PHE132 | 4.00 | Contact |
| Chain AQ↔Chain AW | AQ | PHE139 | AW | LEU118 |  | Hydrophobic |
| Chain AQ↔Chain AW | AQ | HIS141 | AW | TYR135 | 3.67 | Hydrogen bond |
| Chain AQ↔Chain AW | AQ | TRP143 | AW | ASP140 | 3.30 | Hydrogen bond |
| Chain AQ↔Chain AW | AQ | TRP143 | AW | GLY139 |  | Hydrophobic |
| Chain AQ↔Chain AW | AQ | TRP143 | AW | PHE114 |  | Hydrophobic |
| Chain AQ↔Chain AW | AQ | ASN146 | AW | ASP141 | 3.93 | Contact |
| Chain AQ↔Chain AW | AQ | ASN146 | AW | ASP140 | 3.90 | Hydrogen bond |
| Chain AQ↔Chain AW | AQ | THR147 | AW | ASP141 | 3.94 | Hydrogen bond |
| Chain AQ↔Chain AW | AQ | THR147 | AW | GLN143 | 3.21 | Hydrogen bond |
| Chain AQ↔Chain AW | AQ | THR147 | AW | SER142 | 3.74 | Contact |
| Chain AQ↔Chain AW | AQ | SER148 | AW | ASP141 | 4.00 | Hydrogen bond |
| Chain AQ↔Chain AW | AQ | SER148 | AW | HIS74 |  | Hydrophobic |
| Chain AQ↔Chain AW | AQ | ASP149 | AW | GLN143 | 3.25 | Hydrogen bond |
| Chain AQ↔Chain AW | AQ | ASP149 | AW | LEU72 | 3.52 | Contact |
| Chain AQ↔Chain AW | AQ | ASP149 | AW | HIS74 | 3.58 | Contact |
| Chain AQ↔Chain AW | AQ | ASP149 | AW | ARG192 | 3.88 | Salt bridge (Electrostatic, Hydrogen bond) |
| Chain AQ↔Chain AW | AQ | GLU150 | AW | ARG192 | 2.93 | Salt bridge (Electrostatic, Hydrogen bond) |
| Chain AQ↔Chain AW | AQ | TRP151 | AW | VAL29 |  | Hydrophobic |
| Chain AQ↔Chain AW | AQ | TRP151 | AW | LEU196 |  | Hydrophobic |
| Chain AQ↔Chain AW | AQ | MET200 | AW | PRO27 | 3.80 | Contact |
| Chain AQ↔Chain AW | AQ | PRO201 | AW | LEU26 |  | Hydrophobic |
| Chain AQ↔Chain AW | AQ | GLU202 | AW | LEU26 | 3.94 | Contact |
| Chain AQ↔Chain AW | AQ | PRO203 | AW | LEU26 | 3.70 | Contact |
| Chain AQ↔Chain AW | AQ | PRO203 | AW | ARG23 |  | Hydrophobic |
| Chain AQ↔Chain AW | AQ | ARG206 | AW | ASN17 | 3.40 | Contact |
| Chain AQ↔Chain AW | AQ | VAL207 | AW | ASN17 | 3.15 | Hydrogen bond |
| Chain AQ↔Chain AW | AQ | VAL207 | AW | ASN15 |  | Hydrophobic |
| Chain AQ↔Chain AW | AQ | VAL207 | AW | LEU13 |  | Hydrophobic |
| Chain AQ↔Chain AW | AQ | ILE208 | AW | ARG23 | 3.79 | Hydrogen bond |
| Chain AQ↔Chain AW | AQ | GLY209 | AW | LEU13 |  | Hydrophobic |

| **Interface** | **Chain1** | **gp35** | **Chain2** | **gp37** | **Disatnce (Å)** | **Bond type** |
| --- | --- | --- | --- | --- | --- | --- |
| Chain AQ↔Chain BC | AQ | LEU12 | BC | PHE10 |  | Hydrophobic |
| Chain AQ↔Chain BC | AQ | GLY18 | BC | PRO4 |  | Hydrophobic |
| Chain AQ↔Chain BC | AQ | VAL19 | BC | PRO4 | 3.77 | Contact |
| Chain AQ↔Chain BC | AQ | VAL19 | BC | ILE5 |  | Hydrophobic |
| Chain AQ↔Chain BC | AQ | VAL19 | BC | ASN6 | 3.60 | Contact |
| Chain AQ↔Chain BC | AQ | LEU20 | BC | ASN6 | 3.46 | Contact |
| Chain AQ↔Chain BC | AQ | LEU20 | BC | PHE10 | 3.80 | Contact |
| Chain AQ↔Chain BC | AQ | LEU20 | BC | PRO4 | 3.28 | Hydrogen bond |
| Chain AQ↔Chain BC | AQ | LEU20 | BC | ILE5 | 3.93 | Contact |
| Chain AQ↔Chain BC | AQ | SER21 | BC | HIS9 | 3.67 | Contact |
| Chain AQ↔Chain BC | AQ | SER21 | BC | ASN6 |  | Hydrophobic |
| Chain AQ↔Chain BC | AQ | SER21 | BC | PHE10 |  | Hydrophobic |
| Chain AQ↔Chain BC | AQ | LEU22 | BC | HIS9 | 3.09 | Hydrogen bond |
| Chain AQ↔Chain BC | AQ | LEU22 | BC | PHE10 | 3.70 | Contact |
| Chain AQ↔Chain BC | AQ | LEU22 | BC | ILE206 | 3.52 | Contact |
| Chain AQ↔Chain BC | AQ | LEU22 | BC | MET24 | 3.98 | Contact |
| Chain AQ↔Chain BC | AQ | ALA23 | BC | ILE206 |  | Hydrophobic |
| Chain AQ↔Chain BC | AQ | PRO24 | BC | ILE206 | 3.67 | Contact |
| Chain AQ↔Chain BC | AQ | SER26 | BC | GLN25 | 3.79 | Hydrogen bond |
| Chain AQ↔Chain BC | AQ | VAL27 | BC | ILE206 |  | Hydrophobic |
| Chain AQ↔Chain BC | AQ | VAL27 | BC | GLN25 | 3.60 | Contact |
| Chain AQ↔Chain BC | AQ | VAL27 | BC | MET24 | 3.54 | Contact |
| Chain AQ↔Chain BC | AQ | VAL27 | BC | PRO204 |  | Hydrophobic |
| Chain AQ↔Chain BC | AQ | PRO28 | BC | VAL203 | 3.16 | Contact |
| Chain AQ↔Chain BC | AQ | ASN30 | BC | TRP153 | 3.80 | Contact |
| Chain AQ↔Chain BC | AQ | ASN30 | BC | GLY152 | 3.64 | Contact |
| Chain AQ↔Chain BC | AQ | ASP33 | BC | ALA151 |  | Hydrophobic |
| Chain AQ↔Chain BC | AQ | ASP33 | BC | GLY152 | 4.00 | Contact |
| Chain AQ↔Chain BC | AQ | ILE35 | BC | GLU149 | 3.57 | Contact |
| Chain AQ↔Chain BC | AQ | ILE35 | BC | ALA151 |  | Hydrophobic |
| Chain AQ↔Chain BC | AQ | ILE35 | BC | PRO148 | 3.60 | Contact |
| Chain AQ↔Chain BC | AQ | THR79 | BC | PRO145 | 3.89 | Contact |
| Chain AQ↔Chain BC | AQ | THR79 | BC | PRO148 |  | Hydrophobic |
| Chain AQ↔Chain BC | AQ | ARG81 | BC | ALA111 | 3.95 | Contact |
| Chain AQ↔Chain BC | AQ | PHE82 | BC | ALA111 | 3.68 | Contact |
| Chain AQ↔Chain BC | AQ | PHE82 | BC | ARG113 | 3.46 | Contact |
| Chain AQ↔Chain BC | AQ | PHE82 | BC | SER112 |  | Hydrophobic |
| Chain AQ↔Chain BC | AQ | ILE126 | BC | MET120 |  | Hydrophobic |
| Chain AQ↔Chain BC | AQ | PRO136 | BC | ASP119 | 3.96 | Contact |
| Chain AQ↔Chain BC | AQ | PRO136 | BC | MET120 | 3.43 | Contact |
| Chain AQ↔Chain BC | AQ | PRO136 | BC | GLY124 |  | Hydrophobic |
| Chain AQ↔Chain BC | AQ | PRO136 | BC | LEU126 | 4.00 | Contact |
| Chain AQ↔Chain BC | AQ | GLY137 | BC | ASP119 | 3.62 | Hydrogen bond |
| Chain AQ↔Chain BC | AQ | LYS138 | BC | ASP119 | 3.06 | Salt bridge (Electrostatic, Hydrogen bond) |
| Chain AQ↔Chain BC | AQ | LYS138 | BC | ALA118 | 3.79 | Contact |
| Chain AQ↔Chain BC | AQ | PHE139 | BC | GLY117 | 3.96 | Contact |
| Chain AQ↔Chain BC | AQ | TRP140 | BC | GLY117 | 3.86 | Contact |
| Chain AQ↔Chain BC | AQ | TRP140 | BC | CYS116 | 3.96 | Contact |
| Chain AQ↔Chain BC | AQ | TRP140 | BC | VAL88 |  | Hydrophobic |
| Chain AQ↔Chain BC | AQ | TRP140 | BC | ASP119 |  | Hydrophobic |
| Chain AQ↔Chain BC | AQ | TRP140 | BC | ALA118 | 3.71 | Contact |
| Chain AQ↔Chain BC | AQ | HIS141 | BC | GLU137 | 3.88 | Contact |
| Chain AQ↔Chain BC | AQ | HIS141 | BC | GLY115 | 3.81 | Contact |
| Chain AQ↔Chain BC | AQ | TRP142 | BC | ARG113 |  | Hydrophobic |
| Chain AQ↔Chain BC | AQ | TRP142 | BC | VAL88 |  | Hydrophobic |
| Chain AQ↔Chain BC | AQ | TRP142 | BC | GLU137 | 3.91 | Hydrogen bond |
| Chain AQ↔Chain BC | AQ | TRP142 | BC | GLY115 | 3.29 | Hydrogen bond |
| Chain AQ↔Chain BC | AQ | TRP142 | BC | PHE114 | 3.87 | Contact |
| Chain AQ↔Chain BC | AQ | TRP142 | BC | TYR90 |  | Hydrophobic |
| Chain AQ↔Chain BC | AQ | TRP143 | BC | ARG113 | 3.34 | Hydrogen bond |
| Chain AQ↔Chain BC | AQ | TRP143 | BC | MET139 | 3.97 | Contact |
| Chain AQ↔Chain BC | AQ | TRP143 | BC | ARG138 | 3.37 | Contact |
| Chain AQ↔Chain BC | AQ | TRP143 | BC | GLU137 | 3.16 | Contact |
| Chain AQ↔Chain BC | AQ | TRP143 | BC | PHE114 |  | Hydrophobic |
| Chain AQ↔Chain BC | AQ | GLY144 | BC | MET139 | 3.58 | Hydrogen bond |
| Chain AQ↔Chain BC | AQ | GLY144 | BC | ARG113 | 3.42 | Hydrogen bond |
| Chain AQ↔Chain BC | AQ | GLY144 | BC | SER112 |  | Hydrophobic |
| Chain AQ↔Chain BC | AQ | THR145 | BC | ALA111 | 3.54 | Contact |
| Chain AQ↔Chain BC | AQ | THR145 | BC | SER112 | 3.86 | Hydrogen bond |
| Chain AQ↔Chain BC | AQ | THR145 | BC | PHE144 |  | Hydrophobic |
| Chain AQ↔Chain BC | AQ | THR145 | BC | VAL142 | 3.36 | Contact |
| Chain AQ↔Chain BC | AQ | ASN146 | BC | VAL142 |  | Hydrophobic |
| Chain AQ↔Chain BC | AQ | THR147 | BC | THR143 | 3.76 | Contact |
| Chain AQ↔Chain BC | AQ | THR147 | BC | PRO145 |  | Hydrophobic |
| Chain AQ↔Chain BC | AQ | ASN180 | BC | LEU126 | 3.56 | Contact |
| Chain AQ↔Chain BC | AQ | LYS181 | BC | GLY124 | 2.93 | Hydrogen bond |
| Chain AQ↔Chain BC | AQ | ALA183 | BC | LEU126 |  | Hydrophobic |
| Chain AQ↔Chain BC | AQ | TYR192 | BC | PRO148 |  | Hydrophobic |
| Chain AQ↔Chain BC | AQ | TYR192 | BC | GLU149 | 3.86 | Contact |
| Chain AQ↔Chain BC | AQ | ARG194 | BC | GLY152 | 3.82 | Hydrogen bond |
| Chain AQ↔Chain BC | AQ | ARG194 | BC | PRO148 | 3.78 | Contact |
| Chain AQ↔Chain BC | AQ | ARG194 | BC | ARG150 | 3.86 | Hydrogen bond |
| Chain AQ↔Chain BC | AQ | ARG194 | BC | PRO145 | 3.39 | Contact |
| Chain AQ↔Chain BC | AQ | ARG194 | BC | LEU146 | 3.86 | Hydrogen bond |
| Chain AQ↔Chain BC | AQ | ARG194 | BC | ALA147 | 3.62 | Hydrogen bond |
| Chain AQ↔Chain BC | AQ | HIS198 | BC | TRP153 |  | Hydrophobic |

**Supplementary Tables 5f**

**gp36 (fiber) chain AW/gp28 (DTP)/gp29 (BHP) inter complex interaction**

| **Interface** | **Chain1** | **gp36** | **Chain2** | **gp28** | **Disatnce (Å)** | **Bond type** |
| --- | --- | --- | --- | --- | --- | --- |
| Chain AW↔Chain G | AW | SER2 | G | ASP394 | 3.77 | Contact |
| Chain AW↔Chain G | AW | LEU4 | G | LEU340 |  | Hydrophobic |
| Chain AW↔Chain G | AW | LEU4 | G | LEU345 |  | Hydrophobic |
| Chain AW↔Chain G | AW | LYS5 | G | LEU340 | 3.34 | Contact |
| Chain AW↔Chain G | AW | LYS5 | G | GLY338 | 3.27 | Contact |
| Chain AW↔Chain G | AW | LYS5 | G | ASN335 | 3.91 | Contact |
| Chain AW↔Chain G | AW | LYS5 | G | CYS336 | 3.94 | Contact |
| Chain AW↔Chain G | AW | LEU6 | G | LEU340 | 3.66 | Contact |
| Chain AW↔Chain G | AW | LEU6 | G | TRP298 |  | Hydrophobic |
| Chain AW↔Chain G | AW | LEU6 | G | ILE296 |  | Hydrophobic |
| Chain AW↔Chain G | AW | CYS7 | G | LEU340 | 2.81 | Hydrogen bond |
| Chain AW↔Chain G | AW | CYS7 | G | CYS339 |  | Hydrophobic |
| Chain AW↔Chain G | AW | CYS7 | G | VAL342 | 3.79 | Contact |
| Chain AW↔Chain G | AW | CYS7 | G | PRO341 | 3.55 | Contact |
| Chain AW↔Chain G | AW | ASN15 | G | PRO334 | 3.45 | Hydrogen bond |
| Chain AW↔Chain G | AW | VAL16 | G | SER439 |  | Hydrophobic |
| Chain AW↔Chain G | AW | VAL16 | G | PRO438 |  | Hydrophobic |

| **Interface** | **Chain1** | **gp36** | **Chain2** | **gp29** | **Disatnce (Å)** | **Bond type** |
| --- | --- | --- | --- | --- | --- | --- |
| Chain AW↔Chain N | AW | VAL29 | N | THR345 | 3.72 | Contact |
| Chain AW↔Chain N | AW | LEU30 | N | GLU346 | 3.26 | Hydrogen bond |
| Chain AW↔Chain N | AW | SER31 | N | GLU346 | 3.99 | Contact |
| Chain AW↔Chain N | AW | GLU32 | N | GLU346 | 3.45 | Hydrogen bond |
| Chain AW↔Chain N | AW | GLU32 | N | GLY347 | 3.56 | Contact |
| Chain AW↔Chain N | AW | GLN33 | N | VAL256 | 3.35 | Contact |
| Chain AW↔Chain N | AW | GLN33 | N | ALA260 | 3.75 | Contact |
| Chain AW↔Chain N | AW | GLN33 | N | SER257 | 3.84 | Contact |
| Chain AW↔Chain N | AW | PHE34 | N | GLN360 |  | Hydrophobic |
| Chain AW↔Chain N | AW | LEU35 | N | ASP255 | 3.18 | Contact |
| Chain AW↔Chain N | AW | GLU36 | N | LEU357 |  | Hydrophobic |
| Chain AW↔Chain N | AW | ASP54 | N | ASP255 | 3.48 | Hydrogen bond |
| Chain AW↔Chain N | AW | ASP56 | N | SER257 | 3.32 | Contact |
| Chain AW↔Chain N | AW | ASP56 | N | ARG261 | 3.85 | Salt bridge (Electrostatic, Hydrogen bond) |
| Chain AW↔Chain N | AW | ASP56 | N | ASP157 | 3.28 | Hydrogen bond |
| Chain AW↔Chain N | AW | ILE57 | N | ARG261 | 3.97 | Contact |
| Chain AW↔Chain N | AW | THR58 | N | ARG261 | 3.69 | Hydrogen bond |
| Chain AW↔Chain N | AW | THR58 | N | ARG155 | 3.89 | Contact |
| Chain AW↔Chain N | AW | TRP59 | N | GLU346 |  | Hydrophobic |
| Chain AW↔Chain N | AW | HIS60 | N | PRO151 | 3.50 | Hydrogen bond |
| Chain AW↔Chain N | AW | HIS60 | N | ARG155 | 3.66 | Contact |
| Chain AW↔Chain N | AW | ASP62 | N | PRO151 |  | Hydrophobic |
| Chain AW↔Chain N | AW | ASP62 | N | ARG195 | 3.01 | Salt bridge (Electrostatic, Hydrogen bond) |
| Chain AW↔Chain N | AW | LYS100 | N | ARG155 | 3.15 | Hydrogen bond |
| Chain AW↔Chain N | AW | ALA101 | N | TRP126 |  | Hydrophobic |
| Chain AW↔Chain N | AW | PRO102 | N | ARG155 |  | Hydrophobic |
| Chain AW↔Chain N | AW | PRO102 | N | ALA121 | 3.57 | Contact |
| Chain AW↔Chain N | AW | SER103 | N | ALA121 |  | Hydrophobic |
| Chain AW↔Chain N | AW | SER103 | N | ASP120 | 4.00 | Contact |
| Chain AW↔Chain N | AW | HIS158 | N | ALA121 | 3.46 | Contact |
| Chain AW↔Chain N | AW | ARG160 | N | ASP120 | 3.40 | Salt bridge (Electrostatic, Hydrogen bond) |
| Chain AW↔Chain N | AW | ARG189 | N | PRO358 | 3.77 | Contact |
| Chain AW↔Chain N | AW | TRP190 | N | GLN360 | 3.86 | Contact |
| Chain AW↔Chain N | AW | TRP190 | N | LEU357 |  | Hydrophobic |
| Chain AW↔Chain N | AW | TRP190 | N | PRO358 | 3.58 | Contact |
| Chain AW↔Chain N | AW | TRP190 | N | GLY359 | 3.71 | Contact |

**Supplementary Tables Table 5f**

**gp36 (fiber) chain w interactions (Intra) please refer to table 5e**

**gp35 (fiber) chain q interactions (Intra) please refer to table 5e**

**Supplementary Tables 5g**

**gp37 (fiber) chain BC/gp28 (DTP)/gp41 inter complex interaction**

| **Interface** | **Chain1** | **gp37** | **Chain2** | **gp28** | **Disatnce (Å)** | **Bond type** |
| --- | --- | --- | --- | --- | --- | --- |
| Chain BC↔Chain G | BC | THR2 | G | PRO295 |  | Hydrophobic |
| Chain BC↔Chain G | BC | THR2 | G | LEU344 |  | Hydrophobic |
| Chain BC↔Chain G | BC | ALA3 | G | VAL342 |  | Hydrophobic |
| Chain BC↔Chain G | BC | PRO4 | G | TRP298 |  | Hydrophobic |
| Chain BC↔Chain G | BC | PRO4 | G | ILE296 | 3.58 | Contact |
| Chain BC↔Chain G | BC | GLY16 | G | VAL342 | 3.33 | Contact |

| **Interface** | **Chain1** | **gp37** | **Chain2** | **gp41** | **Disatnce (Å)** | **Bond type** |
| --- | --- | --- | --- | --- | --- | --- |
| Chain AM↔Chain BC | AM | THR69 | BC | ALA127 | 4.00 | Contact |
| Chain AM↔Chain BC | AM | ASP85 | BC | THR125 | 3.89 | Contact |
| Chain AM↔Chain BC | AM | ASP85 | BC | VAL128 | 3.58 | Contact |
| Chain AM↔Chain BC | AM | VAL87 | BC | THR125 | 3.27 | Contact |
| Chain AM↔Chain BC | AM | VAL87 | BC | GLY123 | 3.74 | Contact |
| Chain AM↔Chain BC | AM | ASN100 | BC | VAL128 |  | Hydrophobic |
| Chain AM↔Chain BC | AM | ASN100 | BC | ARG122 | 3.69 | Contact |
| Chain AM↔Chain BC | AM | GLY114 | BC | ASP181 | 3.69 | Contact |
| Chain AM↔Chain BC | AM | GLY114 | BC | GLY182 | 3.50 | Hydrogen bond |
| Chain AM↔Chain BC | AM | GLY114 | BC | ILE180 | 3.81 | Hydrogen bond |
| Chain AM↔Chain BC | AM | GLY115 | BC | GLY182 | 3.45 | Contact |
| Chain AM↔Chain BC | AM | SER116 | BC | GLY182 | 3.72 | Hydrogen bond |
| Chain AM↔Chain BC | AM | VAL117 | BC | GLY182 |  | Hydrophobic |
| Chain AM↔Chain BC | AM | ASP223 | BC | LEU126 | 3.75 | Contact |
| Chain AM↔Chain BC | AM | ASP223 | BC | THR125 |  | Hydrophobic |

**Supplementary Tables 5g**

**gp36 (fiber) chain w interactions (Intra) please refer to 5e**

**gp35 (fiber) chain q interactions (Intra) please refer to 5e**

**Supplementary Tables 5h**

**gp40 (fiber) chain P,Q,R/gp28 (DTP)/gp35 (fiber)/gp41 inter complex interaction**

| **Interface** | **Chain1** | **gp28** | **Chain2** | **gp40** | **Disatnce (Å)** | **Bond type** |
| --- | --- | --- | --- | --- | --- | --- |
| Chain K↔Chain P | K | LEU44 | P | ASN5 | 3.57 | Contact |
| Chain K↔Chain P | K | ARG51 | P | ASP19 | 3.45 | Contact |
| Chain K↔Chain P | K | ARG51 | P | ASP20 | 3.98 | Salt bridge (Electrostatic, Hydrogen bond) |
| Chain K↔Chain P | K | ARG51 | P | GLU21 | 3.36 | Contact |
| Chain K↔Chain P | K | LEU52 | P | ASP19 | 3.92 | Contact |
| Chain K↔Chain P | K | LEU52 | P | MET7 | 3.96 | Contact |
| Chain K↔Chain P | K | LEU52 | P | ASP9 | 3.74 | Contact |
| Chain K↔Chain P | K | LEU52 | P | LYS17 | 3.15 | Contact |
| Chain K↔Chain P | K | LEU52 | P | MET8 |  | Hydrophobic |
| Chain K↔Chain P | K | LEU53 | P | MET7 | 3.97 | Contact |
| Chain K↔Chain P | K | LEU53 | P | ASN5 | 3.25 | Contact |
| Chain K↔Chain P | K | LEU53 | P | ASP19 |  | Hydrophobic |
| Chain K↔Chain P | K | LEU53 | P | ALA4 |  | Hydrophobic |
| Chain K↔Chain P | K | SER54 | P | MET7 | 3.52 | Contact |
| Chain K↔Chain P | K | SER54 | P | ASN5 | 2.90 | Hydrogen bond |
| Chain K↔Chain P | K | SER54 | P | ALA4 | 3.28 | Contact |
| Chain K↔Chain P | K | VAL55 | P | ASN5 | 3.83 | Hydrogen bond |
| Chain K↔Chain P | K | VAL56 | P | ILE3 | 3.98 | Contact |
| Chain K↔Chain P | K | GLN60 | P | ASN5 | 3.61 | Contact |
| Chain K↔Chain P | K | LEU68 | P | ILE3 |  | Hydrophobic |
| Chain K↔Chain P | K | TYR70 | P | ILE3 |  | Hydrophobic |
| Chain K↔Chain P | K | LEU83 | P | MET8 |  | Hydrophobic |

| **Interface** | **Chain1** | **gp41** | **Chain2** | **gp40** | **Disatnce (Å)** | **Bond type** |
| --- | --- | --- | --- | --- | --- | --- |
| Chain AJ↔Chain P | AJ | ARG7 | P | TYR115 |  | Hydrophobic |
| Chain AJ↔Chain P | AJ | ARG7 | P | ARG113 | 3.72 | Hydrogen bond |
| Chain AJ↔Chain P | AJ | PRO12 | P | SER136 | 3.29 | Hydrogen bond |
| Chain AJ↔Chain P | AJ | ILE13 | P | ILE135 |  | Hydrophobic |
| Chain AJ↔Chain P | AJ | ILE13 | P | SER136 | 3.34 | Contact |
| Chain AJ↔Chain P | AJ | ILE13 | P | TYR115 |  | Hydrophobic |
| Chain AJ↔Chain P | AJ | THR14 | P | SER136 | 3.71 | Contact |
| Chain AJ↔Chain P | AJ | THR14 | P | ILE135 | 3.63 | Hydrogen bond |
| Chain AJ↔Chain P | AJ | SER15 | P | ILE135 | 3.21 | Hydrogen bond |
| Chain AJ↔Chain P | AJ | SER15 | P | TYR134 | 3.78 | Contact |
| Chain AJ↔Chain P | AJ | SER15 | P | TYR133 | 3.77 | Hydrogen bond |
| Chain AJ↔Chain P | AJ | ILE16 | P | TYR134 |  | Hydrophobic |
| Chain AJ↔Chain P | AJ | ILE16 | P | TYR133 | 3.70 | Contact |
| Chain AJ↔Chain P | AJ | MET17 | P | TYR133 | 3.97 | Contact |
| Chain AJ↔Chain P | AJ | MET17 | P | ILE135 |  | Hydrophobic |
| Chain AJ↔Chain P | AJ | MET17 | P | TYR121 |  | Hydrophobic |
| Chain AJ↔Chain P | AJ | ARG18 | P | THR131 | 3.49 | Contact |
| Chain AJ↔Chain P | AJ | ARG18 | P | ASP132 | 3.88 | Contact |
| Chain AJ↔Chain P | AJ | ARG18 | P | PRO129 | 3.37 | Contact |
| Chain AJ↔Chain P | AJ | ARG18 | P | SER111 | 3.91 | Contact |
| Chain AJ↔Chain P | AJ | ARG18 | P | ASN130 | 3.57 | Contact |
| Chain AJ↔Chain P | AJ | GLY19 | P | TYR121 | 2.86 | Hydrogen bond |
| Chain AJ↔Chain P | AJ | GLY19 | P | PRO127 | 3.82 | Contact |
| Chain AJ↔Chain P | AJ | GLY19 | P | THR131 | 3.78 | Hydrogen bond |
| Chain AJ↔Chain P | AJ | GLY19 | P | ASP128 | 3.87 | Contact |
| Chain AJ↔Chain P | AJ | GLY19 | P | PRO129 |  | Hydrophobic |

| **Interface** | **Chain1** | **gp28** | **Chain2** | **gp40** | **Disatnce (Å)** | **Bond type** |
| --- | --- | --- | --- | --- | --- | --- |
| Chain K↔Chain Q | K | GLY11 | Q | SER11 | 3.85 | Hydrogen bond |
| Chain K↔Chain Q | K | LEU69 | Q | MET8 |  | Hydrophobic |
| Chain K↔Chain Q | K | TYR79 | Q | THR2 |  | Hydrophobic |
| Chain K↔Chain Q | K | PRO81 | Q | ASP19 | 3.66 | Hydrogen bond |
| Chain K↔Chain Q | K | GLY82 | Q | ASP19 | 3.27 | Hydrogen bond |
| Chain K↔Chain Q | K | GLY82 | Q | VAL6 | 3.92 | Contact |
| Chain K↔Chain Q | K | GLY82 | Q | MET7 | 3.02 | Hydrogen bond |
| Chain K↔Chain Q | K | LEU83 | Q | ALA4 |  | Hydrophobic |
| Chain K↔Chain Q | K | LEU83 | Q | ASN5 | 3.36 | Contact |
| Chain K↔Chain Q | K | LEU83 | Q | GLU21 | 3.73 | Contact |
| Chain K↔Chain Q | K | GLY84 | Q | ALA4 |  | Hydrophobic |
| Chain K↔Chain Q | K | GLY84 | Q | ASN5 | 3.48 | Hydrogen bond |
| Chain K↔Chain Q | K | GLY84 | Q | MET7 |  | Hydrophobic |
| Chain K↔Chain Q | K | VAL85 | Q | ALA4 |  | Hydrophobic |
| Chain K↔Chain Q | K | VAL85 | Q | THR2 | 3.38 | Contact |
| Chain K↔Chain Q | K | VAL86 | Q | ASN5 | 3.30 | Contact |

| **Interface** | **Chain1** | **gp28** | **Chain2** | **gp40** | **Disatnce (Å)** | **Bond type** |
| --- | --- | --- | --- | --- | --- | --- |
| Chain K↔Chain R | K | LEU53 | R | MET8 |  | Hydrophobic |
| Chain K↔Chain R | K | GLN60 | R | ASN5 | 3.84 | Hydrogen bond |
| Chain K↔Chain R | K | ILE63 | R | ALA4 |  | Hydrophobic |
| Chain K↔Chain R | K | ILE63 | R | THR2 |  | Hydrophobic |
| Chain K↔Chain R | K | ARG67 | R | GLU21 | 3.65 | Contact |
| Chain K↔Chain R | K | LEU68 | R | MET7 |  | Hydrophobic |
| Chain K↔Chain R | K | LEU68 | R | ASP19 | 3.88 | Contact |
| Chain K↔Chain R | K | LEU68 | R | MET8 | 3.72 | Contact |
| Chain K↔Chain R | K | LEU68 | R | ASP9 |  | Hydrophobic |
| Chain K↔Chain R | K | LEU69 | R | ASP19 | 3.57 | Hydrogen bond |
| Chain K↔Chain R | K | LEU69 | R | GLU21 | 3.23 | Contact |
| Chain K↔Chain R | K | LEU69 | R | VAL6 |  | Hydrophobic |
| Chain K↔Chain R | K | LEU69 | R | ASN5 | 3.19 | Contact |
| Chain K↔Chain R | K | LEU69 | R | ALA4 | 3.80 | Contact |
| Chain K↔Chain R | K | TYR70 | R | MET7 |  | Hydrophobic |
| Chain K↔Chain R | K | TYR70 | R | ASN5 | 3.74 | Hydrogen bond |
| Chain K↔Chain R | K | TYR70 | R | ALA4 | 3.58 | Contact |
| Chain K↔Chain R | K | PRO72 | R | ILE3 | 3.84 | Contact |
| Chain K↔Chain R | K | PRO73 | R | ASN5 | 3.92 | Contact |
| Chain K↔Chain R | K | SER117 | R | THR2 | 3.82 | Hydrogen bond |
| Chain K↔Chain R | K | ASP118 | R | THR2 |  | Hydrophobic |
| Chain K↔Chain R | K | GLY119 | R | THR2 | 3.82 | Contact |
| Chain K↔Chain R | K | GLY425 | R | ASP36 | 3.80 | Hydrogen bond |

| **Interface** | **Chain1** | **gp41** | **Chain2** | **gp40** | **Disatnce (Å)** | **Bond type** |
| --- | --- | --- | --- | --- | --- | --- |
| Chain AJ↔Chain R | AJ | ARG18 | R | TYR115 |  | Hydrophobic |
| Chain AJ↔Chain R | AJ | PRO22 | R | ILE135 | 3.95 | Hydrogen bond |
| Chain AJ↔Chain R | AJ | PRO22 | R | SER136 | 3.52 | Contact |
| Chain AJ↔Chain R | AJ | ILE23 | R | TYR134 |  | Hydrophobic |
| Chain AJ↔Chain R | AJ | ILE23 | R | ILE135 | 3.39 | Contact |
| Chain AJ↔Chain R | AJ | ILE23 | R | SER136 |  | Hydrophobic |
| Chain AJ↔Chain R | AJ | LYS24 | R | ILE135 | 3.03 | Hydrogen bond |
| Chain AJ↔Chain R | AJ | LYS24 | R | SER136 | 3.19 | Contact |
| Chain AJ↔Chain R | AJ | GLU25 | R | ILE135 | 3.95 | Hydrogen bond |
| Chain AJ↔Chain R | AJ | GLU25 | R | TYR134 | 3.75 | Contact |
| Chain AJ↔Chain R | AJ | GLU25 | R | TYR133 | 3.27 | Hydrogen bond |
| Chain AJ↔Chain R | AJ | ILE26 | R | TYR133 | 3.90 | Contact |
| Chain AJ↔Chain R | AJ | ILE26 | R | ASP132 |  | Hydrophobic |
| Chain AJ↔Chain R | AJ | ILE26 | R | TYR134 |  | Hydrophobic |
| Chain AJ↔Chain R | AJ | ARG27 | R | TYR133 | 3.34 | Hydrogen bond |
| Chain AJ↔Chain R | AJ | ARG27 | R | TYR121 | 3.86 | Contact |
| Chain AJ↔Chain R | AJ | ARG27 | R | THR131 | 3.68 | Hydrogen bond |
| Chain AJ↔Chain R | AJ | ARG27 | R | ASP132 | 3.93 | Contact |
| Chain AJ↔Chain R | AJ | ARG28 | R | THR131 | 3.61 | Contact |
| Chain AJ↔Chain R | AJ | ARG28 | R | ASP132 | 3.99 | Contact |
| Chain AJ↔Chain R | AJ | ARG28 | R | SER111 | 3.91 | Contact |
| Chain AJ↔Chain R | AJ | ARG28 | R | GLU110 | 3.64 | Contact |
| Chain AJ↔Chain R | AJ | ARG28 | R | ASN130 | 3.53 | Hydrogen bond |
| Chain AJ↔Chain R | AJ | GLY29 | R | THR131 | 3.53 | Hydrogen bond |
| Chain AJ↔Chain R | AJ | GLY29 | R | ASP128 | 3.94 | Hydrogen bond |
| Chain AJ↔Chain R | AJ | GLY29 | R | TYR121 | 3.94 | Contact |
| Chain AJ↔Chain R | AJ | GLY29 | R | PRO127 |  | Hydrophobic |
| Chain AJ↔Chain R | AJ | THR30 | R | TYR121 | 3.97 | Contact |
| Chain AJ↔Chain R | AJ | GLN312 | R | ALA122 | 3.86 | Contact |
| Chain AJ↔Chain R | AJ | ARG314 | R | ALA119 | 3.82 | Hydrogen bond |
| Chain AJ↔Chain R | AJ | ASN327 | R | ALA122 | 3.37 | Contact |
| Chain AJ↔Chain R | AJ | ASN327 | R | LEU123 | 3.74 | Hydrogen bond |
| Chain AJ↔Chain R | AJ | GLY328 | R | ALA119 |  | Hydrophobic |
| Chain AJ↔Chain R | AJ | GLY328 | R | ALA122 | 3.43 | Contact |
| Chain AJ↔Chain R | AJ | GLY328 | R | LEU123 | 3.96 | Contact |

| **Interface** | **Chain1** | **gp35** | **Chain2** | **gp40** | **Disatnce (Å)** | **Bond type** |
| --- | --- | --- | --- | --- | --- | --- |
| Chain AT↔Chain R | AT | ILE35 | R | ASN107 | 3.57 | Contact |
| Chain AT↔Chain R | AT | ILE35 | R | VAL109 | 3.81 | Contact |
| Chain AT↔Chain R | AT | ARG37 | R | PRO129 | 3.93 | Hydrogen bond |
| Chain AT↔Chain R | AT | ARG37 | R | ASP103 | 3.59 | Contact |
| Chain AT↔Chain R | AT | GLY39 | R | PRO129 | 3.45 | Contact |
| Chain AT↔Chain R | AT | LEU56 | R | THR126 |  | Hydrophobic |
| Chain AT↔Chain R | AT | LEU56 | R | PRO129 |  | Hydrophobic |
| Chain AT↔Chain R | AT | LEU57 | R | PRO129 |  | Hydrophobic |
| Chain AT↔Chain R | AT | ASN59 | R | PRO129 | 3.90 | Contact |
| Chain AT↔Chain R | AT | ASN59 | R | ASN130 | 3.95 | Contact |
| Chain AT↔Chain R | AT | ASN59 | R | ASP128 | 3.57 | Contact |
| Chain AT↔Chain R | AT | ARG160 | R | ALA85 | 3.73 | Contact |

**Supplementary Tables 5h**

**gp40 (fiber) chain P interactions (Intra)**

| **Interface** | **Chain1** | **gp40** | **Chain2** | **gp40** | **Disatnce (Å)** | **Bond type** |
| --- | --- | --- | --- | --- | --- | --- |
| Chain P↔Chain Q | P | VAL6 | Q | VAL6 |  | Hydrophobic |
| Chain P↔Chain Q | P | VAL6 | Q | ASN5 | 3.84 | Contact |
| Chain P↔Chain Q | P | MET7 | Q | ILE3 |  | Hydrophobic |
| Chain P↔Chain Q | P | MET7 | Q | ALA4 | 3.33 | Contact |
| Chain P↔Chain Q | P | MET7 | Q | ASN5 | 3.15 | Contact |
| Chain P↔Chain Q | P | MET8 | Q | ALA4 | 2.88 | Hydrogen bond |
| Chain P↔Chain Q | P | MET8 | Q | ILE3 | 3.46 | Contact |
| Chain P↔Chain Q | P | MET8 | Q | GLU21 |  | Hydrophobic |
| Chain P↔Chain Q | P | ASP9 | Q | THR2 | 2.99 | Hydrogen bond |
| Chain P↔Chain Q | P | ASP9 | Q | ILE3 | 3.96 | Hydrogen bond |
| Chain P↔Chain Q | P | THR10 | Q | GLU21 | 3.97 | Contact |
| Chain P↔Chain Q | P | THR10 | Q | THR2 | 3.30 | Contact |
| Chain P↔Chain Q | P | PRO14 | Q | GLU25 | 3.70 | Contact |
| Chain P↔Chain Q | P | PRO14 | Q | GLU28 | 3.81 | Contact |
| Chain P↔Chain Q | P | GLY15 | Q | GLU28 | 3.04 | Hydrogen bond |
| Chain P↔Chain Q | P | GLY15 | Q | GLU25 | 3.43 | Hydrogen bond |
| Chain P↔Chain Q | P | GLY15 | Q | LEU29 |  | Hydrophobic |
| Chain P↔Chain Q | P | LYS17 | Q | GLU25 |  | Hydrophobic |
| Chain P↔Chain Q | P | LEU18 | Q | GLU25 |  | Hydrophobic |
| Chain P↔Chain Q | P | LEU18 | Q | MET22 |  | Hydrophobic |
| Chain P↔Chain Q | P | ILE23 | Q | LEU29 |  | Hydrophobic |
| Chain P↔Chain Q | P | ILE26 | Q | ALA30 |  | Hydrophobic |
| Chain P↔Chain Q | P | ALA30 | Q | ALA30 | 3.70 | Contact |
| Chain P↔Chain Q | P | GLY32 | Q | ILE33 | 3.51 | Contact |
| Chain P↔Chain Q | P | GLY32 | Q | PRO34 | 3.41 | Contact |
| Chain P↔Chain Q | P | ILE33 | Q | THR38 |  | Hydrophobic |
| Chain P↔Chain Q | P | PRO34 | Q | LYS43 | 3.35 | Contact |
| Chain P↔Chain Q | P | PRO34 | Q | ILE39 |  | Hydrophobic |
| Chain P↔Chain Q | P | ASP36 | Q | ALA42 | 3.32 | Contact |
| Chain P↔Chain Q | P | ASP36 | Q | LYS43 | 3.99 | Salt bridge (Electrostatic, Hydrogen bond) |
| Chain P↔Chain Q | P | GLY37 | Q | LYS43 | 3.42 | Contact |
| Chain P↔Chain Q | P | GLY37 | Q | LEU44 | 3.80 | Hydrogen bond |
| Chain P↔Chain Q | P | GLY37 | Q | HIS45 | 3.67 | Contact |
| Chain P↔Chain Q | P | GLY37 | Q | ALA42 | 3.38 | Hydrogen bond |
| Chain P↔Chain Q | P | ILE39 | Q | HIS45 | 3.69 | Hydrogen bond |
| Chain P↔Chain Q | P | ILE39 | Q | ALA48 | 3.25 | Contact |
| Chain P↔Chain Q | P | ILE39 | Q | LYS43 | 3.36 | Contact |
| Chain P↔Chain Q | P | GLU41 | Q | LYS53 | 3.44 | Salt bridge (Electrostatic, Hydrogen bond) |
| Chain P↔Chain Q | P | GLU41 | Q | SER50 | 3.98 | Hydrogen bond |
| Chain P↔Chain Q | P | GLU41 | Q | ALA48 | 3.97 | Hydrogen bond |
| Chain P↔Chain Q | P | GLU41 | Q | VAL49 | 3.99 | Hydrogen bond |
| Chain P↔Chain Q | P | GLU41 | Q | GLN47 | 3.90 | Contact |
| Chain P↔Chain Q | P | LEU44 | Q | LYS53 | 3.82 | Contact |
| Chain P↔Chain Q | P | LEU44 | Q | ALA48 | 3.29 | Contact |
| Chain P↔Chain Q | P | HIS45 | Q | LYS53 | 3.70 | Contact |
| Chain P↔Chain Q | P | ASN46 | Q | LYS53 | 3.44 | Hydrogen bond |
| Chain P↔Chain Q | P | ASN46 | Q | ASP52 | 3.86 | Contact |
| Chain P↔Chain Q | P | GLN47 | Q | LYS53 | 3.77 | Contact |
| Chain P↔Chain Q | P | GLN47 | Q | ASP52 | 3.35 | Hydrogen bond |
| Chain P↔Chain Q | P | GLN47 | Q | LYS55 |  | Hydrophobic |
| Chain P↔Chain Q | P | GLN47 | Q | LEU54 | 3.77 | Contact |
| Chain P↔Chain Q | P | ALA48 | Q | LYS53 | 3.11 | Hydrogen bond |
| Chain P↔Chain Q | P | VAL49 | Q | LYS53 | 3.56 | Hydrogen bond |
| Chain P↔Chain Q | P | VAL49 | Q | LYS55 | 3.93 | Hydrogen bond |
| Chain P↔Chain Q | P | VAL49 | Q | LEU54 | 3.92 | Contact |
| Chain P↔Chain Q | P | SER50 | Q | LYS55 | 3.99 | Contact |
| Chain P↔Chain Q | P | ARG51 | Q | ALA58 | 3.82 | Hydrogen bond |
| Chain P↔Chain Q | P | ARG51 | Q | ILE63 | 3.72 | Contact |
| Chain P↔Chain Q | P | ARG51 | Q | ASP60 |  | Hydrophobic |
| Chain P↔Chain Q | P | ARG51 | Q | GLY57 | 3.90 | Hydrogen bond |
| Chain P↔Chain Q | P | LEU54 | Q | ILE63 |  | Hydrophobic |
| Chain P↔Chain Q | P | LYS55 | Q | ILE63 | 3.94 | Contact |
| Chain P↔Chain Q | P | LYS55 | Q | GLU41 | 3.01 | Salt bridge (Electrostatic, Hydrogen bond) |
| Chain P↔Chain Q | P | PRO56 | Q | THR62 | 3.24 | Contact |
| Chain P↔Chain Q | P | PRO56 | Q | ILE63 |  | Hydrophobic |
| Chain P↔Chain Q | P | GLY57 | Q | THR62 | 3.52 | Hydrogen bond |
| Chain P↔Chain Q | P | GLY57 | Q | ILE63 | 3.74 | Contact |
| Chain P↔Chain Q | P | GLY57 | Q | ALA65 |  | Hydrophobic |
| Chain P↔Chain Q | P | ALA58 | Q | ILE63 | 3.21 | Hydrogen bond |
| Chain P↔Chain Q | P | VAL59 | Q | ALA65 | 3.94 | Contact |
| Chain P↔Chain Q | P | VAL59 | Q | ILE63 | 3.91 | Hydrogen bond |
| Chain P↔Chain Q | P | VAL59 | Q | ILE64 | 3.97 | Contact |
| Chain P↔Chain Q | P | ASP60 | Q | GLY68 |  | Hydrophobic |
| Chain P↔Chain Q | P | SER61 | Q | ASN73 | 3.79 | Contact |
| Chain P↔Chain Q | P | SER61 | Q | GLY68 | 3.87 | Contact |
| Chain P↔Chain Q | P | SER61 | Q | LYS70 | 3.85 | Hydrogen bond |
| Chain P↔Chain Q | P | ILE64 | Q | ASN73 | 3.63 | Contact |
| Chain P↔Chain Q | P | ILE64 | Q | ILE69 |  | Hydrophobic |
| Chain P↔Chain Q | P | ALA65 | Q | ASN73 | 3.93 | Contact |
| Chain P↔Chain Q | P | GLU66 | Q | ASN73 | 3.95 | Contact |
| Chain P↔Chain Q | P | GLU66 | Q | TYR74 | 3.80 | Hydrogen bond |
| Chain P↔Chain Q | P | GLU66 | Q | VAL72 | 3.89 | Contact |
| Chain P↔Chain Q | P | GLY67 | Q | GLU75 |  | Hydrophobic |
| Chain P↔Chain Q | P | GLY68 | Q | GLU75 | 3.46 | Hydrogen bond |
| Chain P↔Chain Q | P | GLY68 | Q | ASN73 | 3.35 | Hydrogen bond |
| Chain P↔Chain Q | P | ILE69 | Q | GLU75 |  | Hydrophobic |
| Chain P↔Chain Q | P | LYS70 | Q | GLU75 | 3.96 | Contact |
| Chain P↔Chain Q | P | ALA71 | Q | SER78 | 3.90 | Contact |
| Chain P↔Chain Q | P | TYR74 | Q | TYR74 | 3.09 | Contact |
| Chain P↔Chain Q | P | TYR74 | Q | ALA83 |  | Hydrophobic |
| Chain P↔Chain Q | P | GLY76 | Q | ALA82 | 3.30 | Contact |
| Chain P↔Chain Q | P | LYS77 | Q | ALA82 | 3.00 | Hydrogen bond |
| Chain P↔Chain Q | P | LYS77 | Q | ALA83 | 3.80 | Hydrogen bond |
| Chain P↔Chain Q | P | LYS77 | Q | ALA85 |  | Hydrophobic |
| Chain P↔Chain Q | P | LYS77 | Q | LEU84 | 3.81 | Contact |
| Chain P↔Chain Q | P | LYS77 | Q | ASP86 | 3.65 | Contact |
| Chain P↔Chain Q | P | SER78 | Q | ALA83 | 2.97 | Hydrogen bond |
| Chain P↔Chain Q | P | VAL79 | Q | ALA83 | 2.98 | Hydrogen bond |
| Chain P↔Chain Q | P | VAL79 | Q | VAL79 |  | Hydrophobic |
| Chain P↔Chain Q | P | VAL79 | Q | ALA85 | 3.91 | Contact |
| Chain P↔Chain Q | P | VAL79 | Q | LEU84 | 3.53 | Contact |
| Chain P↔Chain Q | P | VAL79 | Q | SER88 | 3.84 | Contact |
| Chain P↔Chain Q | P | ALA81 | Q | SER88 | 3.63 | Contact |
| Chain P↔Chain Q | P | ALA81 | Q | GLN93 | 3.17 | Hydrogen bond |
| Chain P↔Chain Q | P | LEU84 | Q | GLN93 |  | Hydrophobic |
| Chain P↔Chain Q | P | LEU84 | Q | SER88 | 3.90 | Contact |
| Chain P↔Chain Q | P | LEU84 | Q | VAL89 |  | Hydrophobic |
| Chain P↔Chain Q | P | ALA85 | Q | GLN93 | 3.70 | Contact |
| Chain P↔Chain Q | P | ASP86 | Q | LEU92 | 3.81 | Contact |
| Chain P↔Chain Q | P | HIS87 | Q | LEU92 | 2.96 | Hydrogen bond |
| Chain P↔Chain Q | P | HIS87 | Q | GLN93 | 3.90 | Contact |
| Chain P↔Chain Q | P | HIS87 | Q | GLY95 | 3.74 | Contact |
| Chain P↔Chain Q | P | HIS87 | Q | ALA94 |  | Hydrophobic |
| Chain P↔Chain Q | P | SER88 | Q | GLN93 | 3.95 | Contact |
| Chain P↔Chain Q | P | VAL89 | Q | GLN93 | 3.76 | Contact |
| Chain P↔Chain Q | P | VAL89 | Q | GLY95 | 3.98 | Contact |
| Chain P↔Chain Q | P | VAL89 | Q | ALA94 | 3.94 | Contact |
| Chain P↔Chain Q | P | VAL89 | Q | VAL98 | 3.78 | Contact |
| Chain P↔Chain Q | P | VAL89 | Q | VAL89 |  | Hydrophobic |
| Chain P↔Chain Q | P | GLY90 | Q | VAL98 |  | Hydrophobic |
| Chain P↔Chain Q | P | VAL91 | Q | GLY97 |  | Hydrophobic |
| Chain P↔Chain Q | P | VAL98 | Q | VAL98 |  | Hydrophobic |
| Chain P↔Chain Q | P | CYS99 | Q | ARG113 | 3.67 | Contact |
| Chain P↔Chain Q | P | CYS99 | Q | CYS99 | 3.59 | Contact |
| Chain P↔Chain Q | P | THR100 | Q | GLY97 | 3.54 | Contact |
| Chain P↔Chain Q | P | ALA101 | Q | GLY97 | 3.95 | Contact |
| Chain P↔Chain Q | P | PRO108 | Q | GLY97 |  | Hydrophobic |
| Chain P↔Chain Q | P | VAL109 | Q | GLY97 | 3.69 | Hydrogen bond |
| Chain P↔Chain Q | P | GLU110 | Q | GLY95 | 3.77 | Hydrogen bond |
| Chain P↔Chain Q | P | GLU110 | Q | THR96 | 3.55 | Contact |
| Chain P↔Chain Q | P | SER111 | Q | THR100 | 3.61 | Hydrogen bond |
| Chain P↔Chain Q | P | SER111 | Q | CYS99 | 3.38 | Contact |
| Chain P↔Chain Q | P | LYS112 | Q | THR100 | 3.15 | Contact |
| Chain P↔Chain Q | P | LYS112 | Q | TYR102 |  | Hydrophobic |
| Chain P↔Chain Q | P | ARG113 | Q | ASP132 | 3.95 | Salt bridge (Electrostatic, Hydrogen bond) |
| Chain P↔Chain Q | P | ARG113 | Q | THR100 | 2.91 | Hydrogen bond |
| Chain P↔Chain Q | P | ARG113 | Q | ALA101 | 3.77 | Contact |
| Chain P↔Chain Q | P | ARG113 | Q | TYR102 | 3.13 | Hydrogen bond |
| Chain P↔Chain Q | P | ARG113 | Q | SER111 | 3.65 | Hydrogen bond |
| Chain P↔Chain Q | P | VAL114 | Q | TYR102 | 3.75 | Contact |
| Chain P↔Chain Q | P | VAL114 | Q | ASP103 |  | Hydrophobic |
| Chain P↔Chain Q | P | TYR115 | Q | TYR102 | 3.92 | Hydrogen bond |
| Chain P↔Chain Q | P | TYR115 | Q | ALA104 | 3.79 | Hydrogen bond |
| Chain P↔Chain Q | P | GLN120 | Q | ALA104 |  | Hydrophobic |
| Chain P↔Chain R | P | THR2 | R | THR10 | 3.40 | Hydrogen bond |
| Chain P↔Chain R | P | THR2 | R | MET8 | 3.93 | Hydrogen bond |
| Chain P↔Chain R | P | THR2 | R | ASP9 | 3.72 | Contact |
| Chain P↔Chain R | P | ILE3 | R | MET7 |  | Hydrophobic |
| Chain P↔Chain R | P | ILE3 | R | ASP9 | 3.92 | Hydrogen bond |
| Chain P↔Chain R | P | ALA4 | R | MET8 | 3.60 | Hydrogen bond |
| Chain P↔Chain R | P | ALA4 | R | MET7 |  | Hydrophobic |
| Chain P↔Chain R | P | ASN5 | R | ASN5 | 3.24 | Hydrogen bond |
| Chain P↔Chain R | P | ASN5 | R | VAL6 | 3.84 | Contact |
| Chain P↔Chain R | P | ASN5 | R | MET7 | 3.72 | Contact |
| Chain P↔Chain R | P | VAL6 | R | VAL6 | 3.26 | Hydrogen bond |
| Chain P↔Chain R | P | GLU21 | R | LYS17 | 3.13 | Contact |
| Chain P↔Chain R | P | GLU21 | R | MET8 | 3.76 | Hydrogen bond |
| Chain P↔Chain R | P | MET22 | R | MET8 | 3.89 | Contact |
| Chain P↔Chain R | P | GLU25 | R | GLY15 | 3.74 | Contact |
| Chain P↔Chain R | P | GLU25 | R | PRO14 | 3.99 | Contact |
| Chain P↔Chain R | P | ILE26 | R | ILE26 |  | Hydrophobic |
| Chain P↔Chain R | P | GLU28 | R | PRO14 |  | Hydrophobic |
| Chain P↔Chain R | P | GLU28 | R | GLY15 | 3.50 | Contact |
| Chain P↔Chain R | P | LEU29 | R | LEU18 |  | Hydrophobic |
| Chain P↔Chain R | P | LEU29 | R | ILE23 |  | Hydrophobic |
| Chain P↔Chain R | P | LEU29 | R | GLU27 | 3.81 | Contact |
| Chain P↔Chain R | P | LEU29 | R | GLY15 |  | Hydrophobic |
| Chain P↔Chain R | P | ALA30 | R | ILE26 |  | Hydrophobic |
| Chain P↔Chain R | P | ALA30 | R | ALA30 | 3.50 | Contact |
| Chain P↔Chain R | P | ALA30 | R | GLU27 | 3.91 | Hydrogen bond |
| Chain P↔Chain R | P | PRO31 | R | GLY32 | 3.61 | Contact |
| Chain P↔Chain R | P | PRO34 | R | PRO34 |  | Hydrophobic |
| Chain P↔Chain R | P | GLU41 | R | LYS55 | 3.83 | Contact |
| Chain P↔Chain R | P | ALA42 | R | GLY37 | 3.79 | Contact |
| Chain P↔Chain R | P | ALA42 | R | ASP36 | 3.72 | Contact |
| Chain P↔Chain R | P | LYS43 | R | ILE39 | 3.31 | Hydrogen bond |
| Chain P↔Chain R | P | LYS43 | R | GLY37 | 3.85 | Contact |
| Chain P↔Chain R | P | LYS43 | R | THR38 | 3.52 | Hydrogen bond |
| Chain P↔Chain R | P | LYS43 | R | PRO35 | 3.86 | Contact |
| Chain P↔Chain R | P | LYS43 | R | PRO34 | 3.29 | Contact |
| Chain P↔Chain R | P | LYS43 | R | ASP36 | 3.35 | Contact |
| Chain P↔Chain R | P | LEU44 | R | ILE39 | 3.89 | Contact |
| Chain P↔Chain R | P | LEU44 | R | GLY37 | 3.93 | Contact |
| Chain P↔Chain R | P | HIS45 | R | ILE39 | 3.98 | Contact |
| Chain P↔Chain R | P | HIS45 | R | GLY37 | 3.60 | Contact |
| Chain P↔Chain R | P | ALA48 | R | THR40 |  | Hydrophobic |
| Chain P↔Chain R | P | ALA48 | R | ILE39 | 3.75 | Contact |
| Chain P↔Chain R | P | ALA48 | R | GLU41 | 3.62 | Contact |
| Chain P↔Chain R | P | VAL49 | R | LEU44 |  | Hydrophobic |
| Chain P↔Chain R | P | VAL49 | R | VAL49 |  | Hydrophobic |
| Chain P↔Chain R | P | SER50 | R | GLU41 | 3.96 | Hydrogen bond |
| Chain P↔Chain R | P | ASP52 | R | ASN46 | 3.74 | Contact |
| Chain P↔Chain R | P | ASP52 | R | GLN47 | 3.56 | Hydrogen bond |
| Chain P↔Chain R | P | LYS53 | R | HIS45 | 3.89 | Contact |
| Chain P↔Chain R | P | LYS53 | R | GLN47 | 3.68 | Hydrogen bond |
| Chain P↔Chain R | P | LYS53 | R | ALA48 | 3.98 | Contact |
| Chain P↔Chain R | P | LYS53 | R | VAL49 | 3.20 | Hydrogen bond |
| Chain P↔Chain R | P | LYS53 | R | ASN46 | 3.24 | Contact |
| Chain P↔Chain R | P | LYS53 | R | LEU44 | 3.74 | Contact |
| Chain P↔Chain R | P | LYS53 | R | GLU41 | 3.34 | Contact |
| Chain P↔Chain R | P | LEU54 | R | VAL49 |  | Hydrophobic |
| Chain P↔Chain R | P | LEU54 | R | GLN47 | 3.77 | Contact |
| Chain P↔Chain R | P | LYS55 | R | GLN47 | 3.27 | Contact |
| Chain P↔Chain R | P | LYS55 | R | VAL49 | 3.24 | Hydrogen bond |
| Chain P↔Chain R | P | LYS55 | R | SER50 |  | Hydrophobic |
| Chain P↔Chain R | P | PRO56 | R | GLN47 |  | Hydrophobic |
| Chain P↔Chain R | P | ALA58 | R | SER50 |  | Hydrophobic |
| Chain P↔Chain R | P | ALA58 | R | ARG51 | 3.47 | Hydrogen bond |
| Chain P↔Chain R | P | VAL59 | R | ARG51 | 3.45 | Hydrogen bond |
| Chain P↔Chain R | P | ASP60 | R | ARG51 | 3.62 | Salt bridge (Electrostatic, Hydrogen bond) |
| Chain P↔Chain R | P | THR62 | R | PRO56 | 3.28 | Contact |
| Chain P↔Chain R | P | THR62 | R | GLY57 | 3.20 | Hydrogen bond |
| Chain P↔Chain R | P | ILE63 | R | PRO56 |  | Hydrophobic |
| Chain P↔Chain R | P | ILE63 | R | VAL59 | 3.53 | Hydrogen bond |
| Chain P↔Chain R | P | ILE63 | R | LYS55 | 3.66 | Hydrogen bond |
| Chain P↔Chain R | P | ILE63 | R | ALA58 | 2.97 | Hydrogen bond |
| Chain P↔Chain R | P | ILE63 | R | GLY57 | 3.67 | Contact |
| Chain P↔Chain R | P | ILE63 | R | LEU54 |  | Hydrophobic |
| Chain P↔Chain R | P | ILE63 | R | ARG51 | 3.38 | Contact |
| Chain P↔Chain R | P | ILE64 | R | VAL59 | 3.58 | Contact |
| Chain P↔Chain R | P | ALA65 | R | VAL59 | 2.92 | Hydrogen bond |
| Chain P↔Chain R | P | ALA65 | R | GLY57 |  | Hydrophobic |
| Chain P↔Chain R | P | ILE69 | R | ILE64 |  | Hydrophobic |
| Chain P↔Chain R | P | ILE69 | R | SER61 | 3.98 | Contact |
| Chain P↔Chain R | P | LYS70 | R | SER61 | 3.84 | Contact |
| Chain P↔Chain R | P | VAL72 | R | GLY67 | 3.80 | Hydrogen bond |
| Chain P↔Chain R | P | VAL72 | R | GLU66 | 3.69 | Contact |
| Chain P↔Chain R | P | ASN73 | R | ILE64 |  | Hydrophobic |
| Chain P↔Chain R | P | ASN73 | R | SER61 | 3.58 | Contact |
| Chain P↔Chain R | P | ASN73 | R | ALA65 | 3.09 | Hydrogen bond |
| Chain P↔Chain R | P | ASN73 | R | GLY67 | 3.94 | Contact |
| Chain P↔Chain R | P | ASN73 | R | GLY68 | 3.27 | Hydrogen bond |
| Chain P↔Chain R | P | ASN73 | R | ILE69 | 3.90 | Hydrogen bond |
| Chain P↔Chain R | P | TYR74 | R | TYR74 | 3.19 | Contact |
| Chain P↔Chain R | P | GLU75 | R | GLY67 | 3.70 | Contact |
| Chain P↔Chain R | P | GLU75 | R | GLY68 | 3.38 | Hydrogen bond |
| Chain P↔Chain R | P | GLU75 | R | ILE69 |  | Hydrophobic |
| Chain P↔Chain R | P | GLU75 | R | LYS70 | 3.43 | Salt bridge (Electrostatic, Hydrogen bond) |
| Chain P↔Chain R | P | SER78 | R | ILE69 | 3.65 | Contact |
| Chain P↔Chain R | P | SER78 | R | TYR74 |  | Hydrophobic |
| Chain P↔Chain R | P | SER78 | R | ALA71 | 3.87 | Hydrogen bond |
| Chain P↔Chain R | P | VAL79 | R | TYR74 |  | Hydrophobic |
| Chain P↔Chain R | P | VAL79 | R | VAL79 |  | Hydrophobic |
| Chain P↔Chain R | P | ALA82 | R | GLU75 | 3.84 | Contact |
| Chain P↔Chain R | P | ALA82 | R | GLY76 | 3.52 | Contact |
| Chain P↔Chain R | P | ALA82 | R | LYS77 | 3.70 | Hydrogen bond |
| Chain P↔Chain R | P | ALA83 | R | GLU75 | 3.84 | Hydrogen bond |
| Chain P↔Chain R | P | ALA83 | R | TYR74 |  | Hydrophobic |
| Chain P↔Chain R | P | ALA83 | R | VAL79 |  | Hydrophobic |
| Chain P↔Chain R | P | ALA83 | R | SER78 | 3.60 | Hydrogen bond |
| Chain P↔Chain R | P | ALA83 | R | LYS77 | 3.76 | Hydrogen bond |
| Chain P↔Chain R | P | LEU84 | R | LYS77 | 3.73 | Contact |
| Chain P↔Chain R | P | LEU84 | R | VAL79 | 3.97 | Contact |
| Chain P↔Chain R | P | ALA85 | R | LYS77 |  | Hydrophobic |
| Chain P↔Chain R | P | ALA85 | R | VAL79 | 2.92 | Hydrogen bond |
| Chain P↔Chain R | P | ASP86 | R | LYS77 |  | Hydrophobic |
| Chain P↔Chain R | P | SER88 | R | ALA81 | 3.92 | Contact |
| Chain P↔Chain R | P | SER88 | R | GLY80 | 3.28 | Contact |
| Chain P↔Chain R | P | VAL89 | R | VAL89 |  | Hydrophobic |
| Chain P↔Chain R | P | LEU92 | R | HIS87 | 3.23 | Hydrogen bond |
| Chain P↔Chain R | P | LEU92 | R | ASP86 | 3.91 | Contact |
| Chain P↔Chain R | P | GLN93 | R | ALA85 | 3.89 | Contact |
| Chain P↔Chain R | P | GLN93 | R | VAL89 | 3.77 | Contact |
| Chain P↔Chain R | P | GLN93 | R | SER88 | 3.98 | Contact |
| Chain P↔Chain R | P | GLN93 | R | HIS87 |  | Hydrophobic |
| Chain P↔Chain R | P | GLN93 | R | LEU84 |  | Hydrophobic |
| Chain P↔Chain R | P | GLN93 | R | ALA81 | 3.98 | Contact |
| Chain P↔Chain R | P | ALA94 | R | HIS87 | 3.84 | Contact |
| Chain P↔Chain R | P | ALA94 | R | VAL89 | 3.77 | Contact |
| Chain P↔Chain R | P | GLY95 | R | VAL89 | 3.04 | Hydrogen bond |
| Chain P↔Chain R | P | GLY95 | R | HIS87 | 3.89 | Contact |
| Chain P↔Chain R | P | GLY95 | R | GLU110 | 3.86 | Contact |
| Chain P↔Chain R | P | THR96 | R | VAL91 | 3.36 | Hydrogen bond |
| Chain P↔Chain R | P | THR96 | R | GLY90 | 3.94 | Contact |
| Chain P↔Chain R | P | GLY97 | R | VAL109 | 2.93 | Hydrogen bond |
| Chain P↔Chain R | P | GLY97 | R | ALA101 | 3.82 | Contact |
| Chain P↔Chain R | P | GLY97 | R | SER111 | 3.78 | Hydrogen bond |
| Chain P↔Chain R | P | VAL98 | R | CYS99 | 3.89 | Hydrogen bond |
| Chain P↔Chain R | P | VAL98 | R | GLU110 | 3.75 | Hydrogen bond |
| Chain P↔Chain R | P | VAL98 | R | ALA94 |  | Hydrophobic |
| Chain P↔Chain R | P | VAL98 | R | VAL98 |  | Hydrophobic |
| Chain P↔Chain R | P | CYS99 | R | CYS99 | 3.29 | Contact |
| Chain P↔Chain R | P | CYS99 | R | SER111 | 3.63 | Contact |
| Chain P↔Chain R | P | CYS99 | R | ARG113 | 3.92 | Contact |
| Chain P↔Chain R | P | THR100 | R | SER111 | 3.09 | Hydrogen bond |
| Chain P↔Chain R | P | THR100 | R | ARG113 | 3.43 | Hydrogen bond |
| Chain P↔Chain R | P | THR100 | R | LYS112 | 3.26 | Contact |
| Chain P↔Chain R | P | ALA101 | R | ARG113 | 3.56 | Hydrogen bond |
| Chain P↔Chain R | P | TYR102 | R | LYS112 |  | Hydrophobic |
| Chain P↔Chain R | P | TYR102 | R | ARG113 | 3.01 | Hydrogen bond |
| Chain P↔Chain R | P | TYR102 | R | TYR115 | 3.69 | Contact |
| Chain P↔Chain R | P | TYR102 | R | VAL114 | 3.60 | Contact |
| Chain P↔Chain R | P | ASP103 | R | VAL114 |  | Hydrophobic |
| Chain P↔Chain R | P | ALA104 | R | TYR115 | 3.73 | Hydrogen bond |
| Chain P↔Chain R | P | ALA104 | R | LEU116 |  | Hydrophobic |
| Chain P↔Chain R | P | ALA104 | R | GLN120 |  | Hydrophobic |
| Chain P↔Chain R | P | SER111 | R | ARG113 | 3.96 | Contact |
| Chain P↔Chain R | P | SER111 | R | TYR115 | 3.97 | Contact |
| Chain P↔Chain R | P | ASP132 | R | TYR115 | 3.79 | Contact |
| Chain P↔Chain R | P | TYR134 | R | TYR134 | 3.80 | Contact |
| Chain Q↔Chain R | Q | ASN5 | R | ASN5 | 3.66 | Contact |
| Chain Q↔Chain R | Q | VAL6 | R | ASN5 | 3.73 | Contact |
| Chain Q↔Chain R | Q | VAL6 | R | VAL6 | 3.00 | Hydrogen bond |
| Chain Q↔Chain R | Q | MET7 | R | ILE3 | 3.66 | Contact |
| Chain Q↔Chain R | Q | MET7 | R | ALA4 | 3.34 | Contact |
| Chain Q↔Chain R | Q | MET7 | R | VAL6 |  | Hydrophobic |
| Chain Q↔Chain R | Q | MET8 | R | ALA4 | 3.87 | Contact |
| Chain Q↔Chain R | Q | MET8 | R | VAL6 | 3.82 | Contact |
| Chain Q↔Chain R | Q | MET8 | R | ILE3 | 3.58 | Contact |
| Chain Q↔Chain R | Q | MET8 | R | MET22 | 3.81 | Hydrogen bond |
| Chain Q↔Chain R | Q | ASP9 | R | ILE3 | 3.21 | Contact |
| Chain Q↔Chain R | Q | ASP9 | R | THR2 | 3.78 | Hydrogen bond |
| Chain Q↔Chain R | Q | THR10 | R | THR2 | 3.92 | Hydrogen bond |
| Chain Q↔Chain R | Q | PRO14 | R | GLU28 | 3.38 | Contact |
| Chain Q↔Chain R | Q | GLY15 | R | GLU25 | 3.19 | Hydrogen bond |
| Chain Q↔Chain R | Q | GLY15 | R | GLU28 | 3.76 | Contact |
| Chain Q↔Chain R | Q | GLY15 | R | LEU29 | 3.76 | Contact |
| Chain Q↔Chain R | Q | LYS17 | R | GLU25 | 3.67 | Contact |
| Chain Q↔Chain R | Q | ILE23 | R | LEU29 |  | Hydrophobic |
| Chain Q↔Chain R | Q | ILE26 | R | LEU29 |  | Hydrophobic |
| Chain Q↔Chain R | Q | ILE26 | R | ILE26 |  | Hydrophobic |
| Chain Q↔Chain R | Q | ALA30 | R | ALA30 | 3.24 | Contact |
| Chain Q↔Chain R | Q | PRO31 | R | ALA30 |  | Hydrophobic |
| Chain Q↔Chain R | Q | GLY32 | R | ALA30 | 3.52 | Contact |
| Chain Q↔Chain R | Q | GLY32 | R | PRO34 | 3.78 | Contact |
| Chain Q↔Chain R | Q | GLY32 | R | GLY32 | 3.19 | Hydrogen bond |
| Chain Q↔Chain R | Q | GLY32 | R | ILE33 | 3.94 | Contact |
| Chain Q↔Chain R | Q | ILE33 | R | PRO35 |  | Hydrophobic |
| Chain Q↔Chain R | Q | ILE33 | R | LYS43 | 3.83 | Contact |
| Chain Q↔Chain R | Q | PRO34 | R | LYS43 | 3.11 | Contact |
| Chain Q↔Chain R | Q | PRO34 | R | PRO34 |  | Hydrophobic |
| Chain Q↔Chain R | Q | PRO35 | R | LYS43 | 3.81 | Contact |
| Chain Q↔Chain R | Q | ASP36 | R | ALA42 | 3.98 | Contact |
| Chain Q↔Chain R | Q | GLY37 | R | ALA42 | 3.08 | Hydrogen bond |
| Chain Q↔Chain R | Q | GLY37 | R | LYS43 | 3.88 | Contact |
| Chain Q↔Chain R | Q | GLY37 | R | LEU44 | 3.51 | Contact |
| Chain Q↔Chain R | Q | GLY37 | R | HIS45 |  | Hydrophobic |
| Chain Q↔Chain R | Q | THR38 | R | LYS43 | 3.06 | Hydrogen bond |
| Chain Q↔Chain R | Q | ILE39 | R | LEU44 |  | Hydrophobic |
| Chain Q↔Chain R | Q | ILE39 | R | LYS43 | 3.51 | Hydrogen bond |
| Chain Q↔Chain R | Q | ILE39 | R | HIS45 | 3.78 | Contact |
| Chain Q↔Chain R | Q | THR40 | R | HIS45 | 3.51 | Hydrogen bond |
| Chain Q↔Chain R | Q | GLU41 | R | ALA48 |  | Hydrophobic |
| Chain Q↔Chain R | Q | GLU41 | R | GLN47 | 3.97 | Contact |
| Chain Q↔Chain R | Q | GLU41 | R | LYS53 | 3.74 | Contact |
| Chain Q↔Chain R | Q | LEU44 | R | LYS53 |  | Hydrophobic |
| Chain Q↔Chain R | Q | ASN46 | R | LYS53 | 3.10 | Hydrogen bond |
| Chain Q↔Chain R | Q | ASN46 | R | ASP52 | 3.84 | Contact |
| Chain Q↔Chain R | Q | GLN47 | R | LYS55 | 3.80 | Contact |
| Chain Q↔Chain R | Q | GLN47 | R | LYS53 | 3.92 | Hydrogen bond |
| Chain Q↔Chain R | Q | GLN47 | R | ASP52 | 3.18 | Hydrogen bond |
| Chain Q↔Chain R | Q | GLN47 | R | LEU54 | 3.99 | Hydrogen bond |
| Chain Q↔Chain R | Q | GLN47 | R | PRO56 |  | Hydrophobic |
| Chain Q↔Chain R | Q | ALA48 | R | LYS53 | 3.22 | Hydrogen bond |
| Chain Q↔Chain R | Q | VAL49 | R | LYS55 | 3.89 | Contact |
| Chain Q↔Chain R | Q | VAL49 | R | LYS53 | 3.40 | Hydrogen bond |
| Chain Q↔Chain R | Q | VAL49 | R | VAL49 |  | Hydrophobic |
| Chain Q↔Chain R | Q | VAL49 | R | LEU54 |  | Hydrophobic |
| Chain Q↔Chain R | Q | ARG51 | R | ALA58 | 3.56 | Contact |
| Chain Q↔Chain R | Q | ARG51 | R | ILE63 | 3.94 | Contact |
| Chain Q↔Chain R | Q | ARG51 | R | ASP60 | 3.87 | Contact |
| Chain Q↔Chain R | Q | LEU54 | R | ILE63 |  | Hydrophobic |
| Chain Q↔Chain R | Q | LYS55 | R | GLU41 | 3.90 | Salt bridge (Electrostatic, Hydrogen bond) |
| Chain Q↔Chain R | Q | PRO56 | R | THR62 | 4.00 | Contact |
| Chain Q↔Chain R | Q | GLY57 | R | ILE63 | 3.93 | Contact |
| Chain Q↔Chain R | Q | GLY57 | R | THR62 | 3.70 | Hydrogen bond |
| Chain Q↔Chain R | Q | GLY57 | R | ALA65 |  | Hydrophobic |
| Chain Q↔Chain R | Q | ALA58 | R | ILE63 | 3.55 | Hydrogen bond |
| Chain Q↔Chain R | Q | VAL59 | R | ILE63 |  | Hydrophobic |
| Chain Q↔Chain R | Q | VAL59 | R | ALA65 | 3.08 | Hydrogen bond |
| Chain Q↔Chain R | Q | VAL59 | R | ILE64 |  | Hydrophobic |
| Chain Q↔Chain R | Q | ASP60 | R | GLY68 | 3.50 | Contact |
| Chain Q↔Chain R | Q | ASP60 | R | ALA65 | 3.71 | Contact |
| Chain Q↔Chain R | Q | SER61 | R | LYS70 |  | Hydrophobic |
| Chain Q↔Chain R | Q | SER61 | R | GLY68 | 3.62 | Hydrogen bond |
| Chain Q↔Chain R | Q | SER61 | R | ASN73 | 3.73 | Contact |
| Chain Q↔Chain R | Q | ILE64 | R | ASN73 | 3.80 | Hydrogen bond |
| Chain Q↔Chain R | Q | ALA65 | R | ASN73 | 3.60 | Hydrogen bond |
| Chain Q↔Chain R | Q | GLU66 | R | VAL72 | 3.91 | Contact |
| Chain Q↔Chain R | Q | GLY67 | R | VAL72 | 3.59 | Hydrogen bond |
| Chain Q↔Chain R | Q | GLY67 | R | ASN73 |  | Hydrophobic |
| Chain Q↔Chain R | Q | GLY67 | R | TYR74 | 3.37 | Contact |
| Chain Q↔Chain R | Q | GLY67 | R | GLU75 | 3.47 | Contact |
| Chain Q↔Chain R | Q | GLY68 | R | GLU75 | 3.01 | Hydrogen bond |
| Chain Q↔Chain R | Q | GLY68 | R | ASN73 | 3.33 | Hydrogen bond |
| Chain Q↔Chain R | Q | ILE69 | R | GLU75 | 3.18 | Hydrogen bond |
| Chain Q↔Chain R | Q | ILE69 | R | ASN73 | 3.92 | Hydrogen bond |
| Chain Q↔Chain R | Q | ILE69 | R | ILE69 |  | Hydrophobic |
| Chain Q↔Chain R | Q | ILE69 | R | TYR74 |  | Hydrophobic |
| Chain Q↔Chain R | Q | LYS70 | R | GLU75 |  | Hydrophobic |
| Chain Q↔Chain R | Q | ALA71 | R | SER78 | 3.89 | Contact |
| Chain Q↔Chain R | Q | TYR74 | R | TYR74 |  | Hydrophobic |
| Chain Q↔Chain R | Q | TYR74 | R | VAL79 |  | Hydrophobic |
| Chain Q↔Chain R | Q | TYR74 | R | SER78 | 3.70 | Hydrogen bond |
| Chain Q↔Chain R | Q | GLU75 | R | ALA83 | 3.89 | Hydrogen bond |
| Chain Q↔Chain R | Q | GLY76 | R | ALA82 | 3.29 | Contact |
| Chain Q↔Chain R | Q | LYS77 | R | ALA85 | 3.61 | Contact |
| Chain Q↔Chain R | Q | LYS77 | R | ALA83 | 3.24 | Hydrogen bond |
| Chain Q↔Chain R | Q | LYS77 | R | LEU84 | 3.86 | Hydrogen bond |
| Chain Q↔Chain R | Q | LYS77 | R | ALA82 | 2.89 | Hydrogen bond |
| Chain Q↔Chain R | Q | LYS77 | R | ASP86 | 3.98 | Contact |
| Chain Q↔Chain R | Q | SER78 | R | ALA83 | 3.89 | Contact |
| Chain Q↔Chain R | Q | VAL79 | R | ALA85 | 3.58 | Contact |
| Chain Q↔Chain R | Q | VAL79 | R | ALA83 | 3.22 | Hydrogen bond |
| Chain Q↔Chain R | Q | VAL79 | R | LEU84 | 3.56 | Contact |
| Chain Q↔Chain R | Q | VAL79 | R | VAL79 |  | Hydrophobic |
| Chain Q↔Chain R | Q | GLY80 | R | SER88 |  | Hydrophobic |
| Chain Q↔Chain R | Q | ALA81 | R | SER88 | 3.88 | Hydrogen bond |
| Chain Q↔Chain R | Q | ALA81 | R | GLN93 | 3.72 | Hydrogen bond |
| Chain Q↔Chain R | Q | LEU84 | R | LEU84 |  | Hydrophobic |
| Chain Q↔Chain R | Q | LEU84 | R | GLN93 |  | Hydrophobic |
| Chain Q↔Chain R | Q | LEU84 | R | VAL89 |  | Hydrophobic |
| Chain Q↔Chain R | Q | ASP86 | R | LEU92 |  | Hydrophobic |
| Chain Q↔Chain R | Q | HIS87 | R | ALA94 | 3.74 | Contact |
| Chain Q↔Chain R | Q | HIS87 | R | LEU92 | 3.48 | Hydrogen bond |
| Chain Q↔Chain R | Q | HIS87 | R | GLN93 | 3.77 | Hydrogen bond |
| Chain Q↔Chain R | Q | HIS87 | R | GLY95 |  | Hydrophobic |
| Chain Q↔Chain R | Q | SER88 | R | GLN93 | 3.12 | Hydrogen bond |
| Chain Q↔Chain R | Q | VAL89 | R | GLY95 | 3.15 | Hydrogen bond |
| Chain Q↔Chain R | Q | VAL89 | R | GLN93 | 3.40 | Hydrogen bond |
| Chain Q↔Chain R | Q | VAL89 | R | VAL89 |  | Hydrophobic |
| Chain Q↔Chain R | Q | VAL89 | R | ALA94 |  | Hydrophobic |
| Chain Q↔Chain R | Q | GLY90 | R | VAL98 | 3.75 | Contact |
| Chain Q↔Chain R | Q | VAL91 | R | THR96 | 3.97 | Contact |
| Chain Q↔Chain R | Q | VAL91 | R | GLY97 |  | Hydrophobic |
| Chain Q↔Chain R | Q | CYS99 | R | CYS99 | 3.43 | Hydrogen bond |
| Chain Q↔Chain R | Q | CYS99 | R | ARG113 | 3.90 | Hydrogen bond |
| Chain Q↔Chain R | Q | THR100 | R | GLY97 | 3.20 | Contact |
| Chain Q↔Chain R | Q | ALA101 | R | GLY97 | 3.85 | Contact |
| Chain Q↔Chain R | Q | VAL109 | R | GLY97 | 3.91 | Contact |
| Chain Q↔Chain R | Q | GLU110 | R | GLY97 | 3.96 | Contact |
| Chain Q↔Chain R | Q | GLU110 | R | THR96 | 3.82 | Contact |
| Chain Q↔Chain R | Q | SER111 | R | VAL98 | 3.92 | Contact |
| Chain Q↔Chain R | Q | SER111 | R | THR100 | 3.41 | Hydrogen bond |
| Chain Q↔Chain R | Q | LYS112 | R | THR100 | 3.98 | Contact |
| Chain Q↔Chain R | Q | LYS112 | R | TYR102 |  | Hydrophobic |
| Chain Q↔Chain R | Q | ARG113 | R | ARG113 | 3.90 | Hydrogen bond |
| Chain Q↔Chain R | Q | ARG113 | R | THR100 | 3.33 | Hydrogen bond |
| Chain Q↔Chain R | Q | ARG113 | R | ALA101 | 3.73 | Contact |
| Chain Q↔Chain R | Q | ARG113 | R | TYR102 | 2.85 | Hydrogen bond |
| Chain Q↔Chain R | Q | ARG113 | R | SER111 | 3.80 | Contact |
| Chain Q↔Chain R | Q | ARG113 | R | ASP132 | 3.68 | Salt bridge (Electrostatic, Hydrogen bond) |
| Chain Q↔Chain R | Q | VAL114 | R | TYR102 | 3.98 | Contact |
| Chain Q↔Chain R | Q | VAL114 | R | ASP103 | 3.59 | Contact |
| Chain Q↔Chain R | Q | TYR115 | R | ASP103 | 3.96 | Contact |
| Chain Q↔Chain R | Q | TYR115 | R | TYR102 | 3.43 | Hydrogen bond |
| Chain Q↔Chain R | Q | TYR115 | R | ALA104 | 3.37 | Hydrogen bond |
| Chain Q↔Chain R | Q | TYR115 | R | ASP132 | 3.75 | Contact |
| Chain Q↔Chain R | Q | LEU116 | R | ALA104 |  | Hydrophobic |
| Chain Q↔Chain R | Q | GLN120 | R | ALA104 |  | Hydrophobic |
| Chain Q↔Chain R | Q | TYR134 | R | TYR134 | 3.83 | Hydrogen bond |

**Supplementary Tables 5i**

**gp41 chain AJ/gp28 (DTP)/gp35 (fiber)/gp40 inter complex interaction**

| **Interface** | **Chain1** | **gp41** | **Chain2** | **gp40** | **Disatnce (Å)** | **Bond type** |
| --- | --- | --- | --- | --- | --- | --- |
| Chain AJ↔Chain P | AJ | ARG7 | P | TYR115 |  | Hydrophobic |
| Chain AJ↔Chain P | AJ | ARG7 | P | ARG113 | 3.72 | Hydrogen bond |
| Chain AJ↔Chain P | AJ | PRO12 | P | SER136 | 3.29 | Hydrogen bond |
| Chain AJ↔Chain P | AJ | ILE13 | P | ILE135 |  | Hydrophobic |
| Chain AJ↔Chain P | AJ | ILE13 | P | SER136 | 3.34 | Contact |
| Chain AJ↔Chain P | AJ | ILE13 | P | TYR115 |  | Hydrophobic |
| Chain AJ↔Chain P | AJ | THR14 | P | SER136 | 3.71 | Contact |
| Chain AJ↔Chain P | AJ | THR14 | P | ILE135 | 3.63 | Hydrogen bond |
| Chain AJ↔Chain P | AJ | SER15 | P | ILE135 | 3.21 | Hydrogen bond |
| Chain AJ↔Chain P | AJ | SER15 | P | TYR134 | 3.78 | Contact |
| Chain AJ↔Chain P | AJ | SER15 | P | TYR133 | 3.77 | Hydrogen bond |
| Chain AJ↔Chain P | AJ | ILE16 | P | TYR134 |  | Hydrophobic |
| Chain AJ↔Chain P | AJ | ILE16 | P | TYR133 | 3.70 | Contact |
| Chain AJ↔Chain P | AJ | MET17 | P | TYR133 | 3.97 | Contact |
| Chain AJ↔Chain P | AJ | MET17 | P | ILE135 |  | Hydrophobic |
| Chain AJ↔Chain P | AJ | MET17 | P | TYR121 |  | Hydrophobic |
| Chain AJ↔Chain P | AJ | ARG18 | P | THR131 | 3.49 | Contact |
| Chain AJ↔Chain P | AJ | ARG18 | P | ASP132 | 3.88 | Contact |
| Chain AJ↔Chain P | AJ | ARG18 | P | PRO129 | 3.37 | Contact |
| Chain AJ↔Chain P | AJ | ARG18 | P | SER111 | 3.91 | Contact |
| Chain AJ↔Chain P | AJ | ARG18 | P | ASN130 | 3.57 | Contact |
| Chain AJ↔Chain P | AJ | GLY19 | P | TYR121 | 2.86 | Hydrogen bond |
| Chain AJ↔Chain P | AJ | GLY19 | P | PRO127 | 3.82 | Contact |
| Chain AJ↔Chain P | AJ | GLY19 | P | THR131 | 3.78 | Hydrogen bond |
| Chain AJ↔Chain P | AJ | GLY19 | P | ASP128 | 3.87 | Contact |
| Chain AJ↔Chain P | AJ | GLY19 | P | PRO129 |  | Hydrophobic |

| **Interface** | **Chain1** | **gp41** | **Chain2** | **gp40** | **Disatnce (Å)** | **Bond type** |
| --- | --- | --- | --- | --- | --- | --- |
| Chain AJ↔Chain Q | AJ | PRO2 | Q | SER136 | 3.16 | Contact |
| Chain AJ↔Chain Q | AJ | PRO3 | Q | SER136 | 3.74 | Hydrogen bond |
| Chain AJ↔Chain Q | AJ | VAL4 | Q | SER136 | 3.85 | Hydrogen bond |
| Chain AJ↔Chain Q | AJ | VAL4 | Q | ILE135 |  | Hydrophobic |
| Chain AJ↔Chain Q | AJ | VAL4 | Q | TYR134 | 3.78 | Contact |
| Chain AJ↔Chain Q | AJ | VAL4 | Q | TYR133 | 3.73 | Hydrogen bond |
| Chain AJ↔Chain Q | AJ | VAL5 | Q | TYR133 | 3.51 | Contact |
| Chain AJ↔Chain Q | AJ | VAL5 | Q | TYR134 |  | Hydrophobic |
| Chain AJ↔Chain Q | AJ | ARG6 | Q | TYR133 | 3.54 | Hydrogen bond |
| Chain AJ↔Chain Q | AJ | ARG6 | Q | ASP132 | 3.66 | Contact |
| Chain AJ↔Chain Q | AJ | ARG6 | Q | TYR121 | 3.93 | Contact |
| Chain AJ↔Chain Q | AJ | ARG7 | Q | THR131 | 3.56 | Contact |
| Chain AJ↔Chain Q | AJ | ARG7 | Q | ASP132 | 3.03 | Salt bridge (Electrostatic, Hydrogen bond) |
| Chain AJ↔Chain Q | AJ | ARG7 | Q | PRO129 | 3.88 | Contact |
| Chain AJ↔Chain Q | AJ | ARG7 | Q | ASN130 | 3.35 | Contact |
| Chain AJ↔Chain Q | AJ | GLY8 | Q | TYR133 | 3.99 | Contact |
| Chain AJ↔Chain Q | AJ | GLY8 | Q | ASP128 | 3.80 | Hydrogen bond |
| Chain AJ↔Chain Q | AJ | GLY8 | Q | PRO127 |  | Hydrophobic |
| Chain AJ↔Chain Q | AJ | GLY8 | Q | TYR121 | 3.12 | Hydrogen bond |
| Chain AJ↔Chain Q | AJ | ARG28 | Q | TYR115 |  | Hydrophobic |
| Chain AJ↔Chain Q | AJ | LEU32 | Q | SER136 | 3.50 | Contact |
| Chain AJ↔Chain Q | AJ | ARG33 | Q | SER136 | 3.81 | Hydrogen bond |
| Chain AJ↔Chain Q | AJ | ARG33 | Q | TYR134 | 3.78 | Contact |
| Chain AJ↔Chain Q | AJ | ARG33 | Q | TYR115 | 3.91 | Contact |
| Chain AJ↔Chain Q | AJ | ARG33 | Q | LEU116 | 3.81 | Hydrogen bond |

| **Interface** | **Chain1** | **gp41** | **Chain2** | **gp40** | **Disatnce (Å)** | **Bond type** |
| --- | --- | --- | --- | --- | --- | --- |
| Chain AJ↔Chain R | AJ | ARG18 | R | TYR115 |  | Hydrophobic |
| Chain AJ↔Chain R | AJ | PRO22 | R | ILE135 | 3.95 | Hydrogen bond |
| Chain AJ↔Chain R | AJ | PRO22 | R | SER136 | 3.52 | Contact |
| Chain AJ↔Chain R | AJ | ILE23 | R | TYR134 |  | Hydrophobic |
| Chain AJ↔Chain R | AJ | ILE23 | R | ILE135 | 3.39 | Contact |
| Chain AJ↔Chain R | AJ | ILE23 | R | SER136 |  | Hydrophobic |
| Chain AJ↔Chain R | AJ | LYS24 | R | ILE135 | 3.03 | Hydrogen bond |
| Chain AJ↔Chain R | AJ | LYS24 | R | SER136 | 3.19 | Contact |
| Chain AJ↔Chain R | AJ | GLU25 | R | ILE135 | 3.95 | Hydrogen bond |
| Chain AJ↔Chain R | AJ | GLU25 | R | TYR134 | 3.75 | Contact |
| Chain AJ↔Chain R | AJ | GLU25 | R | TYR133 | 3.27 | Hydrogen bond |
| Chain AJ↔Chain R | AJ | ILE26 | R | TYR133 | 3.90 | Contact |
| Chain AJ↔Chain R | AJ | ILE26 | R | ASP132 |  | Hydrophobic |
| Chain AJ↔Chain R | AJ | ILE26 | R | TYR134 |  | Hydrophobic |
| Chain AJ↔Chain R | AJ | ARG27 | R | TYR133 | 3.34 | Hydrogen bond |
| Chain AJ↔Chain R | AJ | ARG27 | R | TYR121 | 3.86 | Contact |
| Chain AJ↔Chain R | AJ | ARG27 | R | THR131 | 3.68 | Hydrogen bond |
| Chain AJ↔Chain R | AJ | ARG27 | R | ASP132 | 3.93 | Contact |
| Chain AJ↔Chain R | AJ | ARG28 | R | THR131 | 3.61 | Contact |
| Chain AJ↔Chain R | AJ | ARG28 | R | ASP132 | 3.99 | Contact |
| Chain AJ↔Chain R | AJ | ARG28 | R | SER111 | 3.91 | Contact |
| Chain AJ↔Chain R | AJ | ARG28 | R | GLU110 | 3.64 | Contact |
| Chain AJ↔Chain R | AJ | ARG28 | R | ASN130 | 3.53 | Hydrogen bond |
| Chain AJ↔Chain R | AJ | GLY29 | R | THR131 | 3.53 | Hydrogen bond |
| Chain AJ↔Chain R | AJ | GLY29 | R | ASP128 | 3.94 | Hydrogen bond |
| Chain AJ↔Chain R | AJ | GLY29 | R | TYR121 | 3.94 | Contact |
| Chain AJ↔Chain R | AJ | GLY29 | R | PRO127 |  | Hydrophobic |
| Chain AJ↔Chain R | AJ | THR30 | R | TYR121 | 3.97 | Contact |
| Chain AJ↔Chain R | AJ | GLN312 | R | ALA122 | 3.86 | Contact |
| Chain AJ↔Chain R | AJ | ARG314 | R | ALA119 | 3.82 | Hydrogen bond |
| Chain AJ↔Chain R | AJ | ASN327 | R | ALA122 | 3.37 | Contact |
| Chain AJ↔Chain R | AJ | ASN327 | R | LEU123 | 3.74 | Hydrogen bond |
| Chain AJ↔Chain R | AJ | GLY328 | R | ALA119 |  | Hydrophobic |
| Chain AJ↔Chain R | AJ | GLY328 | R | ALA122 | 3.43 | Contact |
| Chain AJ↔Chain R | AJ | GLY328 | R | LEU123 | 3.96 | Contact |

| **Interface** | **Chain1** | **gp41** | **Chain2** | **gp35** | **Disatnce (Å)** | **Bond type** |
| --- | --- | --- | --- | --- | --- | --- |
| Chain AJ↔Chain AT | AJ | ARG28 | AT | GLY39 | 3.91 | Contact |
| Chain AJ↔Chain AT | AJ | GLY29 | AT | GLY39 | 3.57 | Contact |
| Chain AJ↔Chain AT | AJ | THR30 | AT | GLY39 | 3.03 | Hydrogen bond |
| Chain AJ↔Chain AT | AJ | THR30 | AT | ALA40 | 3.29 | Contact |
| Chain AJ↔Chain AT | AJ | THR30 | AT | THR42 | 3.56 | Contact |
| Chain AJ↔Chain AT | AJ | GLU31 | AT | GLY39 | 3.53 | Hydrogen bond |
| Chain AJ↔Chain AT | AJ | GLU31 | AT | SER38 | 3.61 | Hydrogen bond |
| Chain AJ↔Chain AT | AJ | GLU31 | AT | ASP41 | 3.93 | Hydrogen bond |
| Chain AJ↔Chain AT | AJ | GLU88 | AT | THR130 | 3.48 | Contact |
| Chain AJ↔Chain AT | AJ | GLY89 | AT | THR130 | 3.15 | Hydrogen bond |
| Chain AJ↔Chain AT | AJ | GLY90 | AT | THR130 |  | Hydrophobic |
| Chain AJ↔Chain AT | AJ | VAL91 | AT | THR130 | 3.71 | Contact |
| Chain AJ↔Chain AT | AJ | VAL213 | AT | ALA183 |  | Hydrophobic |
| Chain AJ↔Chain AT | AJ | GLY214 | AT | SER185 | 3.70 | Contact |
| Chain AJ↔Chain AT | AJ | GLY214 | AT | PRO184 | 3.28 | Contact |
| Chain AJ↔Chain AT | AJ | GLY214 | AT | LYS44 | 3.37 | Contact |
| Chain AJ↔Chain AT | AJ | ASN215 | AT | THR43 | 3.18 | Hydrogen bond |
| Chain AJ↔Chain AT | AJ | ASN215 | AT | LYS44 | 3.89 | Contact |
| Chain AJ↔Chain AT | AJ | ASN215 | AT | SER185 | 3.91 | Hydrogen bond |
| Chain AJ↔Chain AT | AJ | ARG218 | AT | ASN182 | 3.61 | Hydrogen bond |
| Chain AJ↔Chain AT | AJ | ASP223 | AT | LYS181 | 2.89 | Salt bridge (Electrostatic, Hydrogen bond) |
| Chain AJ↔Chain AT | AJ | ARG251 | AT | LEU46 | 3.90 | Contact |
| Chain AJ↔Chain AT | AJ | ILE252 | AT | LEU46 | 3.28 | Contact |
| Chain AJ↔Chain AT | AJ | ALA253 | AT | LEU46 |  | Hydrophobic |
| Chain AJ↔Chain AT | AJ | GLU254 | AT | LYS44 | 3.83 | Salt bridge (Electrostatic, Hydrogen bond) |
| Chain AJ↔Chain AT | AJ | GLU254 | AT | PRO184 | 3.89 | Contact |
| Chain AJ↔Chain AT | AJ | GLU254 | AT | ASN177 | 3.86 | Contact |
| Chain AJ↔Chain AT | AJ | LEU255 | AT | ASN177 | 3.65 | Hydrogen bond |
| Chain AJ↔Chain AT | AJ | GLY256 | AT | ASN177 | 3.59 | Hydrogen bond |
| Chain AJ↔Chain AT | AJ | ALA310 | AT | LEU46 | 3.51 | Contact |
| Chain AJ↔Chain AT | AJ | SER363 | AT | VAL131 |  | Hydrophobic |
| Chain AJ↔Chain AT | AJ | GLY364 | AT | VAL131 | 3.66 | Contact |
| Chain AJ↔Chain AT | AJ | ARG366 | AT | ASN182 | 3.96 | Hydrogen bond |
| Chain AJ↔Chain AT | AJ | ARG366 | AT | LYS181 | 3.89 | Contact |
| Chain AJ↔Chain AT | AJ | PHE368 | AT | ASN182 |  | Hydrophobic |
| Chain AJ↔Chain AT | AJ | ASP373 | AT | LYS44 | 3.52 | Contact |

| **Interface** | **Chain1** | **gp41** | **Chain2** | **gp37** | **Disatnce (Å)** | **Bond type** |
| --- | --- | --- | --- | --- | --- | --- |
| Chain AJ↔Chain BE | AJ | LEU255 | BE | TYR41 | 3.36 | Contact |
| Chain AJ↔Chain BE | AJ | LEU255 | BE | SER40 | 3.71 | Contact |
| Chain AJ↔Chain BE | AJ | LEU255 | BE | ALA42 | 3.82 | Contact |
| Chain AJ↔Chain BE | AJ | PRO258 | BE | THR184 | 3.96 | Contact |
| Chain AJ↔Chain BE | AJ | PRO258 | BE | VAL44 |  | Hydrophobic |
| Chain AJ↔Chain BE | AJ | ASN284 | BE | GLY46 | 3.74 | Contact |
| Chain AJ↔Chain BE | AJ | ASN284 | BE | GLY45 |  | Hydrophobic |
| Chain AJ↔Chain BE | AJ | SER285 | BE | TYR41 | 3.57 | Contact |
| Chain AJ↔Chain BE | AJ | SER285 | BE | ALA42 | 3.50 | Contact |
| Chain AJ↔Chain BE | AJ | GLN286 | BE | ILE47 |  | Hydrophobic |
| Chain AJ↔Chain BE | AJ | GLN286 | BE | LYS49 | 3.67 | Contact |
| Chain AJ↔Chain BE | AJ | ASN303 | BE | ILE47 |  | Hydrophobic |
| Chain AJ↔Chain BE | AJ | SER306 | BE | TYR41 |  | Hydrophobic |
| Chain AJ↔Chain BE | AJ | SER306 | BE | LYS49 |  | Hydrophobic |
| Chain AJ↔Chain BE | AJ | SER306 | BE | ASP51 | 3.16 | Hydrogen bond |
| Chain AJ↔Chain BE | AJ | PHE307 | BE | SER40 | 3.82 | Hydrogen bond |
| Chain AJ↔Chain BE | AJ | PHE307 | BE | TYR41 | 3.52 | Contact |
| Chain AJ↔Chain BE | AJ | GLY308 | BE | SER40 | 3.56 | Contact |
| Chain AJ↔Chain BE | AJ | PRO309 | BE | SER40 | 3.52 | Contact |

**Supplementary Tables 5i**

**gp41 (fiber) chain AJ interactions (Intra)**

| **Interface** | **Chain1** | **gp41** | **Chain2** | **gp41** | **Disatnce (Å)** | **Bond type** |
| --- | --- | --- | --- | --- | --- | --- |
| Chain AI↔Chain AJ | AI | GLY164 | AJ | TYR109 | 3.16 | Contact |
| Chain AI↔Chain AJ | AI | LEU165 | AJ | TYR109 | 3.59 | Contact |
| Chain AI↔Chain AJ | AI | LEU165 | AJ | PHE132 | 3.44 | Contact |
| Chain AI↔Chain AJ | AI | PHE166 | AJ | PHE132 |  | Hydrophobic |
| Chain AI↔Chain AJ | AI | PRO167 | AJ | PRO130 |  | Hydrophobic |
| Chain AI↔Chain AJ | AI | PRO167 | AJ | PHE132 |  | Hydrophobic |
| Chain AI↔Chain AJ | AI | VAL169 | AJ | ASP138 | 3.38 | Contact |
| Chain AI↔Chain AJ | AI | GLY171 | AJ | ILE129 |  | Hydrophobic |
| Chain AI↔Chain AJ | AI | LEU173 | AJ | TYR109 | 3.96 | Contact |
| Chain AI↔Chain AJ | AI | LEU173 | AJ | PRO130 |  | Hydrophobic |
| Chain AI↔Chain AJ | AI | PRO176 | AJ | TYR109 |  | Hydrophobic |
| Chain AI↔Chain AJ | AI | CYS193 | AJ | CYS110 | 3.72 | Contact |
| Chain AI↔Chain AJ | AI | SER227 | AJ | CYS110 | 3.70 | Hydrogen bond |
| Chain AI↔Chain AJ | AI | SER227 | AJ | TYR109 | 3.87 | Contact |
| Chain AI↔Chain AJ | AI | LEU228 | AJ | ALA112 | 3.50 | Contact |
| Chain AI↔Chain AJ | AI | ASN229 | AJ | CYS110 | 3.84 | Contact |
| Chain AI↔Chain AJ | AI | LYS360 | AJ | ALA112 | 3.56 | Contact |
| Chain AI↔Chain AJ | AI | GLU361 | AJ | ALA112 |  | Hydrophobic |
| Chain AI↔Chain AJ | AI | GLU361 | AJ | GLY114 | 3.90 | Contact |
| Chain AI↔Chain AJ | AI | GLU361 | AJ | GLY115 | 3.97 | Hydrogen bond |
| Chain AI↔Chain AJ | AI | LEU362 | AJ | ALA112 | 3.15 | Hydrogen bond |
| Chain AI↔Chain AJ | AI | LEU362 | AJ | TRP113 | 3.86 | Contact |
| Chain AI↔Chain AJ | AI | LEU362 | AJ | TYR109 |  | Hydrophobic |
| Chain AI↔Chain AJ | AI | LEU362 | AJ | LEU122 |  | Hydrophobic |
| Chain AI↔Chain AJ | AI | SER363 | AJ | SER116 | 3.35 | Hydrogen bond |
| Chain AI↔Chain AJ | AI | SER363 | AJ | GLY121 | 3.45 | Hydrogen bond |
| Chain AI↔Chain AJ | AI | SER363 | AJ | LEU122 | 3.65 | Contact |

| **Interface** | **Chain1** | **gp41** | **Chain2** | **gp41** | **Disatnce (Å)** | **Bond type** |
| --- | --- | --- | --- | --- | --- | --- |
| Chain AJ↔Chain AK | AJ | GLY164 | AK | TYR109 | 3.99 | Contact |
| Chain AJ↔Chain AK | AJ | LEU165 | AK | TYR109 | 3.97 | Contact |
| Chain AJ↔Chain AK | AJ | LEU165 | AK | PHE132 | 3.32 | Contact |
| Chain AJ↔Chain AK | AJ | PHE166 | AK | PHE132 |  | Hydrophobic |
| Chain AJ↔Chain AK | AJ | PRO167 | AK | PRO130 |  | Hydrophobic |
| Chain AJ↔Chain AK | AJ | VAL169 | AK | ASP138 | 3.33 | Contact |
| Chain AJ↔Chain AK | AJ | VAL169 | AK | TRP139 | 3.93 | Hydrogen bond |
| Chain AJ↔Chain AK | AJ | GLY171 | AK | ILE129 | 3.36 | Contact |
| Chain AJ↔Chain AK | AJ | LEU173 | AK | TYR109 |  | Hydrophobic |
| Chain AJ↔Chain AK | AJ | LEU173 | AK | PRO130 |  | Hydrophobic |
| Chain AJ↔Chain AK | AJ | PRO176 | AK | TYR109 |  | Hydrophobic |
| Chain AJ↔Chain AK | AJ | CYS193 | AK | CYS110 | 3.02 | Contact |
| Chain AJ↔Chain AK | AJ | SER227 | AK | CYS110 | 3.89 | Hydrogen bond |
| Chain AJ↔Chain AK | AJ | LEU228 | AK | ALA112 | 3.83 | Contact |
| Chain AJ↔Chain AK | AJ | ASN229 | AK | CYS110 | 3.90 | Contact |
| Chain AJ↔Chain AK | AJ | LYS360 | AK | ALA112 | 3.43 | Contact |
| Chain AJ↔Chain AK | AJ | GLU361 | AK | ALA112 |  | Hydrophobic |
| Chain AJ↔Chain AK | AJ | GLU361 | AK | TRP113 | 3.98 | Contact |
| Chain AJ↔Chain AK | AJ | GLU361 | AK | GLY114 | 3.05 | Hydrogen bond |
| Chain AJ↔Chain AK | AJ | LEU362 | AK | ALA112 | 3.10 | Hydrogen bond |
| Chain AJ↔Chain AK | AJ | LEU362 | AK | TYR109 |  | Hydrophobic |
| Chain AJ↔Chain AK | AJ | LEU362 | AK | LEU122 |  | Hydrophobic |
| Chain AJ↔Chain AK | AJ | SER363 | AK | GLY115 | 3.85 | Hydrogen bond |
| Chain AJ↔Chain AK | AJ | SER363 | AK | SER116 | 3.08 | Hydrogen bond |
| Chain AJ↔Chain AK | AJ | SER363 | AK | LEU122 | 3.95 | Contact |
